# Supplementary material for: Regioselectivity enhancement in synthesis of [70]fullerene derivatives by introduction of a branched structure
Source: Royal Society of Chemistry journal article supplement (doi:10.1039/c8ob03144d), 2019-01-01
Supplement: c8ob03144d1.pdf [file c8ob03144d1.pdf]

## Supporting Information

### Regioselectivity enhancement in synthesis of [70]fullerene derivatives by introduction of a branched structure

Fukashi Matsumoto,\* Shuhei Sumino, Toshiyuki Iwai, and Takatoshi Ito

Research Division of Organic Materials, Osaka Research Institute of Industrial Science and Technology

|                                                                                                    |       |
|----------------------------------------------------------------------------------------------------|-------|
| General methods                                                                                    | S2    |
| Synthesis and characterization                                                                     | S2    |
| Computational details for density functional theory calculations                                   | S2    |
| Calibration of level of theory for NMR calculations of [60]PCBM                                    | S3    |
| Validation of NMR calculation using experimental chemical shifts of [70]PCBM                       | S3    |
| Assignments of <sup>1</sup> H NMR chemical shifts to [70]PCMBM isomers                             | S4    |
| References                                                                                         | S4    |
| Supplementary figures and tables                                                                   |       |
| Fig. S1 Reaction coordinate pathways                                                               | S2    |
| Table S1 Calculated and experimental <sup>1</sup> H NMR chemical shifts of [60]PCBM                | S2    |
| Table S2 Calculated and experimental <sup>1</sup> H NMR chemical shifts of [70]PCBM isomers        | S3    |
| Fig. S2 Correlations of calculated and experimental <sup>1</sup> H NMR chemical shifts of [70]PCBM | S3    |
| Fig. S3 Three-dimensional structures of α-[70]PCMBM diastereomers                                  | S4    |
| Table S3 Calculated and experimental <sup>1</sup> H NMR chemical shifts of [70]PCMBM isomers       | S4    |
| Fig. S4 Biradical nature of triplet intermediate ( <sup>3</sup> IM-Pr)                             | S5    |
| Fig. S5 <sup>1</sup> H NMR spectrum of <b>1b</b>                                                   | S5    |
| Fig. S6 <sup>1</sup> H NMR spectrum of <b>2b</b>                                                   | S5    |
| Fig. S7 <sup>13</sup> C NMR spectrum of <b>1b</b>                                                  | S6    |
| Fig. S8 <sup>13</sup> C NMR spectrum of <b>2b</b>                                                  | S6    |
| Fig. S9 MALDI-TOF-HRMS spectrum of <b>1b</b>                                                       | S7    |
| Fig. S10 MALDI-TOF-HRMS spectrum of <b>2b</b>                                                      | S7    |
| Fig. S11 HPLC chromatogram of <b>2b</b>                                                            | S7    |
| Table S4 Computational data                                                                        | S8-18 |

## General methods

$^1\text{H}$  NMR and  $^{13}\text{C}$  NMR spectra were recorded with a 600 MHz instrument in deuterated chloroform with tetramethylsilane as an internal reference. Mass spectra were obtained with matrix-assisted laser desorption ionization time-of-flight (MALDI-TOF) mass spectrometry using sinapinic acid as a matrix. High-performance liquid chromatography (HPLC) analysis was performed with a COSMOSIL Buckyprep-D column (4.6 mm I.D.  $\times$  250 mm) using toluene as an eluent at 1.0 mL/min flow rate, 320 nm detection, at 30  $^\circ\text{C}$ . [6,6]-Phenyl- $\text{C}_{61}$ -butyric acid methyl ester ([60]PCBM)<sup>1</sup>, [6,6]-Phenyl- $\text{C}_{71}$ -butyric acid methyl ester ([70]PCBM)<sup>2</sup> and methyl 4-benzoylvalerate<sup>3</sup> were synthesized in accordance with the methods described in the literatures. All the other solvents and materials are commercially available and were used as received.

## Synthesis and characterization

**Methyl 4-benzoylvalerate *p*-tosylhydrazide (**1b**).** A mixture of 1.0 g (4.5 mmol) of methyl 4-benzoylvalerate and 1.5 g (9.1 mmol) of *p*-toluenesulfonyl hydrazide was dissolved in methanol (3.0 mL). 0.9 mL of conc. HCl was added to the solution and stirred for 18 h at 60  $^\circ\text{C}$ . After cooling to room temperature, the crude product was extracted with ethyl acetate from  $\text{NaHCO}_3$  aqueous solution. After silica column separation using ethyl acetate/hexane (1:3) as an eluent, recrystallization from methanol gave the white crystal of **1b** (0.5 g, 27%).  $^1\text{H}$  NMR:  $\delta\text{H}$  (600 MHz;  $\text{CDCl}_3$ ;  $\text{Me}_4\text{Si}$ ) 7.76 (d, 2 H,  $J$  = 8.3 Hz, Ar), 7.43 (m, 3 H, Ar), 7.32 (d, 2 H,  $J$  = 8.3 Hz, Ar), 7.26 (s, 1 H, NH), 6.99 (dd, 2 H,  $J$  = 7.6, 1.4 Hz, Ar), 3.65 (s, 3 H,  $\text{OCH}_3$ ), 2.61 (qt, 1 H,  $J$  = 6.9, 6.9 Hz, CH), 2.44 (s, 3 H,  $\text{ArCH}_3$ ), 2.13 (m, 2 H,  $\text{CH}_2$ ), 1.86 (dt, 1 H,  $J$  = 8.3, 14.5 Hz,  $\text{CH}_2$ ), 1.62 (dt, 1 H,  $J$  = 6.9, 14.4 Hz,  $\text{CH}_2$ ), 1.01 (d, 3 H,  $J$  = 6.9 Hz,  $\text{CCH}_3$ ).  $^{13}\text{C}$  NMR:  $\delta\text{C}$  (151 MHz;  $\text{CDCl}_3$ ;  $\text{Me}_4\text{Si}$ ) 173.71, 160.60, 144.02, 135.18, 131.92, 129.78, 129.58, 129.50, 127.88, 126.95, 51.50, 40.87, 31.37, 28.41, 21.56, 17.96. FT-IR (KBr):  $\nu_{\text{max}}/\text{cm}^{-1}$  3197, 2952, 1737, 1342, 1165, 671, 549. HRMS (MALDI-TOF, positive):  $m/z$  calcd for  $\text{C}_{20}\text{H}_{25}\text{N}_2\text{O}_4\text{S}$   $[\text{M}+\text{H}]^+$  389.1535; found 389.1531.

**1-(3-(Methoxycarbonyl)-1-methylpropyl)-1-phenyl-[6,6]-[70]-methanofullerene ([70]PCMBM, **2b**).** To a solution of **1b** (25 mg, 0.065 mmol) in 1.0 mL of 1,2-dichlorobenzene, 2.0 M THF solution of sodium *tert*-butoxide (0.036 mL, 0.071 mmol) was added under argon atmosphere and stirred for 30 min at room temperature. Then the mixture was added to a solution of  $\text{C}_{70}$  (50 mg, 0.059 mmol) in 6 mL of 1,2-dichlorobenzene, and stirred for 2 h at 90  $^\circ\text{C}$ . The reaction mixture was irradiated with a 375 W incandescent lamp and stirred for 2 h. The mixture was concentrated and purified by silica gel column (Toluene) and recycle preparative gel permeation chromatography (chloroform). The obtained product was centrifuged with methanol to afford **2b** as a brown powder (33 mg, 54%). 99.26% purity in HPLC analysis.  $^1\text{H}$  NMR ( $\alpha$ -diastereomers):  $\delta\text{H}$  (600 MHz;  $\text{CDCl}_3$ ;  $\text{Me}_4\text{Si}$ ) 8.02, 7.99 (d, 1 H,  $J$  = 7.6 Hz, Ar), 7.73, 7.69 (1 H, Ar), 7.56 (1 H, Ar), 7.44 (2 H, Ar), 3.77, 3.61 (s, 3 H,  $\text{OCH}_3$ ), 2.72, 2.65, 1.82, 1.73 (m, 2 H,  $\text{CH}_2$ ), 2.56, 2.48, 2.31 (m, 2 H,  $\text{CH}_2$ ), 2.48 (m, 1 H, CH), 1.51, 1.33 (d, 3 H,  $J$  = 6.9 Hz,  $\text{CCH}_3$ ).  $^{13}\text{C}$  NMR ( $\alpha$ -diastereomers):  $\delta\text{C}$  (151 MHz;  $\text{CDCl}_3$ ;  $\text{Me}_4\text{Si}$ ) 173.70, 173.54, 156.07, 155.97, 155.18, 152.14, 152.10, 151.89, 151.46, 151.20, 151.13, 150.88, 150.83, 150.58, 150.52, 149.42, 149.39, 149.19, 149.14, 148.63, 148.55, 148.52, 148.46, 148.42, 148.33, 148.02, 147.93, 147.88, 147.56, 147.53, 147.41, 147.35, 147.04, 146.85, 146.29, 146.19, 146.10, 145.92, 145.81, 145.61, 144.79, 144.66, 144.51, 144.12, 144.05, 143.92, 143.84, 143.74, 143.61, 143.31, 143.21, 142.63, 142.46, 141.89, 141.84, 141.54, 141.50, 141.32, 140.97, 140.84, 140.27, 140.21, 139.26, 139.15, 139.08, 139.01, 137.83, 137.69, 134.02, 133.82, 133.72, 133.66, 133.35, 133.25, 132.95, 132.83, 130.91, 130.75, 130.66, 130.44, 128.27, 128.00, 127.88, 127.84, 127.72, 72.42, 71.67, 70.38, 69.55, 51.85, 51.70, 40.92, 40.85, 34.47, 34.45, 32.46, 32.30, 29.69, 28.87, 28.79, 16.55. FT-IR (KBr):  $\nu_{\text{max}}/\text{cm}^{-1}$  2924, 2852, 1737, 1428, 1256, 1076, 795. HRMS (MALDI-TOF, negative):  $m/z$  calcd for  $\text{C}_{83}\text{H}_{16}\text{O}_2$   $[\text{M}]^-$  1044.1150; found 1044.1193.

## Computational details for density functional theory calculations

**NMR calculations.**  $^1\text{H}$  NMR shielding tensors were calculated using the GIAO method on Q-Chem 4.0.1<sup>4</sup> with BP86/6-31G\*\* on the optimized geometry at BP86/6-31G. The chemical shifts of protons were obtained by subtracting the shielding tensors from the tensor of tetramethylsilane calculated at the same theoretical level. The average values were applied to the chemically identical protons.

**Calculations for reaction models.** All ground state structures of models were optimized at the theoretical level of BP86/6-31G using Q-Chem or ORCA 3.0.3<sup>5</sup>. Frequency calculations were conducted on ORCA at BP86/6-31G\* (instead of 6-31G\*\* to minimize the calculation cost), and the Gibbs free enthalpies were obtained. The optimized structures that were located at the minimum on the potential surface were confirmed by the absence of imaginary frequencies. Transition state (TS) structures between reactants and products were obtained by using the climbing image nudged elastic band (CI-NEB) method implemented in the atomistic simulation environment (ASE<sup>6</sup>) using ORCA as a calculator with a PM3 semi-empirical method. The TS structures were further optimized at BP86/6-31G on ORCA and were confirmed by a single imaginary frequency at BP86/6-31G\*. Unrestricted triplet calculations were performed for the photo-isomerization process in Fig. 5.  $^3\text{TS1}$ s were obtained at UBP86/6-31G//UBP86/6-31G\* and  $^3\text{TS2}$ s at UBP86/6-31G\* with a slow convergence strategy. The alpha spin density, single occupied molecular orbital (SOMO), and SOMO-1 of the triplet intermediate ( $^3\text{IM-Pr}$ ), were calculated at BP86/6-31G\* on Q-Chem. According to the reaction coordinates (minimum energy path), we confirmed reliability of the procedure in identifying TSs using the CI-NEB method as follows. The saddle point geometries of forward and reverse directions were generated using the imaginary vibrational mode at TSs. The geometries were optimized at BP86/6-31G and confirmed their connections to the corresponding reactants, intermediates and products, as shown in Fig. S1.

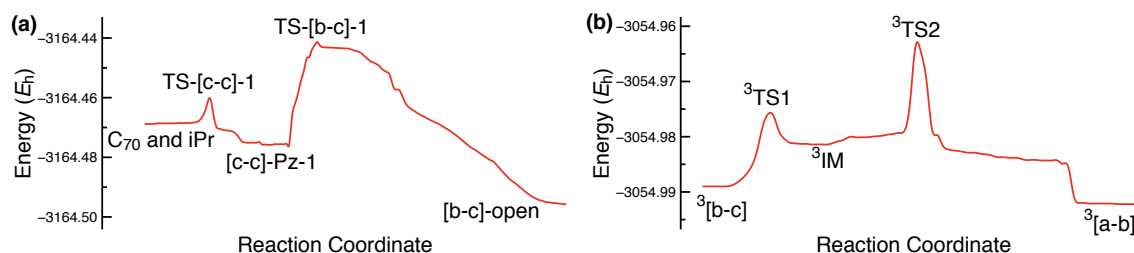

**Fig. S1** Reaction coordinates for (a) the pathway from  $\text{C}_{70}$  and iPr to [b-c]-open PCiPr via [c-c]-Pz-PCiPr-1 intermediate, and (b) the pathway of the photo-isomerization process from the triplet  $^3[\text{b-c}]$ -PCiPr to  $^3[\text{a-b}]$ -PCiPr via the  $^3\text{IM-iPr}$  biradical intermediate.

## Calibration of level of theory for NMR calculations of [60]PCBM

<sup>1</sup>H NMR chemical shifts of [60]PCBM were calculated at various conditions on the optimized geometries at BP86/6-31G, 6-31G\* and 6-31G\*\* (Table S1). The root mean square displacements (RMSD) from the experimental shifts were evaluated. BP86/6-31G/BP86/6-31G\*\* calculations gave the best result (RMSD: 0.08 ppm).

**Table S1** Calculated and experimental <sup>1</sup>H NMR chemical shifts (ppm) of [60]PCBM. The protons are labeled as depicted.

| Proton label                                                                      | Level of theory <sup>a)</sup> | Ha   | Hb   | Hc   | Hd   | He   | Hf   | Hg   | RMSD <sup>b)</sup> (*) |
|-----------------------------------------------------------------------------------|-------------------------------|------|------|------|------|------|------|------|------------------------|
| 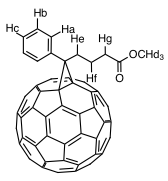 | BP86/6-31G//HF/6-31G          | 8.62 | 8.04 | 7.98 | 4.11 | 2.59 | 2.55 | 2.65 | 0.45 (0.43)            |
|                                                                                   | BP86/6-31G//B97-2/6-31G       | 8.01 | 7.49 | 7.42 | 3.88 | 2.79 | 2.47 | 2.64 | 0.15 (0.20)            |
|                                                                                   | BP86/6-31G//B97-2/6-31G (PCM) | 8.41 | 8.75 | 9.11 | 3.64 | 4.32 | 2.78 | 2.48 | 0.98 (0.04)            |
|                                                                                   | BP86/6-31G//BP86/6-31G        | 7.87 | 7.40 | 7.35 | 3.85 | 2.94 | 2.55 | 2.69 | 0.18 (0.17)            |
|                                                                                   | BP86/6-31G//B3LYP/6-31G       | 7.94 | 7.42 | 7.35 | 3.87 | 2.77 | 2.48 | 2.64 | 0.16 (0.19)            |
|                                                                                   | BP86/6-31G//HCTH/6-31G        | 7.82 | 7.34 | 7.27 | 3.80 | 2.90 | 2.52 | 2.66 | 0.19 (0.12)            |
|                                                                                   | BP86/6-31G//BOP/6-31G         | 7.76 | 7.30 | 7.25 | 3.82 | 2.86 | 2.51 | 2.64 | 0.20 (0.14)            |
|                                                                                   | BP86/6-31G//PBEOP/6-31G       | 7.76 | 7.31 | 7.25 | 3.83 | 2.88 | 2.51 | 2.64 | 0.20 (0.15)            |
|                                                                                   | BP86/6-31G//B97-2/6-31G**     | 8.09 | 7.57 | 7.49 | 3.64 | 2.68 | 2.31 | 2.36 | 0.13 (0.04)            |
|                                                                                   | BP86/6-31G//BP86/6-31G**      | 8.00 | 7.52 | 7.46 | 3.66 | 2.86 | 2.38 | 2.46 | 0.08 (0.02)            |
|                                                                                   | BP86/6-31G//BP86/6-311G**     | 8.11 | 7.76 | 7.75 | 3.83 | 3.02 | 2.32 | 2.49 | 0.17 (0.15)            |
|                                                                                   | BP86/6-31G//BP86/DZ**         | 8.38 | 7.98 | 8.00 | 3.95 | 2.98 | 2.44 | 2.49 | 0.34 (0.27)            |
|                                                                                   | BP86/6-31G//B3LYP/6-31G**     | 8.00 | 7.47 | 7.40 | 3.64 | 2.64 | 2.30 | 2.35 | 0.14 (0.04)            |
|                                                                                   | BP86/6-31G**/BP86/6-31G**     | 8.05 | 7.55 | 7.49 | 3.61 | 2.94 | 2.38 | 2.42 | 0.10 (0.07)            |
|                                                                                   | BP86/6-31G**//BP86/6-31G**    | 8.08 | 7.57 | 7.50 | 3.61 | 2.96 | 2.40 | 2.43 | 0.11 (0.07)            |
|                                                                                   | BP86/6-31G**/BP86/6-31G*      | 7.85 | 7.37 | 7.32 | 3.52 | 2.91 | 2.41 | 2.41 | 0.15 (0.16)            |
| Experimental                                                                      |                               | 7.93 | 7.55 | 7.48 | 3.68 | 2.91 | 2.19 | 2.53 | -                      |

<sup>a)</sup> Geometry optimization//NMR calculation. <sup>b)</sup> RMSD: root mean square displacement from experimental values. \* RMSD for Hd protons. PCM: polarizable continuum method.

## Validation of NMR calculation using experimental chemical shifts of [70]PCBM

<sup>1</sup>H NMR calculations at the BP86/6-31G/BP86/6-31G\*\* level of theory were validated by [70]PCBM isomers. The structures of  $\alpha$ ,  $\beta$ 1, and  $\beta$ 2 are shown in Scheme 1. The complete assignments of the chemical shifts to the isomers that are isolated by means of HPLC technique are reported in literature.<sup>7</sup> The validation results are summarized in Table S2 and Fig. S2.

**Table S2** Calculated<sup>a)</sup> and experimental <sup>1</sup>H NMR chemical shifts (ppm) of [70]PCBM isomers. The protons are labeled as denoted.

| Proton label                                                                        | Isomers                  | Ha   | Hb   | Hc   | Hd   | He   | Hf   | Hg   | RMSD <sup>b)</sup> |
|-------------------------------------------------------------------------------------|--------------------------|------|------|------|------|------|------|------|--------------------|
| 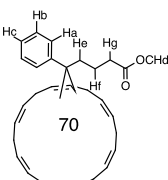 | $\alpha$ (calculated)    | 7.83 | 7.51 | 7.49 | 3.74 | 2.27 | 2.20 | 2.55 | 0.09               |
|                                                                                     | $\alpha$ (experimental)  | 7.91 | 7.53 | 7.43 | 3.68 | 2.45 | 2.15 | 2.49 | -                  |
|                                                                                     | $\beta$ 1 (calculated)   | 7.38 | 7.18 | 7.19 | 3.81 | 2.39 | 2.07 | 2.36 | 0.07               |
|                                                                                     | $\beta$ 1 (experimental) | 7.41 | 7.20 | 7.22 | 3.74 | 2.41 | 2.02 | 2.20 | -                  |
|                                                                                     | $\beta$ 2 (calculated)   | 7.71 | 7.49 | 7.48 | 3.53 | 2.07 | 1.85 | 2.23 | 0.06               |
|                                                                                     | $\beta$ 2 (experimental) | 7.78 | 7.56 | 7.50 | 3.51 | 2.02 | 1.80 | 2.12 | -                  |

<sup>a)</sup> BP86/6-31G/BP86/6-31G\*\*. <sup>b)</sup> RMSD: root mean square displacement from experimental values.

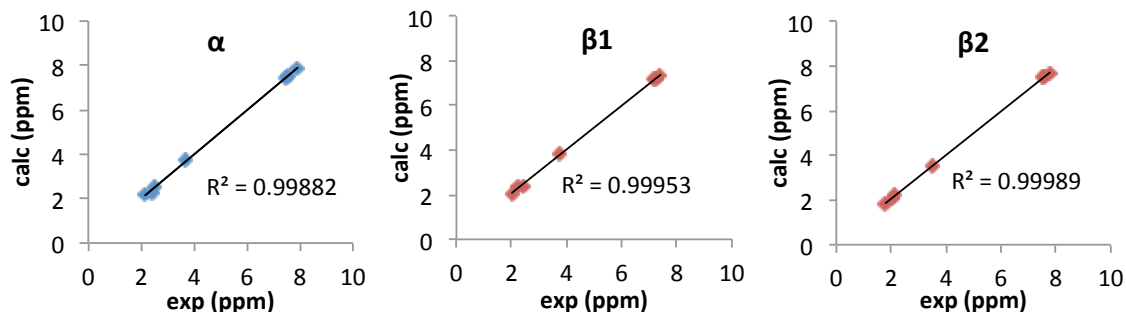

**Fig. S2** Correlations of calculated and experimental <sup>1</sup>H NMR chemical shifts of  $\alpha$ -,  $\beta$ 1-, and  $\beta$ 2-[70]PCBM (left to right).

## Assignments of $^1\text{H}$ NMR chemical shifts to [70]PCMBM isomers

The experimental  $^1\text{H}$  NMR chemical shifts of [70]PCMBM were assigned to two  $\alpha$ -diastereomers by using the predicted values at BP86/6–31G//BP86/6–31G\*\* (Table S3). The predicted chemical shifts of  $\beta$ 1-, and  $\beta$ 2-[70]PCMBM are also summarized. Experimental chemical shifts of the methyl ester protons of  $\alpha$ - and  $\beta$ -[70]PCMBM isomers are assigned as shown in Fig. 1 (b) in the main text. The three-dimensional structures of the two  $\alpha$ -diastereomers ( $\alpha$ 1 and  $\alpha$ 2) are described in Fig. S3.

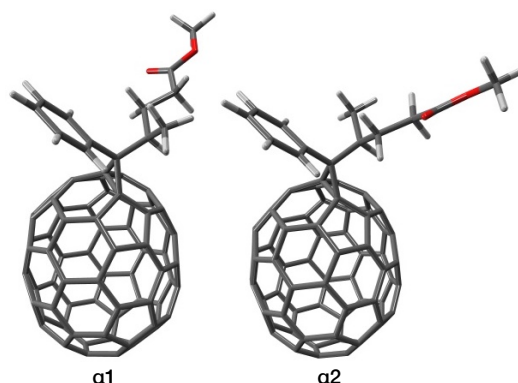

**Fig. S3** Three-dimensional structures of  $\alpha$ -[70]PCMBM diastereomers ( $\alpha$ 1 and  $\alpha$ 2).

**Table S3** Calculated<sup>a)</sup> and experimental  $^1\text{H}$  NMR chemical shifts (ppm) of [70]PCMBM isomers. The protons are labeled as denoted. Apostrophes on the labels describe the protons that exhibit different shifts due to the stereo environment.

| Proton label                                                                       | Isomers            | Ha   | Ha'  | Hb   | Hb'  | Hc   | Hd   | He   | Hf   | Hf'  | Hg   | Hg'  | Hh   | RMSD <sup>b)</sup> |
|------------------------------------------------------------------------------------|--------------------|------|------|------|------|------|------|------|------|------|------|------|------|--------------------|
| 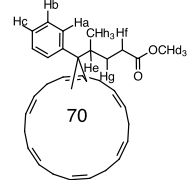 | $\alpha$ 1 (calc.) | 7.85 | 7.59 | 7.48 | 7.36 | 7.43 | 3.70 | 2.19 | 2.44 | 2.12 | 2.70 | 1.56 | 1.11 | 0.15               |
|                                                                                    | $\alpha$ 1 (exp.)  | 8.02 | 7.69 | 7.56 | 7.44 | 7.44 | 3.77 | 2.48 | 2.56 | 2.31 | 2.72 | 1.73 | 1.33 | -                  |
|                                                                                    | $\alpha$ 2 (calc.) | 7.85 | 7.81 | 7.48 | 7.46 | 7.45 | 3.64 | 2.28 | 2.16 | 2.53 | 2.52 | 1.77 | 1.22 | 0.15               |
|                                                                                    | $\alpha$ 2 (exp.)  | 7.99 | 7.73 | 7.56 | 7.44 | 7.44 | 3.61 | 2.48 | 2.48 | 2.57 | 2.65 | 1.82 | 1.51 | -                  |
|                                                                                    | $\beta$ 1 (calc.)  | 7.37 | 7.47 | 7.20 | 7.17 | 7.21 | 3.68 | 2.44 | 2.51 | 2.31 | 1.67 | 2.50 | 1.19 | -                  |
|                                                                                    | $\beta$ 2 (calc.)  | 7.82 | 7.67 | 7.43 | 7.47 | 7.44 | 3.55 | 2.05 | 1.83 | 2.26 | 2.45 | 1.45 | 0.92 | -                  |

<sup>a)</sup> BP86/6–31G//BP86/6–31G\*\*. <sup>b)</sup> RMSD: root mean square displacement from experimental values.

## References

- 1 J. C. Hummelen, B. Knight, F. LePeq and F. Wudl, *J. Org. Chem.*, 1995, **60**, 532–538.
- 2 M. M. Wienk, J. M. Kroon, W. J. H. Verhees, J. Knol, J. C. Hummelen, P. A. van Hal and R. A. J. Janssen, *Angew. Chem. Int. Ed. Engl.*, 2003, **42**, 3371–3375.
- 3 S. P. France, S. Hussain, A. M. Hill, L. J. Hepworth, R. M. Howard, K. R. Mulholland, S. L. Flitsch and N. J. Turner, *ACS Catal.*, 2016, **6**, 3753–3759.
- 4 Y. Shao, Z. Gan, E. Epifanovsky, A. T. B. Gilbert, M. Wormit, J. Kussmann, A. W. Lange, A. Behn, J. Deng, X. Feng, D. Ghosh, M. Goldey, P. R. Horn, L. D. Jacobson, I. Kaliman, R. Z. Khaliullin, T. Kuš, A. Landau, J. Liu, E. I. Proynov, Y. M. Rhee, R. M. Richard, M. A. Rohrdanz, R. P. Steele, E. J. Sundstrom, H. L. Woodcock III, P. M. Zimmerman, D. Zuev, B. Albrecht, E. Alguire, B. Austin, G. J. O. Beran, Y. A. Bernard, E. Berquist, K. Brandhorst, K. B. Bravaya, S. T. Brown, D. Casanova, C.-M. Chang, Y. Chen, S. H. Chien, K. D. Closser, D. L. Crittenden, M. Diedenhofen, R. A. DiStasio Jr, H. Do, A. D. Dutoi, R. G. Edgar, S. Fatehi, L. Fusti-Molnar, A. Ghysels, A. Golubeva-Zadorozhnaya, J. Gomes, M. W. D. Hanson-Heine, P. H. P. Harbach, A. W. Hauser, E. G. Hohenstein, Z. C. Holden, T.-C. Jagau, H. Ji, B. Kaduk, K. Khistyayev, J. Kim, J. Kim, R. A. King, P. Klunzinger, D. Kosenkov, T. Kowalczyk, C. M. Krauter, K. U. Lao, A. D. Laurent, K. V. Lawler, S. V. Levchenko, C. Y. Lin, F. Liu, E. Livshits, R. C. Lochan, A. Luenser, P. Manohar, S. F. Manzer, S.-P. Mao, N. Mardirossian, A. V. Marenich, S. A. Maurer, N. J. Mayhall, E. Neuscamman, C. M. Oana, R. Olivares-Amaya, D. P. O'Neill, J. A. Parkhill, T. M. Perrine, R. Peverati, A. Prociuk, D. R. Rehn, E. Rosta, N. J. Russ, S. M. Sharada, S. Sharma, D. W. Small, A. Sodt, T. Stein, D. Stück, Y.-C. Su, A. J. W. Thom, T. Tsuchimochi, V. Vanovschi, L. Vogt, O. Vydrov, T. Wang, M. A. Watson, J. Wenzel, A. White, C. F. Williams, J. Yang, S. Yeganeh, S. R. Yost, Z.-Q. You, I. Y. Zhang, X. Zhang, Y. Zhao, B. R. Brooks, G. K. L. Chan, D. M. Chipman, C. J. Cramer, W. A. Goddard III, M. S. Gordon, W. J. Hehre, A. Klamt, H. F. Schaefer III, M. W. Schmidt, C. D. Sherrill, D. G. Truhlar, A. Warshel, X. Xu, A. Aspuru-Guzik, R. Baer, A. T. Bell, N. A. Besley, J.-D. Chai, A. Dreuw, B. D. Dunietz, T. R. Furlani, S. R. Gwaltney, C.-P. Hsu, Y. Jung, J. Kong, D. S. Lambrecht, W. Liang, C. Ochsenfeld, V. A. Rassolov, L. V. Slipchenko, J. E. Subotnik, T. Van Voorhis, J. M. Herbert, A. I. Krylov, P. M. W. Gill and M. Head-Gordon, *Mol. Phys.*, 2014, **113**, 184–215.
- 5 F. Neese, *WIREs Comput Mol Sci*, 2011, **2**, 73–78.
- 6 A. H. Larsen, J. J. Mortensen, J. Blomqvist, I. E. Castelli, R. Christensen, M. Dulak, J. Friis, M. N. Groves, B. Hammer, C. Hargus, E. D. Hermes, P. C. Jennings, P. B. Jensen, J. Kermode, J. R. Kitchin, E. L. Kolsbjerg, J. Kubal, K. Kaasbjerg, S. Lysgaard, J. B. Maronsson, T. Maxson, T. Olsen, L. Pastewka, A. Peterson, C. Rostgaard, J. Schiøtz, O. Schütt, M. Strange, K. S. Thygesen, T. Vegge, L. Vilhelmsen, M. Walter, Z. Zeng and K. W. Jacobsen, *J. Phys.: Condens. Matter*, 2017, **29**, 273002.
- 7 T. Umeyama, T. Miyata, A. C. Jakowetz, S. Shibata, K. Kurotobi, T. Higashino, T. Koganezawa, M. Tsujimoto, S. Gélinas, W. Matsuda, S. Seki, R. H. Friend and H. Imahori, *Chem. Sci.*, 2017, **8**, 181–188.

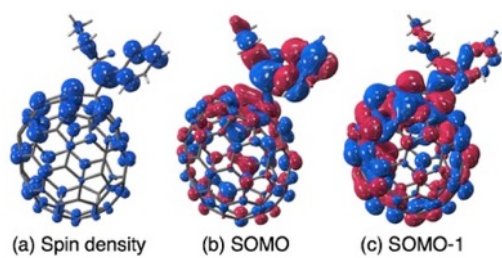

**Fig. S4** Biradical nature of triplet intermediate ( $^3\text{IM-Pr}$ ) on the pathway from  $^3[\text{b-c}]\text{-PCPr}$  to  $^3[\text{a-b}]\text{-PCPr}$ . **(a)** Alpha spin density map calculated at BP86/6–31G\*. **(b), (c)** SOMO and SOMO-1 orbitals.

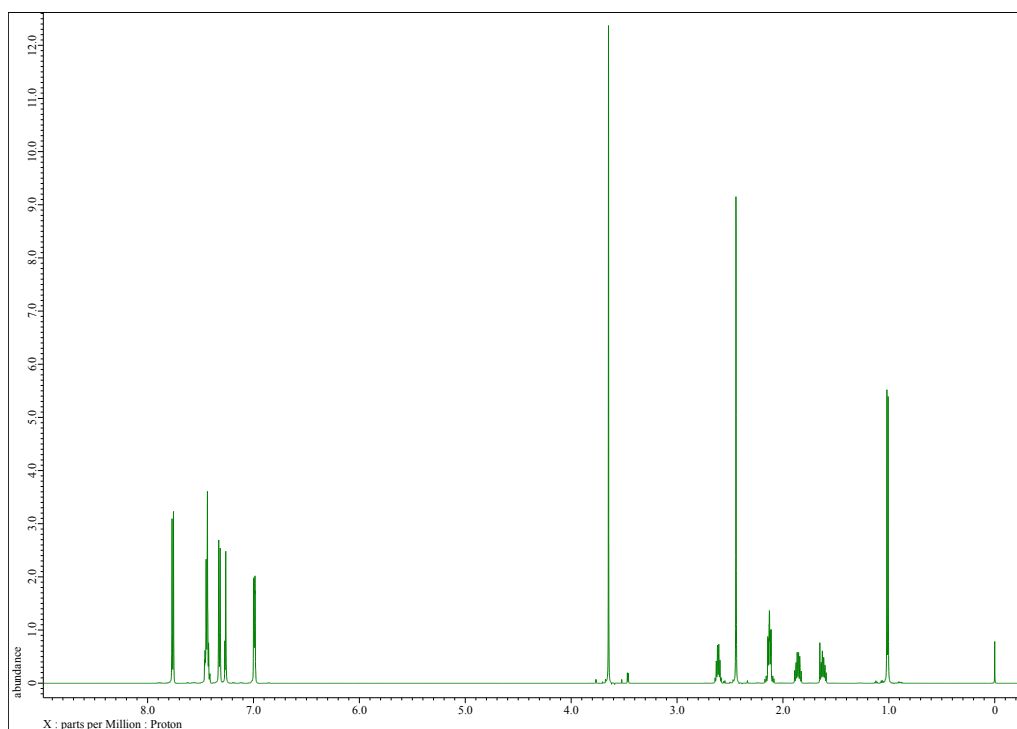

**Fig. S5**  $^1\text{H}$  NMR spectrum of **1b** (600 MHz,  $\text{CDCl}_3$ ).

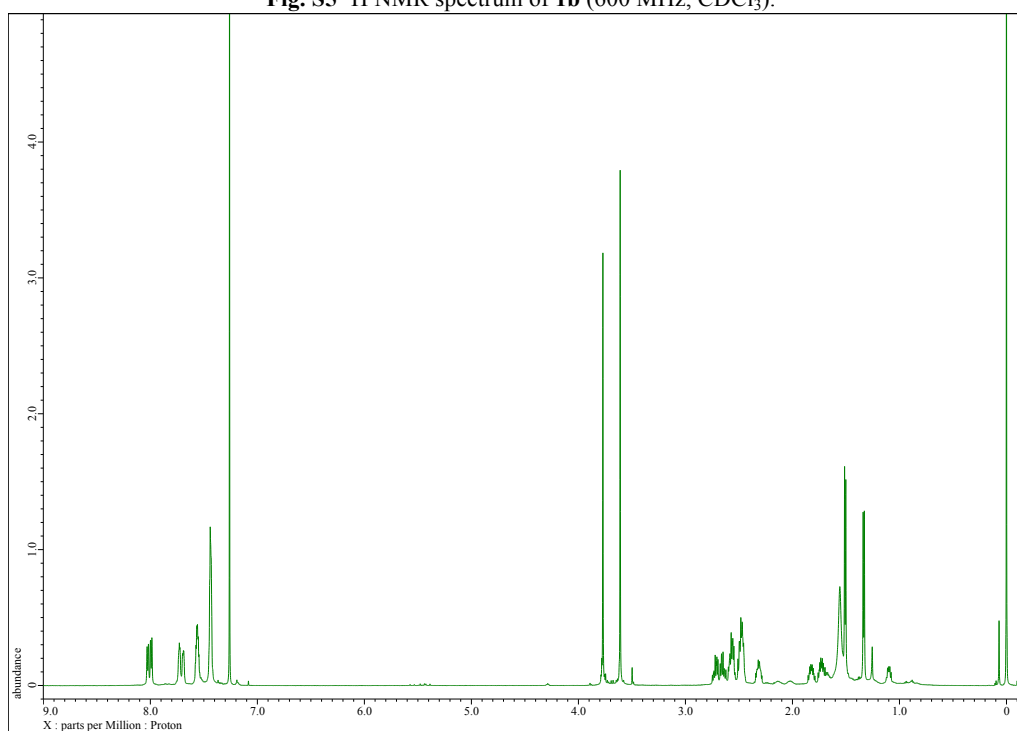

**Fig. S6**  $^1\text{H}$  NMR spectrum of **2b** (600 MHz,  $\text{CDCl}_3$ ).

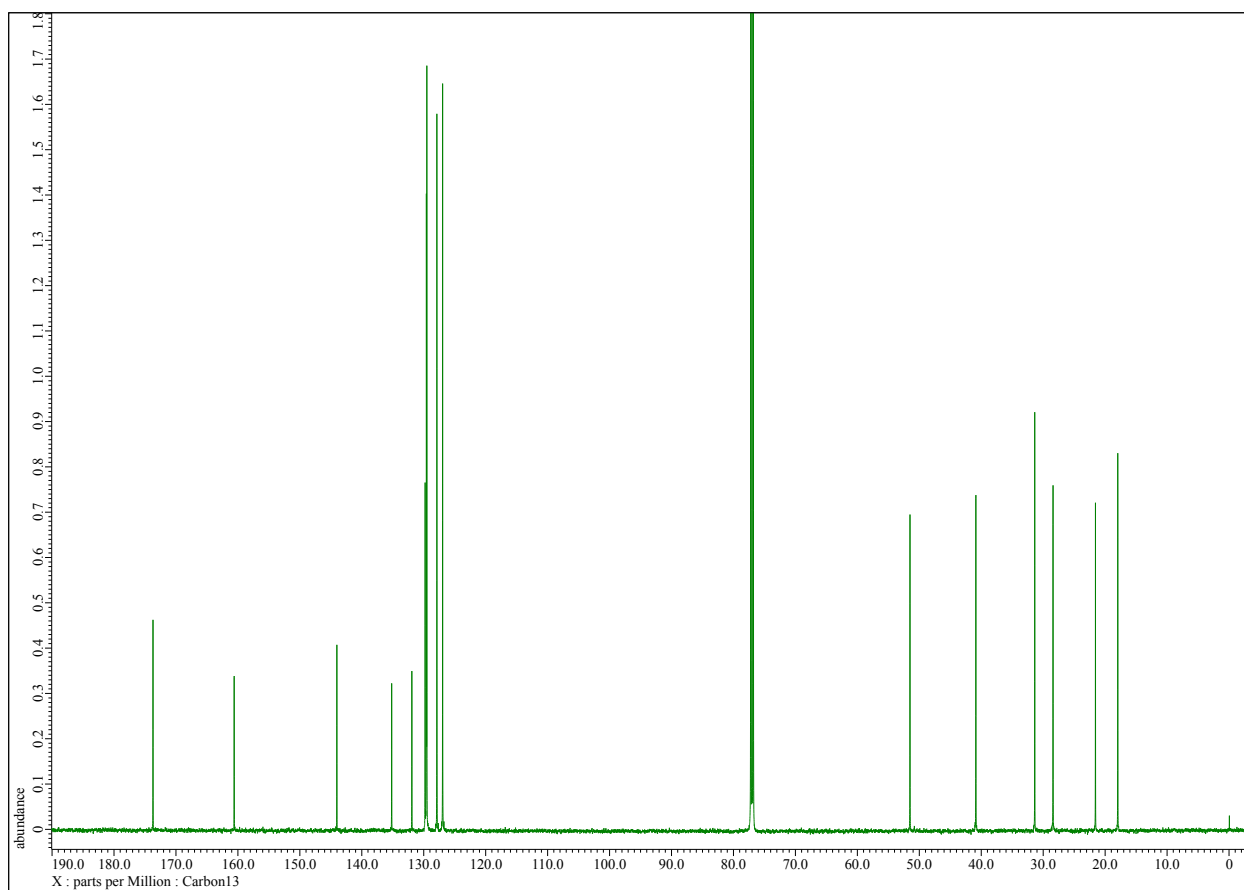

**Fig. S7**  $^{13}\text{C}$  NMR spectrum of **1b** (151 MHz,  $\text{CDCl}_3$ ).

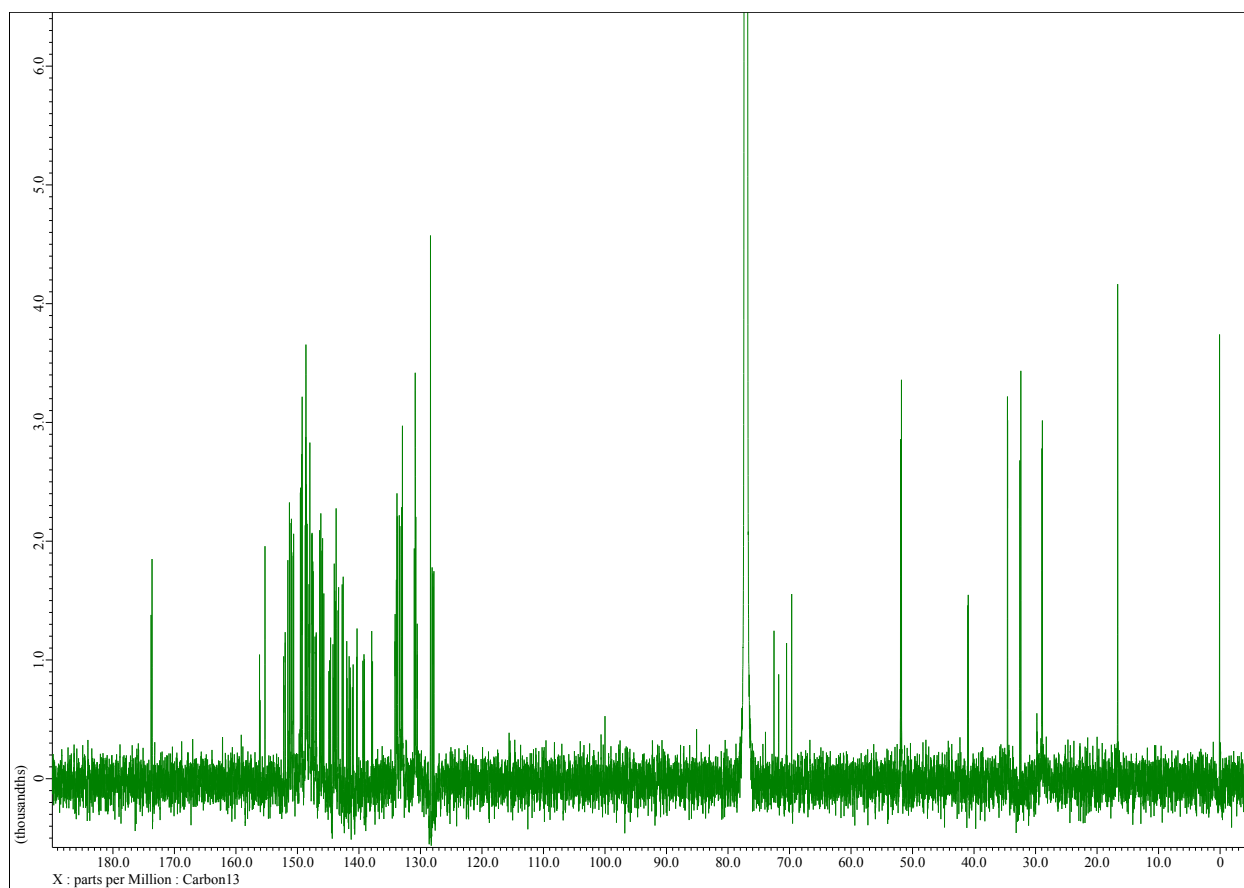

**Fig. S8**  $^{13}\text{C}$  NMR spectrum of **2b** (151 MHz,  $\text{CDCl}_3$ ).

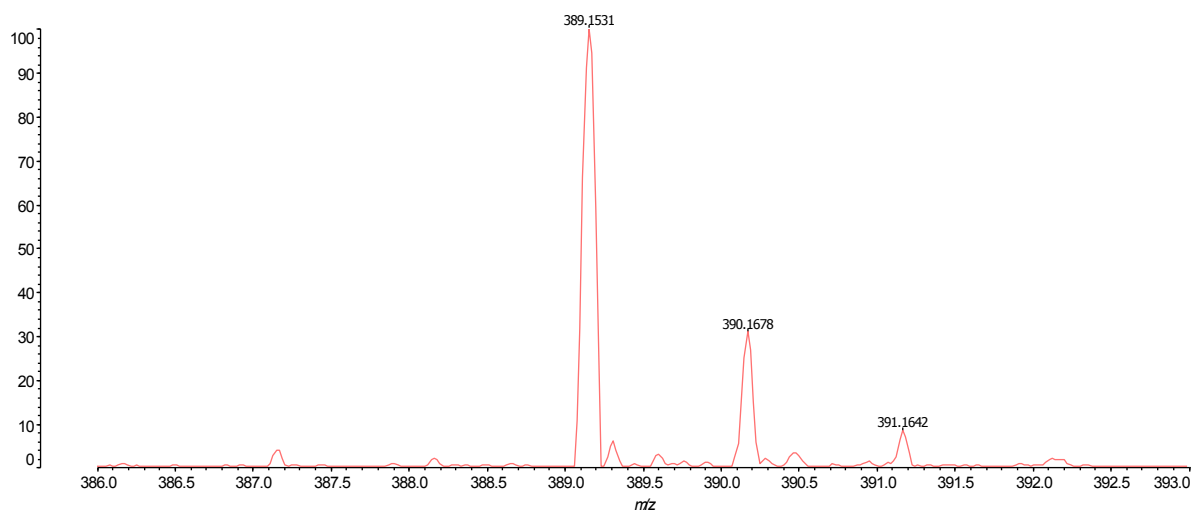

**Fig. S9** MALDI-TOF-HRMS spectrum of **1b** (positive, matrix: Sinapinic Acid (SA)).

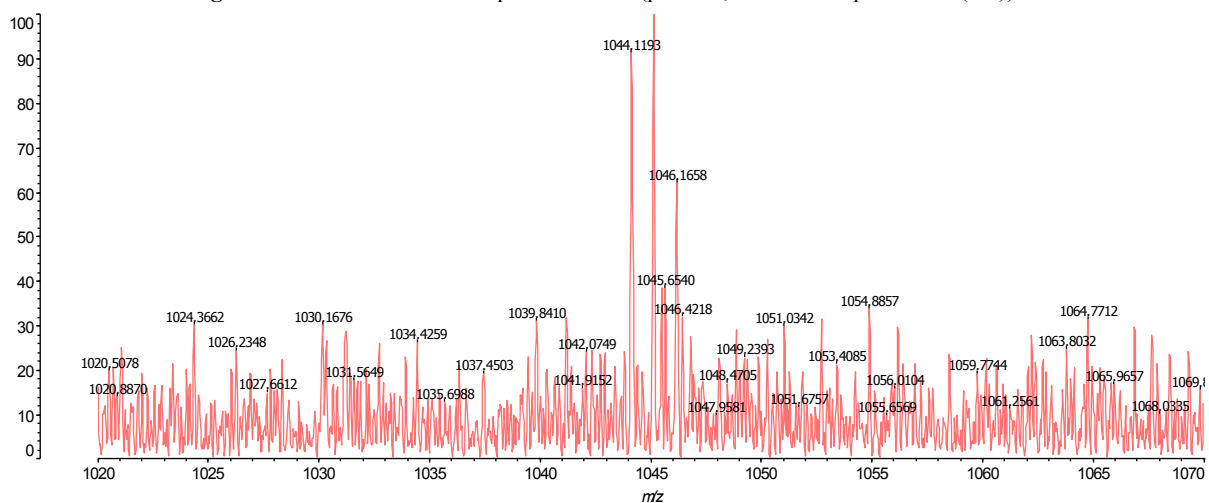

**Fig. S10** MALDI-TOF-HRMS spectrum of **2b** (negative, without matrix).

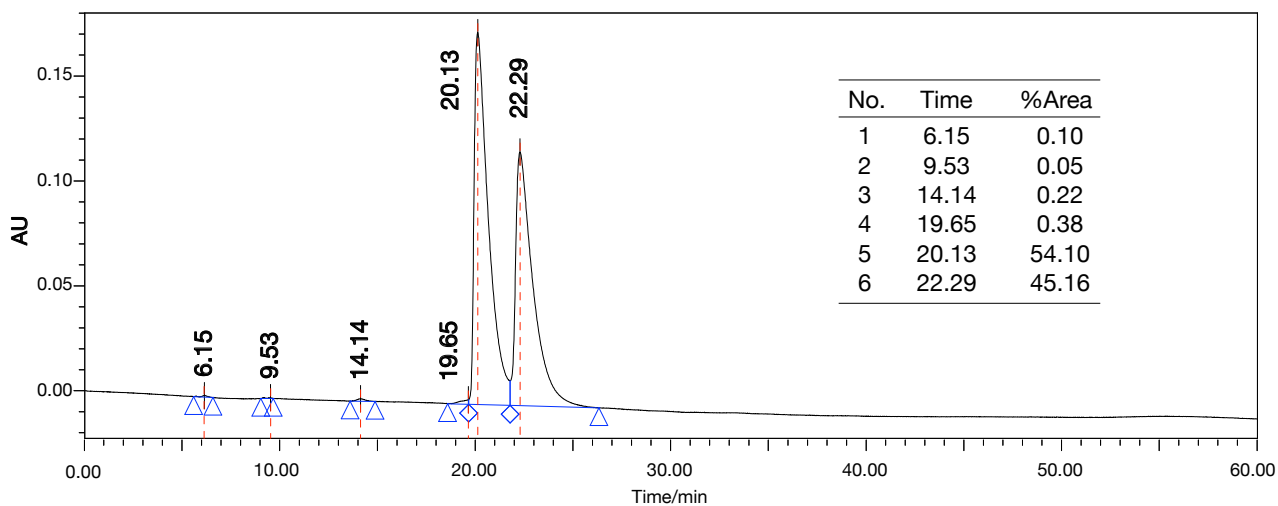

**Fig. S11** HPLC chromatogram of **2b** (Buckyprep-D column (4.6 mm I.D. × 250 mm), 30 °C, Toluene 1.0 mL/min, UV 320 nm).

**Table S4** Computational data: Cartesian coordinates optimized at BP86/6–31G, Gibbs free enthalpies and number of imaginary frequencies calculated at BP86/6–31G\*.

| Rows: Name / Gibbs free enthalpy (Eh) / Number of imaginary frequency (cm <sup>-1</sup> ) / Cartesian coordinates (Angstrom) (Atom, x, y, z) |                                 |                                 |                                  |                                   |
|----------------------------------------------------------------------------------------------------------------------------------------------|---------------------------------|---------------------------------|----------------------------------|-----------------------------------|
| [60]PCBM<br>-2901.882866<br>0                                                                                                                | α-[70]PCBM<br>-3282.967722<br>0 | β1-[70]PCBM<br>-3282.96231<br>0 | β2-[70]PCBM<br>-3282.963047<br>0 | α1-[70]PCMBM<br>-3322.250464<br>0 |
| C -3.752000 2.719000 -0.238000                                                                                                               | C 0.428940 1.990050 -2.273140   | C -2.545840 0.768110 -2.317120  | C -1.870320 -1.206130 3.209180   | C 0.269430 1.928620 -2.276220     |
| C -2.888000 2.874000 -1.413000                                                                                                               | C -0.200730 0.773740 -2.885420  | C -2.283210 -0.431790 -3.111070 | C -1.026050 -2.400090 3.181890   | C -0.306780 0.663330 -2.855710    |
| C -3.308000 1.891000 -2.417000                                                                                                               | C -1.602830 0.756080 -2.352370  | C -2.457560 -1.596310 -2.242840 | C 0.370680 -1.968290 3.211250    | C -1.695030 0.582250 -2.290530    |
| C -4.421000 1.122000 -1.859000                                                                                                               | C -1.866770 2.037500 -1.713900  | C -2.837450 -1.125200 -0.910270 | C 0.481000 -0.506120 3.265660    | C -2.012290 1.858890 -1.665530    |
| C -4.696000 1.634000 -1.531000                                                                                                               | C -0.621670 2.795310 -1.666840  | C -2.895360 0.356840 -0.957090  | C -1.003260 -0.027660 3.267000   | C -0.806870 2.608700 -1.658370    |
| C -4.139000 -2.418000 -1.252000                                                                                                              | C 1.784720 1.984940 -1.692110   | C -1.771810 1.928460 -2.537530  | C -3.062090 -1.183140 2.452580   | C 1.556270 1.991390 -1.726230     |
| C -4.907000 -1.182000 -1.053000                                                                                                              | C 1.981750 2.828320 -0.532570   | C -1.291240 2.695850 -1.403780  | C -3.409340 0.005860 1.698120    | C 1.815620 2.866570 -0.586540     |
| C -4.529000 -0.258000 -2.125000                                                                                                              | C 0.979740 3.646790 0.014950    | C -1.608780 2.273530 -0.103340  | C -2.554600 1.118760 1.735400    | C 0.784850 3.641290 -0.028100     |
| C -3.527000 -0.922000 -2.964000                                                                                                              | C -0.350280 3.634730 0.563560   | C -2.461170 1.123450 0.132610   | C -1.362420 1.128990 2.562550    | C -0.555610 3.508970 -0.574690    |
| C -3.287000 -2.259000 -2.408000                                                                                                              | C -1.304940 3.730690 0.537410   | C -2.062660 0.538850 1.545290   | C -0.375280 2.044960 1.908810    | C -1.488480 3.613470 -0.547580    |
| C -0.959000 3.337000 0.094000                                                                                                                | C -2.502100 3.002050 0.492340   | C -1.999050 1.098880 1.503570   | C 1.171000 1.522560 1.910760     | C -2.646120 2.822380 0.542240     |
| C 0.396000 2.786000 0.097000                                                                                                                 | C -2.794220 1.247180 -0.655290  | C -2.349350 -1.787170 0.225120  | C 1.390600 0.191000 2.559660     | C -2.918190 1.935050 -0.585230    |
| C 0.673000 2.267000 -1.267000                                                                                                                | C -3.448310 0.955230 -0.150040  | C -1.413450 -2.885020 0.062000  | C 2.329800 -0.543210 1.735220    | C -3.497880 0.719660 -0.046850    |
| C -0.517000 2.510000 -1.070000                                                                                                               | C -3.152240 -0.292470 -0.723480 | C -1.063800 -3.362090 -1.210330 | C 2.332220 -1.946360 1.701520    | C -3.151920 -0.520290 -0.608700   |
| C -1.522000 3.171000 -1.248000                                                                                                               | C -2.214680 -0.395960 -1.837460 | C -1.596320 -2.705590 -2.389180 | C 1.331360 -2.676710 2.455570    | C -2.235150 -0.592150 -1.743590   |
| C -1.484000 -3.521000 -1.239000                                                                                                              | C -1.457140 -1.647010 -1.638820 | C -0.852850 -2.688360 -3.387200 | C 0.934030 -3.822050 1.638260    | C -1.409620 -1.799630 -1.545010   |
| C -1.986000 -2.800000 -2.414000                                                                                                              | C -0.099270 -1.726680 -1.958010 | C -0.364180 -1.570990 -2.216630 | C -0.406920 -4.229880 1.611790   | C -0.057410 -1.814330 -1.897940   |
| C -0.875000 -2.026000 -2.975000                                                                                                              | C 0.646290 -0.635100 -2.651490  | C -1.260580 -0.424560 -0.084290 | C -1.404350 -3.515090 2.404420   | C 0.614030 -0.694280 -2.624990    |
| C 0.306000 -2.270000 -2.142000                                                                                                               | C 2.456600 0.730790 -1.495970   | C -0.702930 1.928160 -3.535660  | C -3.444510 -2.333580 1.635120   | C 2.376180 0.780460 -1.528830     |
| C -0.066000 -3.191000 -1.077000                                                                                                              | C 1.919040 -0.498670 -1.882750  | C -0.452040 0.774170 -4.290420  | C -2.631490 -3.475700 1.611230   | C 1.894400 -0.481080 -1.884080    |
| C -2.360000 -3.673000 -0.105000                                                                                                              | C 0.853590 3.771530 1.465040    | C -0.597250 2.338610 0.943800   | C -2.291730 1.870290 0.515340    | C 0.685160 3.782110 1.422830      |
| C -1.740000 -3.501000 1.237000                                                                                                               | C 1.794270 3.159600 2.352680    | C 0.696660 2.909350 0.699690    | C -2.956910 1.551830 -0.715070   | C 1.676290 2.339050 2.296540      |
| C -2.750000 -2.846000 2.074000                                                                                                               | C 2.859980 2.307190 1.775630    | C 1.033640 3.345720 -0.702480   | C -3.851360 0.375410 -0.757240   | C 2.771840 2.428900 1.707550      |
| C -3.933000 -2.602000 1.249000                                                                                                               | C 2.899490 2.125760 0.353980    | C 0.051670 3.184980 -1.701480   | C -4.019420 -0.398610 0.453560   | C 2.787520 2.226280 0.288690      |
| C -3.658000 -3.113000 -0.099000                                                                                                              | C -2.995410 2.344390 1.697150   | C -0.686060 -1.659940 1.929630  | C 1.806360 1.423390 0.560220     | C -3.077510 2.159490 1.767910     |
| C -3.216000 2.878000 -1.054000                                                                                                               | C -2.330900 2.494950 2.958160   | C 0.375590 -0.899940 2.511140   | C 1.252450 1.970120 -0.638580    | C -3.292980 2.364580 3.010570     |
| C -3.603000 1.953000 1.224000                                                                                                                | C -1.065220 3.265120 3.006010   | C 0.319950 0.590260 2.463220    | C -0.162830 2.447730 -0.639860   | C -1.168540 3.199930 3.016020     |
| C -2.140000 1.704000 2.953000                                                                                                                | C -0.559350 3.826600 1.787900   | C -0.794350 1.229310 1.836850   | C -0.936400 2.350280 0.558270    | C -0.721160 3.768540 1.778530     |
| C -1.309000 2.475000 2.390000                                                                                                                | C -2.999710 -1.458990 0.135210  | C 0.313290 -3.767170 -1.479590  | C 2.571400 -2.638850 0.440050    | C -2.919150 -1.1663580 0.262850   |
| C -1.796000 3.198000 1.223000                                                                                                                | C -3.221830 -1.388280 1.505070  | C 1.301610 -3.789620 -0.444430  | C 2.912190 -1.923580 -0.752170   | C -3.111640 -1.581980 1.682300    |
| C -2.345000 1.256000 -3.224000                                                                                                               | C -3.516280 -0.068910 2.155530  | C 0.929500 -3.292870 0.898300   | C 2.921430 -0.444800 -0.711350   | C -3.460730 -0.877090 2.274280    |
| C -0.924000 1.575000 -3.058000                                                                                                               | C -3.579520 1.076690 1.300120   | C -0.403570 -2.805950 1.109160  | C 2.584230 0.213640 0.517790     | C -3.602880 0.850790 1.403790     |
| C -0.165000 0.344000 -3.232000                                                                                                               | C 0.803350 -2.385800 -1.032180  | C 0.978400 -1.080590 -4.515010  | C -1.017640 -4.634100 0.349120   | C 0.898940 -2.410550 -0.982640    |
| C -1.106000 -0.745000 -3.509000                                                                                                              | C 0.337770 -3.116020 0.107920   | C 2.147710 -1.765630 -0.049320  | C -0.256730 -4.706800 -0.862390  | C -0.499040 -3.146120 0.179760    |
| C -2.458000 -0.180000 -3.503000                                                                                                              | C -1.100610 -3.069130 0.423130  | C 0.946720 -2.947330 -3.172840  | C 1.159360 -4.274150 -0.836740   | C -0.931850 -3.167360 0.529070    |
| C -5.068000 0.744000 0.517000                                                                                                                | C -1.952260 -2.289610 -0.424430 | C 1.674340 -3.354590 -8.272970  | C 1.709600 -3.802950 0.400810    | C -1.847220 -2.447360 -0.309810   |
| C -5.172000 -0.692000 0.241000                                                                                                               | C 3.187120 0.833200 -0.235830   | C 0.415590 2.714120 -0.021930   | C -4.045340 -1.846420 0.396680   | C 3.128320 0.949660 -0.288320     |
| C -4.677000 -1.416000 1.415000                                                                                                               | C 3.443890 -0.309550 0.590010   | C 1.774520 2.386280 -3.343050   | C -3.896760 -2.557290 -0.840350  | C 3.463800 -0.173070 0.546940     |
| C -4.269000 -0.430000 2.418000                                                                                                               | C 2.841760 -1.595940 0.200540   | C 0.237470 1.167590 -4.143220   | C -3.037960 -3.762790 -0.864510  | C 2.920560 -1.495310 0.190490     |
| C -4.510000 0.987000 1.862800                                                                                                                | C 2.048540 -1.633670 -0.986770  | C -0.924810 0.368290 -0.561050  | C -2.391730 -4.168980 0.348660   | C 2.094810 -1.593810 0.196490     |
| C -2.356000 -1.960000 0.041000                                                                                                               | C 3.126010 1.236010 2.567650    | C 2.402460 3.294070 -1.007280   | C -3.997410 -0.327870 -1.995580  | C 3.370400 1.398850 2.502010      |
| C -0.938000 -1.569000 3.203000                                                                                                               | C 2.986940 1.018900 3.942840    | C 3.463690 2.917190 -0.159480   | C -3.360770 0.150290 -3.218780   | C 2.977490 1.181870 3.890460      |
| C -0.838000 -0.141000 3.476000                                                                                                               | C 1.932460 1.819760 4.486550    | C 1.339910 2.511620 1.144450    | C -2.521200 1.273980 -3.177800   | C 1.934540 1.937020 4.445720      |
| C -2.191000 0.423000 3.488000                                                                                                                | C 1.322510 2.866880 3.672860    | C 1.741300 2.469310 1.562640    | C -2.855590 1.953720 -1.905950   | C 1.251170 2.938730 3.632340      |
| C -3.131000 -0.567000 3.217000                                                                                                               | C -0.090930 2.919900 3.996560   | C 1.559080 1.312760 2.421310    | C -0.898580 2.379240 -1.869320   | C -0.154900 2.921460 3.987740     |
| C 2.131000 0.382000 -0.344000                                                                                                                | C -0.355940 1.898170 5.006700   | C 2.849950 0.641670 2.535200    | C -0.276510 1.964470 -3.121980   | C -0.342250 1.904960 5.020150     |
| C 1.820000 -1.073000 -0.556000                                                                                                               | C -1.553840 1.170570 4.962400   | C 2.908200 -0.757800 2.580730   | C 1.049610 1.513380 -3.120080    | C -1.500760 1.115020 5.014990     |
| C 1.209000 -1.223000 -1.871000                                                                                                               | C -2.527310 1.439890 3.906080   | C 1.665570 1.529050 2.512800    | C 1.794240 1.464960 1.866560     | C -2.511450 1.315980 3.978190     |
| C 0.968000 0.118000 -2.425000                                                                                                                | C -3.113350 0.173400 3.509350   | C 1.936030 -2.720780 1.728560   | C 2.633690 0.281630 1.902240     | C -3.040060 0.014630 3.614590     |
| C 1.422000 1.099000 -1.458000                                                                                                                | C -2.507670 -0.876980 4.322440  | C 3.334140 -2.684970 1.310810   | C 2.406810 -0.401210 3.172650    | C -2.361460 -0.985980 4.428770    |
| C 0.230000 0.596000 -2.927000                                                                                                                | C -2.233790 -2.128310 3.751640  | C 3.690760 -3.147450 0.304220   | C 2.889030 -1.803350 -3.214780   | C -2.036080 -2.234640 3.870810    |
| C 1.265000 -0.051000 2.133000                                                                                                                | C -2.552730 -2.372130 2.347990  | C 2.663730 -3.662290 -0.865540  | C 2.598890 -2.569080 -1.990670   | C -2.374340 -2.516940 2.478420    |
| C 0.182000 0.954000 1.168000                                                                                                                 | C -1.503900 3.203150 1.790610   | C 2.997340 -3.246390 -2.215570  | C 1.731750 -3.732050 -2.032230   | C -1.295750 -3.299640 1.907820    |
| C 0.875000 2.211900 1.231000                                                                                                                 | C -0.534000 3.475710 2.846240   | C 4.231300 -2.470380 -2.149890  | C 0.981900 -3.683660 -3.282950   | C -0.288970 -3.504220 2.943800    |
| C -0.009000 1.929000 2.373000                                                                                                                | C 0.836030 -3.527270 2.542020   | C 3.957520 -1.354010 -2.982470  | C -0.357510 -4.099690 -3.309660  | C 1.074050 -3.490550 2.607550     |
| C 0.480000 -3.015000 0.213000                                                                                                                | C 1.276690 -3.301300 1.171090   | C 3.332210 -0.973300 -3.904410  | C -0.993720 -4.570780 -2.083500  | C 1.471070 -3.264620 1.223100     |
| C 1.432000 -1.936000 0.479000                                                                                                                | C 2.517400 -2.548500 1.217410   | C 3.278070 0.476210 -3.951110   | C -2.368180 -4.104280 -2.084820  | C 2.670210 -2.446630 1.228900     |
| C 1.152000 -1.418000 1.843000                                                                                                                | C 2.845750 -2.306520 2.616870   | C 4.309580 0.993020 -3.057490   | C -2.583190 -3.343590 -3.311550  | C 3.017880 -2.165450 2.616100     |
| C 0.035000 -2.188000 2.389000                                                                                                                | C 3.413660 -1.078490 2.993090   | C 4.057700 2.143900 -2.296820   | C 3.392500 -2.197750 -3.286670   | C 3.529790 -0.903990 2.960740     |
| C -0.378000 -3.174000 1.389000                                                                                                               | C 3.674380 -0.058030 1.981860   | C 2.769590 2.701920 -2.089970   | C -4.019350 -1.778920 -2.037070  | C 3.714280 0.112000 1.928700      |
| C 3.229000 0.959000 0.557000                                                                                                                 | C 0.912400 -0.164050 5.589810   | C 4.839690 0.898190 1.038190    | C -0.918420 0.173380 4.728580    | C 1.044880 -0.878970 5.608220     |
| C 3.823000 2.304000 0.185000                                                                                                                 | C 1.972520 -1.000650 5.022260   | C 5.180280 1.123830 -0.321930   | C -1.795200 -0.998690 -4.772680  | C 2.134150 -0.868800 5.021890     |
| C 3.996000 3.292000 1.181000                                                                                                                 | C 2.973460 -0.415660 4.219050   | C 4.503520 2.213490 -0.906700   | C -2.994470 -1.005750 4.032580   | C 3.084090 -2.245090 4.186680     |
| C 4.290000 2.561000 -1.124000                                                                                                                | C 0.337720 -0.923620 5.541890   | C 4.894700 -0.762500 1.084520   | C 0.468800 -0.297680 -4.728190   | C -0.164390 -0.902860 5.595650    |
| C 4.916000 3.785000 -1.430000                                                                                                                | C 0.898560 1.222380 5.327370    | C 3.838140 1.385970 1.756090    | C -1.278690 1.288710 3.944110    | C 0.953390 1.300660 5.320930      |
| C 4.621000 4.514000 0.874000                                                                                                                 | C -0.052080 -2.229630 4.944850  | C 5.268430 -1.244230 -0.246590  | C 0.449650 -1.761730 -4.773410   | C 0.175780 -2.201450 5.011440     |
| C 5.082000 4.764000 -0.433000                                                                                                                | C -1.546890 -0.264060 5.236280  | C 3.945570 -1.473840 1.846920   | C -0.949810 -2.195420 -4.799880  | C -1.413490 -0.312590 5.309810    |
| H 4.159000 1.806000 -1.905000                                                                                                                | C 1.377040 -2.279900 4.625850   | C 5.443720 -0.079080 -1.117220  | C 1.395000 -2.497470 -4.029730   | C 1.597120 -2.182330 4.658230     |
| H 5.270000 3.971000 -2.449000                                                                                                                | C -0.987010 -2.820920 4.070960  | C 4.677150 -2.417410 1.0758770  | C -1.340930 -3.343920 -4.082400  | C -0.746810 -2.854770 4.169290    |
| H 3.632000 3.105000 2.197000                                                                                                                 | C 1.810190 -2.919650 3.447800   | C 5.015930 -0.137800 -2.459080  | C 0.749240 2.815740 2.618940     | C 2.036050 -2.818430 3.480510     |
| H 4.744000 5.272000 1.654000                                                                                                                 | C 0.347840 -0.057750 -4.044080  | C -2.951880 -0.281600 2.395720  | C 1.182150 4.164090 2.007300     | C 0.265920 -0.150270 -4.019640    |
| H 5.565000 5.716000 -0.673000                                                                                                                | C 1.521130 0.495440 -4.829910   | C -4.455940 0.363670 2.062910   | H 0.948570 4.193130 0.929370     | C 1.400940 4.070930 -4.812040     |
| C 4.251000 -0.028000 1.159000                                                                                                                | C 1.505290 1.815700 -5.332950   | H -4.594220 -0.582350 0.990510  | H 0.571640 4.953040 2.491260     | C 1.272520 1.                     |

|             |           |           |             |           |           |             |           |           |             |           |           |             |           |           |
|-------------|-----------|-----------|-------------|-----------|-----------|-------------|-----------|-----------|-------------|-----------|-----------|-------------|-----------|-----------|
| C 0.717540  | 2.078460  | -2.307200 | C -2.564270 | 0.617970  | -2.394530 | C -1.944780 | -1.338450 | 3.198080  | C 1.245600  | -0.000090 | 3.998450  | C 1.097820  | -0.872650 | 0.129990  |
| C 0.104930  | 0.913090  | -3.029570 | C -2.277310 | -0.609420 | -3.136250 | C -1.000140 | -2.455120 | 3.161910  | C 0.385020  | 1.184330  | 3.997540  | C 0.381840  | -1.348920 | 1.239580  |
| C -1.316670 | 0.870730  | -2.549040 | C -2.441980 | -1.740640 | -2.223530 | C 0.352610  | -1.907550 | 3.261540  | C -1.007500 | 0.732300  | 3.998150  | C -1.010980 | -1.533050 | 1.171700  |
| C -1.596020 | 2.101850  | -1.824240 | C -2.839340 | -1.222910 | -0.914080 | C 0.253840  | -0.451630 | 3.371350  | C -1.007530 | -0.732060 | 3.998020  | C -1.683230 | -1.231120 | -0.027110 |
| C -0.348870 | 2.843320  | -1.677120 | C -2.917460 | 0.255760  | -1.020980 | C -1.185130 | -0.094630 | 3.332680  | C 0.384700  | -1.184360 | 3.997390  | C 0.977760  | -0.754090 | -1.144840 |
| C 1.972050  | 2.020510  | -1.683780 | C -1.805580 | 1.780550  | -2.654910 | C -3.180550 | -1.386730 | 2.395950  | C 2.436740  | -0.000300 | 3.244700  | C 0.430380  | -0.563840 | -1.089260 |
| C 2.211270  | 2.768710  | -0.452670 | C -1.344320 | 2.598320  | -1.548260 | C -3.527400 | -0.201510 | 1.673770  | C 2.808750  | -1.174560 | 2.459690  | C 1.155110  | -0.055650 | -2.264270 |
| C 1.195120  | 3.550860  | 0.121050  | C -1.664230 | 2.223610  | -0.234570 | C -2.772270 | 0.976640  | 1.785280  | C 1.984010  | -2.308680 | 2.459570  | H 2.181840  | -0.736360 | 0.205870  |
| C -1.113000 | 3.594100  | -0.503660 | C -2.501710 | 1.071030  | 0.041610  | C -1.616720 | 1.055370  | 2.658480  | C 0.752500  | -2.316560 | 3.243750  | H 0.924230  | -1.578810 | 2.164490  |
| C -1.105730 | 3.612080  | 0.568780  | C -2.107250 | 0.545450  | 1.388430  | C -0.689990 | 2.083230  | 2.084800  | C -0.248630 | -3.033680 | 2.459580  | H -1.563650 | -1.096150 | -2.039000 |
| C -2.305080 | 2.899300  | 0.426360  | C -2.024480 | -1.079350 | 1.505690  | C 0.891920  | 1.686080  | 2.124860  | C -1.582340 | -2.600160 | 2.459280  | H -2.767350 | -1.367780 | -0.097770 |
| C -2.560330 | 2.136790  | -0.793110 | C -0.488670 | -1.830630 | 0.252030  | C 1.204650  | 0.354830  | 2.733080  | C -1.970950 | -1.431500 | 3.243730  | H -1.525350 | -0.527540 | -2.063800 |
| C -3.237710 | 0.914580  | -0.403550 | C -1.399180 | -2.920470 | 0.138930  | C 2.235930  | -0.262610 | 1.920970  | C -2.963010 | -0.700860 | 2.459960  | C 0.505290  | 0.234390  | -3.612610 |
| C -2.929680 | -0.288410 | -1.059850 | C -1.031600 | -3.443400 | -1.110590 | C -2.359340 | -1.658150 | 1.833670  | C -2.962790 | 0.701590  | 2.459950  | H 1.146930  | 0.929770  | -4.186780 |
| C -1.953680 | -0.312990 | -2.146560 | C -1.564360 | -2.842610 | -2.319240 | C 1.397600  | -2.500960 | 2.518910  | C -1.970600 | 1.432050  | 3.243750  | H -0.445670 | 0.775140  | -3.432450 |
| C -1.208950 | -1.582220 | -2.018260 | C -0.488670 | -2.849100 | -3.308990 | C 1.129680  | -3.640190 | 1.643010  | C -1.581700 | 2.600670  | 2.459340  | C 0.232450  | -1.031400 | -4.471000 |
| C 0.158970  | -1.645970 | -2.295210 | C -0.333590 | -1.762920 | -4.180950 | C -0.168400 | -4.159760 | 1.548840  | C -0.247790 | 3.033860  | 2.459780  | C -0.489330 | -0.695170 | -5.790810 |
| C 0.932610  | -0.506380 | -2.876300 | C -1.246750 | -0.625460 | -4.100190 | C -1.251870 | -3.565060 | 2.327660  | C 0.753070  | 2.316210  | 3.243610  | H 1.197570  | -1.531300 | -4.683700 |
| C 2.710240  | 0.748490  | -1.557660 | C 0.728580  | 1.756190  | -3.644160 | C -3.355420 | -2.511120 | 1.521160  | C 2.809080  | 1.173750  | 2.459690  | H -0.366190 | -1.750680 | -3.880020 |
| C 2.178490  | -0.442350 | -2.054950 | C -0.454520 | 0.575750  | -4.348520 | C -2.447600 | -3.586660 | 1.488270  | C 1.984640  | 2.308880  | 2.459550  | N 2.458280  | 0.127560  | -2.179850 |
| C 1.018000  | 3.563480  | 1.571630  | C -0.663500 | 2.345160  | 0.816710  | C -2.532110 | 1.797920  | 0.606860  | C 1.747590  | -3.032370 | 1.215710  | N 3.622100  | 0.304290  | -2.099210 |
| C 1.924570  | 2.879320  | 2.441910  | C 0.623300  | 2.925340  | 0.559990  | C -3.122830 | 1.474230  | -0.659810 | C 2.410750  | -2.667200 | -0.000000 | H 0.890540  | 0.020250  | -6.396090 |
| C 3.005700  | 2.065830  | 1.838360  | C 0.964640  | 3.311150  | -0.826160 | C -3.910830 | 0.228280  | -0.781760 | C 3.280560  | -1.468290 | -0.000000 | H -1.479910 | -0.239430 | -5.603420 |
| C 3.093170  | 1.992800  | 0.408570  | C -0.006770 | 0.006880  | -1.855650 | C -4.054760 | -0.605280 | 0.373490  | C 3.423070  | -0.725480 | 1.215560  | H -0.648370 | -1.601480 | -6.401670 |
| C -2.844420 | 2.154470  | -1.559310 | C -0.704330 | -1.610790 | 1.961230  | C 1.581930  | 1.695860  | 0.798190  | C -2.344200 | -2.599200 | 1.215470  |             |           |           |
| C -2.223170 | 2.199940  | 2.850330  | C 0.341920  | -0.812690 | 2.519880  | C 1.072880  | 2.249220  | -0.481380 | C -1.792250 | -3.116990 | 0.000000  |             |           |           |
| C -0.955940 | 2.953240  | 0.000340  | C 0.265680  | 0.673440  | 2.412230  | C -0.422300 | 2.600910  | -0.936660 | C -0.383480 | -3.574130 | 0.000000  |             |           |           |
| C -0.405120 | 3.603380  | 1.847990  | C -0.852160 | 1.269800  | 1.751490  | C -1.227850 | 2.394540  | 0.724170  | C 0.367750  | -3.479740 | 1.215530  |             |           |           |
| C -2.812050 | -1.518850 | -0.289820 | C 0.352950  | -3.838910 | -1.353480 | C 2.701710  | -2.275920 | 0.556350  | C -3.195990 | 1.426400  | 1.215540  |             |           |           |
| C -3.082900 | -1.554540 | 1.117860  | C 1.333210  | -3.803640 | -0.311010 | C 0.302150  | -1.486640 | -0.594110 | C -3.516590 | 0.741180  | 0.000000  |             |           |           |
| C -3.394390 | -0.283360 | 1.811450  | C 0.943270  | -3.258620 | 1.007350  | C 2.898790  | -0.015730 | -0.497650 | C -3.516790 | -0.740160 | 0.000000  |             |           |           |
| C -3.420420 | 0.925760  | 1.046040  | C -0.398230 | -2.783500 | 1.188980  | C 2.464470  | 0.561140  | 0.741690  | C -3.196440 | -1.425600 | 1.215530  |             |           |           |
| C 1.025230  | -2.380230 | -1.392700 | C 1.004090  | -1.264930 | -4.487640 | C -0.695150 | -4.563250 | 0.248840  | C 0.368580  | 3.479740  | 1.215590  |             |           |           |
| C 0.516300  | -3.193380 | -0.329750 | C 2.178910  | -1.914110 | -3.986450 | C 0.113190  | -4.522490 | -0.933340 | C -0.382510 | 3.574060  | 0.000000  |             |           |           |
| C -0.931780 | -3.161060 | -0.062170 | C 2.016160  | -3.062840 | -3.065580 | C 1.484470  | -3.971980 | -0.836070 | C -1.791420 | 3.117380  | -0.000000 |             |           |           |
| C -1.749280 | -0.321090 | -0.875110 | C 0.688300  | -3.475330 | -2.714610 | C 1.944980  | -3.505110 | 0.439060  | C -2.343560 | 2.599920  | 1.215540  |             |           |           |
| C 3.394380  | 0.747190  | -0.267750 | C 0.374270  | 2.578150  | -3.153190 | C -3.952060 | -2.047620 | 0.279720  | C 3.423350  | 0.724580  | 1.215550  |             |           |           |
| C 3.617270  | -0.456860 | 0.476340  | C 1.740410  | 2.257470  | -3.450440 | C -3.696380 | -2.691090 | -0.975530 | C 3.280880  | 4.673750  | 0.000000  |             |           |           |
| C 3.022810  | -1.704590 | -0.032380 | C 2.027160  | 1.011830  | -4.198740 | C -2.738640 | 3.282010  | -1.010730 | C 2.411460  | 2.666620  | -0.000000 |             |           |           |
| C 2.262890  | -1.643020 | -1.245900 | C 0.929040  | 0.180000  | -4.591880 | C -2.106370 | 4.218100  | 0.211240  | C 1.748310  | 3.031800  | 1.215670  |             |           |           |
| C 3.497450  | 0.933580  | 2.564170  | C 2.337190  | 3.262810  | -1.228110 | C -3.947300 | -0.434520 | -2.049970 | C 3.423070  | -0.725480 | 1.215560  |             |           |           |
| C 3.009410  | 0.613120  | 3.902170  | C 3.396170  | 2.938840  | -0.278120 | C -3.312230 | 0.145390  | -3.228620 | C 2.808750  | -1.174560 | -2.459690 |             |           |           |
| C 1.979500  | 1.376960  | 4.469530  | C 3.067930  | 2.581550  | 1.038110  | C -2.574860 | 1.333410  | -3.111240 | C 1.984010  | -2.308680 | -2.459570 |             |           |           |
| C 1.404000  | 2.489560  | 3.718910  | C 1.666870  | 2.535720  | 1.447940  | C -2.445820 | 1.978790  | -1.807450 | C 1.747590  | -3.032370 | -1.215710 |             |           |           |
| C -0.019490 | 2.527720  | 3.995530  | C 1.494690  | 1.411120  | 2.349780  | C -1.103910 | 2.506560  | -1.699880 | C 0.367750  | -3.479740 | -1.215530 |             |           |           |
| C -0.325980 | 1.432150  | 4.913520  | C 2.794040  | 0.764660  | 2.500830  | C -0.403380 | 2.208990  | -2.941780 | C -0.248630 | -3.033680 | -2.459580 |             |           |           |
| C -1.524900 | 0.719130  | 4.771070  | C 2.866750  | -0.630880 | 2.603660  | C 0.956070  | 1.873730  | -2.905670 | C -1.582340 | -2.600160 | -2.459280 |             |           |           |
| C -2.457470 | 1.076120  | 3.704980  | C 1.640800  | -1.422050 | 2.555690  | C 1.656180  | 1.837410  | -1.626070 | C -2.344200 | -2.599200 | -1.215470 |             |           |           |
| C -3.036910 | -0.150670 | 3.192720  | C 1.934420  | -2.639330 | 1.821520  | C 2.593530  | 0.730720  | -1.671330 | C 3.196440  | -1.425600 | 1.215530  |             |           |           |
| C -2.466610 | -1.265840 | 3.943470  | C 3.334960  | -2.600350 | 1.412560  | C 2.472620  | 0.083370  | -2.974640 | C -2.963010 | -0.700860 | -2.459960 |             |           |           |
| C -2.179060 | -2.471870 | 3.287310  | C 3.708700  | -3.107780 | 0.159430  | C 2.581600  | -1.311760 | -3.069170 | C -2.962790 | 0.701590  | -2.459550 |             |           |           |
| C -2.447900 | -2.602610 | 1.858950  | C 2.669630  | -3.674480 | -0.726510 | C 2.810290  | -2.105730 | -1.867310 | C -3.195990 | 1.426400  | -1.215540 |             |           |           |
| C -1.384210 | -3.396250 | 1.275710  | C 3.035710  | -3.308000 | -2.089650 | C 2.051030  | -3.336750 | -1.987710 | C -2.343560 | 2.599920  | -1.215540 |             |           |           |
| C -0.453620 | -3.757140 | 2.340100  | C 4.257630  | -2.511420 | -2.045870 | C 1.345610  | -3.301820 | -3.264880 | C -1.581700 | 2.600670  | -2.459340 |             |           |           |
| C 0.925920  | -3.795830 | 2.008930  | C 4.414840  | -1.427110 | -2.921910 | C 0.048220  | -3.827050 | -3.358670 | C -0.247790 | 3.033860  | -2.459780 |             |           |           |
| C 1.416500  | -3.469110 | 0.747750  | C 3.350570  | -1.098940 | -3.865030 | C -0.588150 | -4.398750 | -2.176510 | C 0.368580  | 3.479740  | -1.215590 |             |           |           |
| C 2.657670  | -2.730380 | 0.895510  | C 3.276280  | 0.346670  | -3.970830 | C -1.996620 | -4.051080 | -2.214620 | C 1.748310  | 3.031800  | -1.215670 |             |           |           |
| C 2.937390  | -2.598860 | 2.320040  | C 4.293670  | 0.914080  | -3.091720 | C -2.232070 | -3.263110 | -3.420110 | C 1.984640  | 2.308880  | -2.459550 |             |           |           |
| C 3.498160  | -1.407980 | 2.809560  | C 4.018640  | 2.090200  | -2.378640 | C -3.137580 | -2.192380 | -3.384900 | C 2.809080  | 1.173750  | -2.459690 |             |           |           |
| C 3.800880  | -0.314550 | 1.890300  | C 2.721440  | 2.741560  | -2.526730 | C -3.841020 | -1.078530 | -2.145770 | C 3.423350  | 0.724580  | -1.215550 |             |           |           |
| C 0.908980  | -0.677850 | 5.379120  | C 4.794000  | 0.792670  | 1.016920  | C 0.828550  | -0.435870 | -4.637070 | C 0.384700  | -1.184360 | -3.997390 |             |           |           |
| C 1.984790  | -1.476070 | 4.704940  | C 5.138890  | 1.165150  | -0.355510 | C -1.597990 | -0.802840 | -4.762210 | C 1.245600  | -0.000090 | -3.998450 |             |           |           |
| C 3.017260  | -0.838840 | 4.066510  | C 4.451500  | 2.221470  | -0.988950 | C -2.818130 | -0.941880 | -4.070400 | C 2.436740  | -0.000300 | -3.244700 |             |           |           |
| C -0.341470 | -1.422800 | 2.530900  | C 4.869890  | -0.666210 | 1.122300  | C 0.592720  | 0.085460  | -4.601300 | C -1.007530 | -0.732060 | -3.998020 |             |           |           |
| C 0.912760  | 0.724580  | 5.224250  | C 3.777680  | 1.491850  | 1.699940  | C -1.312150 | 1.484100  | -3.827210 | C 0.752500  | -2.316560 | -3.243750 |             |           |           |
| C -0.041390 | -2.680510 | 4.442520  | C 5.260790  | -1.194730 | -0.185850 | C 0.703140  | -1.372120 | -4.       |             |           |           |             |           |           |

|             |           |           |             |           |           |             |           |           |             |           |           |             |           |           |
|-------------|-----------|-----------|-------------|-----------|-----------|-------------|-----------|-----------|-------------|-----------|-----------|-------------|-----------|-----------|
| C -1.395270 | 2.747510  | 0.868110  | C -1.549595 | -2.807280 | -1.114782 | C -2.406190 | -0.671710 | -1.676360 | C -2.378922 | 0.167110  | -1.788546 | C -1.368203 | 2.903635  | 0.288973  |
| C -1.626730 | 1.812120  | 1.881600  | C -1.774801 | -1.624614 | -1.954795 | C -2.854360 | -0.313860 | -0.332720 | C -2.816368 | 0.318867  | -0.403289 | C -1.648233 | 2.186109  | 1.455922  |
| C -2.471740 | 0.623130  | 1.659510  | C -2.392146 | -0.493884 | -1.413083 | C -2.611600 | -1.307870 | 0.749970  | C -2.753698 | -0.895606 | 0.459677  | C -2.526140 | 0.998642  | 1.443414  |
| C -1.703850 | -1.760220 | 1.818860  | C -2.948058 | -0.481606 | -0.035355 | C -1.276840 | -1.200590 | 2.841850  | C -1.486542 | -1.396878 | 2.538718  | C -1.815009 | -1.329526 | 2.054086  |
| C -1.731280 | -0.474980 | 2.364830  | C -2.094876 | 1.015538  | 1.806249  | C -2.160620 | -0.595970 | 1.933690  | C -2.247409 | -0.506652 | 1.763755  | C -1.869486 | 0.034380  | 2.349466  |
| C 0.341170  | -3.005970 | -2.020090 | C 1.671850  | -0.662415 | 3.664083  | C -2.799810 | -2.727690 | 1.999410  | C 2.445678  | -3.300525 | 1.430120  | C 0.257799  | -3.320165 | -1.438142 |
| C 1.388270  | -3.420180 | -1.135430 | C 2.183070  | 0.652011  | 3.417196  | C 3.282690  | -1.485530 | 2.587250  | C 2.995901  | -2.269667 | 2.257881  | C 1.277730  | -3.586589 | -0.469224 |
| C 1.082530  | -3.561280 | 0.307450  | C 1.223932  | 1.742531  | 3.127081  | C 2.292490  | -0.722870 | 3.382770  | C 2.094018  | -1.547448 | 3.183753  | C 0.944198  | -3.447451 | 0.967183  |
| C -0.247350 | -3.273410 | 0.756930  | C -0.175052 | 1.434785  | 3.101560  | C 0.972060  | -1.261920 | 3.530940  | C 0.707993  | -1.911217 | 3.212399  | C -0.384023 | -3.048463 | 1.325780  |
| C 0.776460  | 0.736730  | -3.667160 | C 2.513872  | -3.470977 | 0.780277  | C 2.645480  | -2.767740 | -2.110360 | C 2.348103  | -2.493341 | -2.604097 | C 0.823181  | 0.037806  | -3.743108 |
| C 1.984440  | -0.029420 | -3.583670 | C 3.590837  | -2.574013 | 1.080915  | C 3.762400  | -2.046200 | -1.574730 | C 3.534454  | -2.058281 | -1.928475 | C 2.007880  | -0.728153 | -3.492938 |
| C 1.885800  | -1.476010 | -3.279220 | C 3.487001  | -1.724547 | 2.289984  | C 4.091140  | -2.213940 | -0.140780 | C 3.787860  | -2.550356 | -0.555511 | C 1.864403  | -2.088901 | -2.925546 |
| C 0.585690  | -2.047020 | -3.080420 | C 2.316327  | -1.836600 | 3.108444  | C 3.278540  | -3.088120 | 0.652040  | C 2.836332  | -3.438643 | 0.040563  | C 0.546946  | -2.581727 | -2.651855 |
| C 0.216920  | 3.501530  | -0.672230 | C 0.306240  | -2.540274 | -2.561955 | C -0.583420 | -0.465810 | -3.187910 | C -0.495318 | 0.409942  | 3.217000  | C 0.287914  | 3.323279  | -1.328235 |
| C 1.559730  | 3.407110  | -1.162020 | C 1.719092  | -2.346445 | -2.699018 | C 0.693480  | 0.091140  | -3.529670 | C 0.856689  | 0.836424  | -3.432163 | C 1.635703  | 3.109844  | -1.764496 |
| C 1.803880  | 2.658730  | -2.417290 | C 2.615078  | -2.915753 | -1.666723 | C 1.888830  | -0.777620 | -3.441650 | C 1.917350  | -0.192696 | -3.513517 | C 1.880584  | 2.331297  | -2.851727 |
| C 0.688070  | 2.065520  | -3.090950 | C 2.032198  | -3.638929 | -0.577305 | C 1.719030  | -2.139980 | -3.032400 | C 1.548667  | -1.570325 | -3.384790 | C 0.761148  | 1.451368  | -3.427301 |
| C -0.554990 | 1.475360  | 2.805110  | C -1.883270 | 0.824771  | -1.748122 | C -2.352010 | 0.281670  | 0.208490  | C -2.157774 | 1.391682  | 0.390273  | C -0.597903 | 2.002406  | 2.446503  |
| C 0.712190  | 2.144930  | -2.772720 | C -0.829011 | 1.012820  | -2.701825 | C -1.693700 | 1.966280  | -0.590360 | C -1.344421 | 2.412275  | -0.191454 | C 0.685564  | 2.623482  | 2.317626  |
| C 0.959170  | 3.127590  | 1.697510  | C -0.178106 | -0.182235 | -3.273466 | C -1.281310 | 1.600620  | -1.970270 | C -0.943017 | 2.271534  | -1.614388 | C 0.978148  | 3.380632  | 1.084156  |
| C -0.082280 | 3.366330  | 0.741578  | C -0.631448 | -1.471014 | -2.844799 | C -1.556590 | 0.276070  | -2.424470 | C -1.386267 | 1.117639  | -2.329849 | C -0.038538 | 3.458687  | 0.078383  |
| C -0.486800 | -2.542720 | 1.988070  | C -1.051657 | 1.992478  | 2.089909  | C -0.198650 | -0.413280 | 3.434720  | C -0.330646 | -0.903129 | 3.280668  | C -0.624363 | -2.996039 | 2.393170  |
| C 0.602910  | -2.078100 | 2.795350  | C -0.547425 | 2.870942  | 1.077917  | C -0.080360 | 0.993200  | 3.192670  | C -0.801052 | 0.491062  | 3.326514  | C 0.462647  | -1.515317 | 3.124245  |
| C 0.516160  | -0.723530 | 3.377490  | C -1.032665 | 2.695682  | -0.304748 | C -1.021200 | 1.631770  | 2.244490  | C -0.820708 | 1.430449  | 2.520874  | C 0.402113  | -0.074283 | 3.441121  |
| C -0.651320 | 0.061900  | 3.102890  | C -1.983386 | 1.654239  | -0.564231 | C -2.008190 | 0.814050  | 1.597760  | C -1.889046 | 0.904487  | 1.702321  | C -0.738097 | 0.672173  | 2.998639  |
| C 2.133600  | -3.345300 | 1.255520  | C 1.648811  | 2.827298  | 2.294197  | C 2.404400  | 0.703930  | 3.431300  | C 2.399782  | -0.188966 | 3.516638  | C 1.984021  | -3.080440 | 1.880398  |
| C 3.501860  | -3.078000 | 0.827190  | C 3.018900  | 2.917476  | 1.801227  | C 3.514250  | 1.403710  | 2.799050  | C 3.616526  | 0.457565  | 3.038265  | C 3.365163  | -2.924743 | 1.439704  |
| C 3.791040  | -2.932480 | -0.539018 | C 3.926120  | 1.882621  | 2.071936  | C 4.453580  | 0.680820  | 2.040240  | C 4.472490  | -0.227484 | 2.163479  | C 3.681859  | -3.052466 | 0.079111  |
| C 2.721240  | -3.065660 | -0.528610 | C 3.494821  | 0.723558  | 2.846442  | C 3.411090  | -0.764090 | 1.899340  | C 4.137395  | -1.580319 | 1.735334  | C 2.626040  | -3.341200 | -0.886509 |
| C 2.967300  | -2.104930 | -2.583270 | C 4.138365  | -0.450119 | 2.289734  | C 4.711880  | -1.124300 | 0.552060  | C 4.529106  | -1.719454 | 0.345431  | C 2.915080  | -2.600740 | -2.099368 |
| C 4.189280  | -1.376290 | -2.251820 | C 4.968286  | -0.017067 | 1.169374  | C 5.102790  | 0.098180  | -0.141880 | C 5.106815  | -0.452239 | -0.087615 | C 4.149435  | -1.822444 | -1.883121 |
| C 4.283380  | -0.006960 | -2.540500 | C 5.066472  | -0.821301 | 0.024548  | C 4.788390  | -2.576900 | -1.500080 | C 4.862458  | 0.015617  | -1.387236 | C 4.285115  | -0.566468 | -2.419584 |
| C 3.156850  | 0.679420  | -3.167570 | C 4.337468  | -2.085184 | -0.037848 | C 4.078590  | -0.801530 | -2.209520 | C 4.038575  | -0.770272 | -2.298154 | C 3.191112  | 0.018174  | -3.190727 |
| C 3.067150  | 2.006690  | -2.590750 | C 3.855025  | -2.252811 | -1.394829 | C 3.150660  | -0.173800 | -3.133110 | C 3.237897  | 0.152436  | -3.081500 | C 3.127942  | 1.431568  | -2.873171 |
| C 4.138540  | -2.146390 | -1.609178 | C 4.286517  | -1.095940 | -2.172006 | C 3.288900  | 1.272990  | -2.997320 | C 3.569716  | 1.508392  | -2.658695 | C 4.138369  | 1.737399  | -1.910208 |
| C 3.907550  | -2.855520 | -0.422478 | C 3.439582  | -0.560352 | -3.152747 | C 2.153990  | 2.094220  | -3.084370 | C 2.563397  | 2.482097  | -2.586633 | C 3.952487  | -2.649632 | -0.882122 |
| C 2.599510  | 3.454160  | -1.078040 | C 2.311842  | -1.161151 | -3.387863 | C 0.842970  | 1.494550  | -3.313520 | C 1.191257  | 2.133337  | -2.938318 | C 2.658181  | 3.314108  | -0.782857 |
| C 3.201390  | 3.313970  | 1.235750  | C 1.194220  | -0.091044 | -3.671771 | C -0.131530 | 2.238700  | -2.535360 | C 0.303572  | 2.838035  | -2.031731 | C 2.332377  | 3.447615  | 0.625263  |
| C 3.426110  | 2.629350  | 1.866270  | C 1.921056  | 1.171518  | -3.610125 | C 0.575160  | 2.399830  | -1.827820 | C 1.128636  | 3.625544  | -1.623031 | C 3.425677  | 2.866399  | 1.395998  |
| C 3.190040  | 1.698770  | 2.889780  | C 1.299800  | 2.309028  | -3.072282 | C 0.191770  | 3.644870  | -0.524580 | C 0.749587  | 3.760220  | -0.220850 | C 3.147377  | -2.150925 | 2.570295  |
| C 1.829220  | 1.422450  | 3.315530  | C -0.067455 | 2.218328  | -2.574853 | C -0.917120 | 2.942770  | 0.113820  | C -0.465219 | 3.109670  | 0.698634  | C 1.766402  | -1.989770 | 3.009231  |
| C 1.725910  | 0.004940  | 3.615430  | C -0.168170 | 3.050180  | -1.389488 | C -0.592040 | 2.784400  | 1.519500  | C -0.212285 | 2.630295  | 2.044290  | C 1.626359  | 0.656381  | 3.565243  |
| C 0.033410  | -0.595650 | 3.375820  | C 1.136596  | 3.655546  | -1.153723 | C 0.719340  | 3.383820  | 1.749420  | C 1.159254  | 2.980933  | 2.397801  | C 2.920642  | -0.000349 | 3.469429  |
| C 3.116790  | -1.881220 | 2.817750  | C 1.599967  | 3.818652  | 0.160826  | C 1.614910  | 2.777910  | 2.643140  | C 1.931755  | 2.089334  | 3.156653  | C 2.978555  | -1.376396 | 3.162718  |
| C 1.896210  | -2.607910 | 2.484070  | C 0.773338  | 3.383728  | 1.280782  | C 1.230300  | 1.553400  | 3.337130  | C 1.358845  | 0.818998  | 3.586800  | C 1.745570  | -2.124074 | 2.945240  |
| C 5.311070  | -1.021530 | -0.058300 | C 4.823534  | 2.028824  | -0.240403 | C 4.493170  | 2.469040  | 0.310100  | C 4.819426  | 1.843151  | 0.826494  | C 5.244024  | -1.120829 | 0.228283  |
| C 5.006880  | -1.163690 | 1.367440  | C 3.883878  | 3.107400  | -0.523473 | C 3.510690  | 3.222380  | 1.093570  | C 3.920694  | 2.558453  | 1.739718  | C 4.912522  | -0.987506 | 1.648305  |
| C 4.122820  | -2.172860 | 1.798830  | C 2.998507  | 3.544608  | 0.482391  | C 3.035440  | 2.698160  | 3.212640  | C 3.337712  | 1.875444  | 2.825783  | C 3.994013  | -1.876991 | 2.240396  |
| C 5.410750  | 0.406960  | -0.359490 | C 4.932950  | 1.190266  | -1.434030 | C 4.165660  | 2.636560  | -1.108330 | C 4.560889  | 2.331530  | -0.530724 | C 5.385782  | -0.222935 | -0.331612 |
| C 4.713490  | -1.894980 | -0.991300 | C 4.851562  | 1.431737  | 1.036905  | C 4.955760  | 1.222700  | 0.779200  | C 5.084725  | 0.476516  | 1.039224  | C 4.638414  | -2.138925 | -0.537778 |
| C 5.167610  | 1.149520  | 0.880360  | C 4.047720  | 1.749527  | -2.456958 | C 2.977920  | 4.921200  | -1.200740 | C 3.510068  | 3.347557  | -0.455882 | C 5.141691  | -1.288493 | 0.742123  |
| C 4.906500  | 0.902060  | -1.581170 | C 5.058075  | -0.208557 | -1.300282 | C 4.314910  | 1.549490  | -1.994000 | C 4.587357  | 1.431773  | -1.614572 | C 4.915516  | 0.491607  | -1.633816 |
| C 4.919210  | 0.177850  | 1.948410  | C 3.399826  | 2.936042  | -1.894640 | C 2.755510  | 3.853620  | 1.602620  | C 3.114226  | 3.487614  | 0.946922  | C 4.850961  | 0.440708  | 1.966759  |
| C 4.433700  | 2.352610  | 0.844450  | C 3.320026  | 0.887577  | -3.301671 | C 1.996290  | 2.243770  | -2.174930 | C 2.532902  | 3.420887  | -1.469111 | C 4.441604  | 2.379721  | 0.466990  |
| C 3.952210  | 0.452530  | 2.935240  | C 2.051918  | 3.208812  | -2.201048 | C 1.206410  | 3.932070  | 0.486560  | C 1.758981  | 3.694750  | 1.274872  | C 3.873655  | 0.917136  | 2.862523  |
| N -4.291810 | 0.981720  | 2.864950  | N -5.201755 | -0.463630 | -0.239022 | N -4.255720 | -0.570910 | -2.787640 | N -4.186793 | 0.578901  | -2.870722 | N -4.327492 | 1.506312  | 2.557416  |
| N -5.105300 | 0.841590  | 2.005070  | N -5.326489 | -1.583825 | 0.562835  | N -5.018970 | -0.305380 | -1.906270 | N -4.938206 | 0.788144  | -1.964926 | N -4.506426 | 1.228885  | 1.739704  |
| C -5.542050 | 0.594590  | 0.648910  | N -4.666811 | -2.381269 | 1.164309  | N -5.057810 | -0.159120 | -0.525380 | N -4.954747 | 0.886788  | -0.580352 | C -5.275848 | 0.805382  | 0.425707  |
| C -2.824580 | -0.969090 | -0.260780 | C -5.465033 | -0.766767 | -1.717598 | N -5.073760 | -1.876180 | -2.864190 | C -5.742893 | -0.161871 | 0.127044  | C -5.816733 | -0.914486 | -0.158623 |
| C -5.849740 | -0.723170 | 1.280000  | H -4.985342 | 0.304455  | -2.309564 | C -5.620060 | -1.416200 | -0.155720 | C -6.198029 | -1.322948 | -0.547034 | C -5.616322 | -0.562188 | 0.254180  |

|             |           |           |             |           |           |             |           |           |             |           |           |             |           |           |
|-------------|-----------|-----------|-------------|-----------|-----------|-------------|-----------|-----------|-------------|-----------|-----------|-------------|-----------|-----------|
| C -1.178152 | 2.043964  | 1.944366  | C -0.112743 | -0.351560 | 3.489047  | C -1.390040 | 1.484130  | -2.150540 | C -1.948000 | 0.063000  | 0.591000  | C -1.952290 | 0.217770  | 0.553910  |
| C -0.624625 | 2.897409  | 0.937103  | C -0.060093 | 1.048604  | 3.197951  | C -0.365940 | -1.156770 | 3.208090  | C -1.794000 | -0.619000 | -0.660000 | C -1.817720 | -0.416820 | -0.722110 |
| C -1.043556 | 2.686842  | -0.461530 | C -1.055575 | 1.614418  | 2.261038  | C 0.036750  | 0.205970  | 3.386650  | C -0.876000 | -1.770000 | -0.717000 | C -0.937250 | -1.592710 | -0.817190 |
| C -1.983460 | 1.640339  | -0.739250 | C -2.026384 | 0.735052  | 1.674761  | C -0.729830 | 1.268050  | 2.696500  | C -0.189000 | -2.145000 | -0.695000 | C -0.274400 | -2.039380 | -0.374880 |
| C 1.511245  | 2.880851  | 2.256871  | C 2.439273  | 0.868199  | 3.363556  | C -1.838870 | 0.888740  | 1.868040  | C -2.040000 | 1.617000  | -1.778000 | C 1.978630  | 1.868280  | -1.751990 |
| C 2.903216  | 2.956246  | 1.826996  | C 3.497403  | 1.589207  | 2.664836  | C 2.406380  | -0.627520 | 3.455120  | C -1.455000 | 2.144000  | -3.007000 | C -1.364340 | 2.422230  | -2.954650 |
| C 3.793215  | 1.926729  | 2.165811  | C 4.441518  | 0.880542  | 1.907344  | C 3.652090  | -0.005670 | 3.017320  | C -0.679000 | 3.312000  | -2.964000 | C -0.549210 | 3.559290  | -2.860290 |
| C 3.322650  | 0.788296  | 2.947822  | C 4.356082  | -0.572164 | 1.819690  | C 4.453460  | -0.646590 | 2.060560  | C -0.464000 | 3.994000  | -1.691000 | C -0.320010 | 4.182380  | -1.558900 |
| C 3.988922  | -0.400026 | 2.452251  | C 4.727318  | -0.961092 | 0.472055  | C 4.030450  | -1.927760 | 1.504530  | C 0.893000  | 4.505000  | -1.679000 | C 1.054580  | 4.643210  | -1.518750 |
| C 4.871501  | 0.803532  | 1.361388  | C 5.042695  | 0.250986  | -0.274194 | C 4.391390  | -1.945680 | 0.099640  | C 1.521000  | 4.134000  | -2.946000 | C 1.678230  | 4.302520  | -2.795080 |
| C 5.021193  | -0.828861 | 0.242824  | C 4.676772  | 0.350933  | -1.624619 | C 5.038690  | -0.677280 | -0.215780 | C 2.872000  | 3.760000  | -2.969000 | C 3.815690  | 3.882690  | -2.825710 |
| C 4.292565  | -2.092933 | 0.177524  | C 3.990567  | -0.758921 | -2.275046 | C 4.803270  | -0.065780 | -1.456860 | C 3.641000  | 3.743000  | -1.726000 | C 3.774440  | 3.789850  | -1.580220 |
| C 3.874886  | -2.293981 | -1.196357 | C 3.008929  | -0.201189 | -3.186773 | C 3.918320  | -0.705950 | -2.424680 | C 4.538000  | 2.604000  | -1.776000 | C 4.632700  | 2.623310  | -1.669680 |
| C 4.345615  | -1.157194 | -1.980705 | C 3.091498  | 1.252839  | -3.104188 | C 3.162410  | 0.336130  | -3.094820 | C 4.328000  | 1.921000  | -3.049000 | C 4.408730  | 1.998590  | -2.970500 |
| C 3.547459  | -0.644515 | -3.013321 | C 1.921391  | 2.023056  | -3.180029 | C 3.581510  | 1.621890  | -2.545360 | C 4.391000  | 0.521000  | -3.106000 | C 4.423010  | 0.601120  | -3.084030 |
| C 2.250605  | -1.248655 | -3.294765 | C 0.630057  | 1.365558  | -3.345780 | C 2.634300  | 2.639370  | -2.353780 | C 4.660000  | -0.243000 | -1.892000 | C 4.655730  | -0.219610 | -1.899830 |
| C 1.330679  | -0.184415 | -3.649485 | C -0.348360 | 2.094519  | -2.559350 | C 1.237390  | 2.405370  | -2.707540 | C 3.860000  | -1.452000 | -1.941000 | C 3.814370  | -1.396050 | -2.001160 |
| C 2.057230  | 1.077997  | -3.584979 | C 0.339611  | 1.204866  | -1.910211 | C 4.007620  | 3.063090  | -1.714880 | C 3.094000  | -1.437000 | -3.183000 | C 3.059290  | -1.305060 | -3.245480 |
| C 1.414268  | 2.253954  | -3.105644 | C -0.018846 | 3.579181  | -0.608784 | C 1.292060  | 3.708420  | -0.749740 | C 1.780000  | -1.931000 | -3.200000 | C 1.729130  | -1.751880 | -3.286810 |
| C 0.024721  | 2.129409  | -2.671582 | C -1.076181 | 2.854420  | 0.089487  | C 0.943500  | 3.724710  | 0.608260  | C 1.190000  | -2.453000 | -1.973000 | C 1.111660  | -2.298560 | -2.086810 |
| C -0.129165 | 3.014348  | -1.513049 | C -0.698017 | 2.765636  | 1.485846  | C -0.300250 | 3.098470  | 1.044090  | C -0.210000 | -2.064000 | -1.949000 | C -0.273280 | -1.862340 | -2.055690 |
| C 1.164531  | 3.623294  | -1.230752 | C 0.592443  | 1.431625  | 1.652530  | C -0.057600 | 2.474100  | 2.331100  | C -0.485000 | -1.302000 | -3.161000 | C -0.517320 | -1.045670 | -3.239070 |
| C 1.565989  | 3.818773  | 0.099896  | C 1.540054  | 2.880288  | 2.536669  | C 1.338840  | 2.708000  | 2.687600  | C -1.355000 | -0.202000 | -3.107000 | C -1.345870 | 0.081030  | -3.147330 |
| C 0.686093  | 3.413967  | 1.190803  | C 1.229559  | 1.664891  | 3.280958  | C 2.068160  | 1.700000  | 3.354420  | C -1.979000 | 0.169000  | -1.842000 | C -1.968260 | 0.422550  | -1.872830 |
| C 4.808266  | 1.931830  | -0.103924 | C 4.349656  | 2.608580  | 0.110448  | C 1.427330  | -0.427120 | 3.649120  | C 0.958000  | 2.321000  | -4.556000 | C 1.065090  | 2.576570  | -4.481120 |
| C 3.877466  | 3.086566  | -0.458268 | C 3.364018  | 3.348671  | 0.910281  | C 4.897880  | 1.527540  | 0.931270  | C 0.149000  | 1.102000  | -4.600000 | C 0.213840  | 1.389270  | -4.577900 |
| C 2.946950  | 3.590011  | -0.493523 | C 2.951439  | 2.846935  | 2.161481  | C 4.061270  | 2.195990  | 1.931020  | C -1.037000 | 1.020000  | -3.842000 | C -0.979540 | 1.318640  | -3.831440 |
| C 4.963334  | 1.145887  | -1.270771 | C 3.969587  | 2.713367  | -1.290785 | C 3.453850  | 1.440550  | 2.953860  | C 2.368000  | 1.930000  | -4.582000 | C 2.460250  | 2.138990  | -4.513400 |
| C 4.765174  | 1.448745  | 1.187325  | C 4.878223  | 1.398893  | 0.613754  | C 4.652000  | 2.165550  | -0.364430 | C 0.547000  | 3.406000  | -3.754000 | C 0.685170  | 3.642630  | -3.677710 |
| C 4.129080  | 1.681275  | -3.247943 | C 2.748739  | 3.516910  | -1.371006 | C 5.098010  | 0.132570  | 0.999980  | C 2.432000  | 0.468000  | -4.641000 | C 2.473850  | 0.678000  | -4.630600 |
| C 5.069006  | -0.294959 | -1.096047 | C 4.134623  | 1.603631  | -2.144275 | C 3.664440  | 3.228840  | -0.165880 | C 3.305000  | 2.640000  | -3.801000 | C 3.416160  | 2.783010  | -3.699490 |
| C 3.458449  | 2.882476  | -1.846535 | C 2.374174  | 3.908501  | -0.010945 | C 4.609250  | 1.380740  | -1.534260 | C 1.059000  | -0.046000 | -4.656000 | C 1.084060  | 0.213330  | -4.674130 |
| C 3.439380  | 0.799595  | -3.204234 | C 1.746218  | 3.176176  | -2.301921 | C 3.299660  | 3.246900  | 1.253000  | C 3.428000  | -0.220000 | -3.918000 | C 3.440990  | -0.072770 | -3.930730 |
| C 2.126869  | 3.149184  | -2.222407 | C 1.014243  | 3.942630  | 0.358414  | C 2.677180  | 3.460320  | -1.146270 | C 0.744000  | -1.224000 | -3.950000 | C 0.723080  | -0.979550 | -4.016490 |
| C -5.226117 | -0.428948 | -0.443604 | N -4.310165 | -0.901144 | -2.592431 | C 1.963210  | 3.495720  | 1.628860  | N 0.390000  | -2.896000 | 3.696000  | C 0.277120  | -2.930440 | 3.733050  |
| N -5.392501 | -1.501186 | 0.415555  | N -5.081350 | -0.584940 | -1.723831 | N -4.212060 | 1.088540  | -2.684480 | N 0.482000  | -2.534000 | 4.893000  | N 0.485870  | -2.251050 | 5.069710  |
| C 4.743960  | -2.291460 | 1.041139  | C 5.095935  | -0.323947 | -0.368059 | N -4.957523 | 2.215440  | -1.768760 | C 0.926000  | -1.110000 | 1.549000  | N 0.888560  | -1.062510 | 5.042390  |
| C -5.586933 | -0.773088 | 1.916286  | C -0.792152 | -2.046821 | -2.729159 | C -4.974830 | 1.174040  | -0.379090 | C 0.197000  | 0.771000  | 3.405000  | C 1.308860  | -0.096070 | 3.691010  |
| H -4.938253 | -0.114764 | -2.529214 | C -5.759251 | -1.474506 | 0.443370  | C -5.714590 | 0.021620  | -2.018650 | C -0.148000 | -0.397000 | 5.978000  | H 1.261190  | -0.563470 | 2.688440  |
| C -5.276366 | -2.240538 | -2.284069 | H -5.270576 | -1.438993 | 1.437702  | C -6.272440 | -1.000870 | -0.588840 | H -1.486000 | -0.853000 | 5.960000  | H 2.322110  | -3.657570 | 3.775310  |
| H -4.238475 | -2.525274 | -2.056909 | C -5.509550 | -2.868613 | -0.173251 | H -6.263310 | -0.914740 | -1.678940 | H -1.746000 | -1.746000 | 5.384000  | C 1.123460  | -5.173480 | 4.783490  |
| H -5.953072 | -2.929305 | -1.749180 | H -5.850669 | -3.646550 | 0.530208  | H -6.896340 | -2.114160 | -0.002380 | C -2.484000 | -0.175000 | 6.683000  | H 1.157080  | -4.690570 | 5.777290  |
| H -5.436066 | -2.387143 | -3.365790 | H -6.081186 | -2.988192 | -1.109770 | H -7.325360 | -2.890910 | -0.642730 | H -3.513000 | -0.546000 | 6.660000  | H 1.019620  | -5.629220 | 4.689510  |
| C -2.609590 | 0.863146  | 0.313852  | H -4.447741 | -3.055775 | -0.390450 | H -6.974470 | -2.231110 | 1.398780  | C -2.162000 | 0.972000  | 7.432000  | C -0.535830 | -1.461910 | 1.673460  |
| C -5.634716 | 0.896820  | 0.106725  | C -5.419789 | 1.086227  | 0.003534  | H -7.458970 | -3.100190 | 1.853550  | H -2.938000 | 1.500000  | 7.993000  | C -1.175150 | -3.431500 | 3.641910  |
| C -6.102574 | 1.037322  | 1.436803  | C -5.489380 | 1.451934  | 1.371783  | H -6.424450 | -1.220700 | 2.210070  | C -0.833000 | 1.435000  | 7.454000  | C -2.163440 | -2.904370 | 4.513090  |
| H -6.229255 | 0.150307  | 0.263608  | H -5.329933 | 0.699392  | 2.148518  | H -6.475570 | -1.302180 | 3.300090  | H -0.570000 | 2.326000  | 8.032000  | H -1.883530 | -2.192630 | 5.293970  |
| C -6.428544 | 2.303603  | 1.949605  | C -5.738725 | 2.783779  | 1.741829  | C -5.801730 | -0.102700 | 1.629540  | C 0.168000  | 0.753000  | 6.737000  | C -3.502860 | -3.322880 | 4.398980  |
| H -6.794836 | 2.389881  | 2.975789  | H -5.785438 | 0.047535  | 2.802605  | H -5.365880 | 0.663700  | 2.277020  | H 1.195000  | 1.128000  | 6.771000  | H -4.253970 | -2.919260 | 5.085120  |
| C -6.292542 | 3.451497  | 1.147719  | C -5.924471 | 3.773145  | 0.758702  | H -5.140210 | 2.581510  | 0.259380  | C 2.295000  | -1.234000 | 5.884000  | C -3.874300 | -4.254660 | 3.412610  |
| H -6.548277 | 4.436445  | 1.547741  | H -6.123075 | 4.807798  | 1.049986  | H -4.597780 | 2.522450  | 1.224760  | H 2.995000  | -1.768000 | 5.213000  | H -4.915640 | -4.578890 | 3.323690  |
| C -5.825246 | 3.323590  | -0.173565 | C -5.854005 | 3.420022  | -0.602083 | C -4.501220 | 3.703340  | -0.589540 | C 2.716000  | -0.218000 | 6.015000  | C -2.895520 | -4.767380 | 2.539970  |
| H -5.709724 | 4.210044  | -0.803172 | H -6.000305 | 4.179848  | -1.374607 | H -3.465620 | 4.477000  | -0.888220 | C 2.240000  | -1.961000 | 7.247000  | H -3.172150 | -5.491500 | 1.762770  |
| C -5.500753 | 2.059978  | -0.693732 | C -5.603362 | 2.090651  | -0.978313 | H -5.093270 | 3.887150  | -1.504680 | H 1.560000  | -1.419000 | 7.931000  | C -1.556700 | -4.352990 | 2.655280  |
| H -5.122572 | 1.982166  | -1.716038 | H -5.569203 | 1.825553  | -2.039034 | H -4.484370 | 4.608770  | -0.007300 | H 1.803000  | -2.966000 | 7.101000  | H -0.811400 | -4.758640 | 1.963880  |
| C -7.071624 | -0.454008 | -2.238803 | H -7.284887 | -1.251852 | 0.623392  | C -6.628890 | 2.922250  | 0.539860  | C 3.642000  | -2.072000 | 7.882000  | C 2.060970  | -6.266090 | 4.684190  |
| H -7.738910 | -1.103111 | -1.645325 | H -7.791925 | -1.277548 | -0.356534 | H -7.195950 | 2.796030  | -0.407380 | H 4.330000  | -2.651000 | 7.238000  | H 2.061880  | -7.039560 | 5.485810  |
| H -7.331619 | 0.593615  | -2.026064 | H -7.703729 | -2.060611 | 1.247209  | H -7.112830 | 3.171770  | 1.191660  | H 4.090000  | -1.073000 | 8.037000  | H 2.181800  | -6.768170 | 3.698520  |
| H -7.264993 | -0.652442 | -3.087811 | H -7.514372 | -0.288399 | 1.104432  | H -6.697320 | 3.910220  | 1.029800  | H 3.594000  | -2.577000 | 8.863000  | H 2.318940  | -5.840560 | 4.818160  |

| [c-c]-Pz-PCPr-1<br>-3164.592447 |  |  | [c-c]-Pz-PCPr-2<br>-3164.592447 |  |  | [a-b]-Pz-PCPr-2<br>-3164.591277 |  |  | [a-b]-Pz-PCPr-2 |
|---------------------------------|--|--|---------------------------------|--|--|---------------------------------|--|--|-----------------|
|---------------------------------|--|--|---------------------------------|--|--|---------------------------------|--|--|-----------------|

|                                  |                                              |                                              |                                              |                                              |
|----------------------------------|----------------------------------------------|----------------------------------------------|----------------------------------------------|----------------------------------------------|
| C -2.034370 -1.545440 -2.846320  | C -2.034370 -1.545440 -2.846320              | C -0.492010 -1.302390 -3.157040              | C -0.470880 -1.043240 -3.272070              | C -2.044990 -1.581700 -2.794350              |
| C -2.923640 -0.460940 -2.823280  | C -2.923640 -0.460940 -2.823280              | C -1.363980 -0.203540 -3.098330              | C -1.323300 -0.067740 -3.170850              | C -2.936790 -0.499060 -2.776140              |
| C -3.520050 -0.036310 -1.561080  | C -3.520050 -0.036310 -1.561080              | C -1.980470 -0.160800 -1.829630              | C -1.950060 -0.388060 -1.893290              | C -3.526220 -0.063400 -1.514450              |
| C -0.703450 -2.023990 -4.467450  | C -0.703450 -2.023990 -4.467450              | C -0.931360 -2.321800 -4.571400              | C -1.040320 -2.616940 -4.486350              | C -0.732900 -1.974480 -4.458770              |
| C -1.491670 -0.789350 -4.427570  | C -1.491670 -0.789350 -4.427570              | C -0.124250 -1.100580 -4.605940              | C -0.210660 -1.415230 -4.592600              | C -1.518100 -0.738590 -4.401840              |
| C -2.651860 -0.725700 -3.629930  | C -2.651860 -0.725700 -3.629930              | C -1.055260 -1.016720 -3.839140              | C -0.980520 -1.317130 -3.845640              | C -2.672950 -0.680250 -3.595990              |
| C -0.713910 -1.656770 -4.515550  | C -0.713910 -1.656770 -4.515550              | C -2.341500 -1.934780 -4.606490              | C -2.442940 -2.203780 -4.523250              | C -0.684690 -1.609940 -4.512530              |
| C -1.112190 -3.139080 -3.709190  | C -1.112190 -3.139080 -3.709190              | C -0.522460 -3.407600 -3.768130              | C -0.642050 -3.668880 -3.633850              | C -1.139230 -3.095910 -3.708540              |
| C -0.802720 -0.194970 -4.503330  | C -0.802720 -0.194970 -4.503330              | C -2.408910 -0.472640 -4.662090              | C -2.482880 -0.745150 -4.652390              | C -0.777260 -1.048580 -4.487020              |
| C -1.659780 -2.421970 -3.802880  | C -1.659780 -2.421970 -3.802880              | C -3.282770 -2.648890 -3.834200              | C -3.387730 -2.859260 -3.704770              | C -1.633850 -2.384140 -3.761230              |
| C -0.560150 -0.341380 -4.449610  | C -0.560150 -0.341380 -4.449610              | C -1.037410 -0.044720 -4.665600              | C -1.101650 -0.255780 -4.698450              | C -0.584090 -0.390230 -4.419150              |
| C -1.832790 -0.437720 -3.776410  | C -1.832790 -0.437720 -3.776410              | C -3.412610 -0.211240 -3.945570              | C -3.463870 -0.006020 -3.959470              | C -1.813810 -0.474850 -3.761230              |
| C -0.831270 -1.486370 -3.671500  | C -0.831270 -1.486370 -3.671500              | C -0.730770 -1.222030 -3.954480              | C -0.763070 -0.948640 -4.049760              | C -0.847370 -1.528010 -3.627900              |
| N -2.828890 -2.803890 -2.820040  | N -2.828890 -2.803890 -2.820040              | N -0.390830 -2.871760 -3.698050              | C -0.298850 -2.955210 -3.711160              | N -2.869240 -2.802310 -2.819280              |
| N -2.175310 -3.792010 -3.226240  | N -2.175310 -3.792010 -3.226240              | N -0.444050 -2.493190 -4.891250              | N -0.475180 -2.265360 -5.037270              | N -2.225300 -3.806440 -3.199460              |
| C -0.682390 -3.775380 -2.990810  | C -0.682390 -3.775380 -2.990810              | C -0.682390 -3.775380 -2.990810              | N -0.901370 -1.085410 -5.016620              | C -0.736320 -3.788870 -3.013420              |
| C -2.952600 -0.408060 -1.874680  | C -2.952600 -0.408060 -1.874680              | C -0.236320 -0.785970 -3.398180              | C -1.295140 -4.187270 -3.741960              | C -2.967750 -0.425790 -1.874550              |
| C -0.043420 -3.743590 -4.412310  | C -0.043420 -3.743590 -4.412310              | C -0.150140 -0.327390 -5.935710              | H -1.408570 -4.506870 -2.686270              | C -0.122430 -3.835420 -4.475600              |
| H -0.375040 -2.812290 -4.910370  | H -0.375040 -2.812290 -4.910370              | C -1.154470 -0.846050 -0.089600              | C -2.692150 -3.816040 -4.301530              | H -0.925860 -3.489670 -4.364020              |
| H -1.054650 -3.656120 -4.299840  | H -1.054650 -3.656120 -4.299840              | H -1.696040 -1.831380 -5.682360              | H -3.136750 -2.921990 -3.837620              | C -0.854900 -2.895360 -5.465820              |
| C -0.386200 -4.958610 -5.303160  | C -0.386200 -4.958610 -5.303160              | H -2.437930 -0.109400 -6.776700              | H -6.632110 -3.641890 -5.389670              | H -0.267440 -2.819840 -6.398000              |
| H -0.036450 -5.887870 -4.816070  | H -0.036450 -5.887870 -4.816070              | H -3.444300 -0.525360 -6.886670              | H -3.387260 -4.656850 -4.129070              | H -1.847210 -3.302620 -5.721110              |
| H -1.484460 -5.045410 -5.393840  | H -1.484460 -5.045410 -5.393840              | C -2.131700 -1.150720 -7.321750              | C -0.476260 -1.495800 -1.630600              | H -0.999990 -1.872510 -5.085320              |
| C -0.296420 -5.019770 -2.182210  | C -0.296420 -5.019770 -2.182210              | H -2.890800 -1.721770 -7.854780              | C -1.166470 -3.388510 -3.564490              | C -0.318150 -4.998710 -2.168470              |
| C -1.035540 -5.496490 -1.771910  | C -1.035540 -5.496490 -1.771910              | C -0.831290 -1.212840 -7.177870              | C -2.160590 -0.899710 -4.39850               | C -1.054460 -3.304920 -2.004640              |
| H -1.803630 -4.996410 -2.775180  | H -1.803630 -4.996410 -2.775180              | H -0.581180 -0.651560 -7.598790              | H -1.878550 -2.236930 -5.262030              | H -1.812470 -4.686540 -2.495700              |
| C -1.393250 -6.613040 -1.400180  | C -1.393250 -6.613040 -1.400180              | C -0.151550 -0.939450 -6.491180              | H -3.507600 -3.272550 -4.271370              | C -1.456780 -6.391100 -1.209160              |
| H -2.429600 -6.964970 -1.405370  | H -2.429600 -6.964970 -1.405370              | H -1.156950 -1.357020 -6.378960              | H -4.263400 -2.883690 -4.959880              | H -2.522530 -6.609900 -1.090390              |
| C -0.425100 -7.276810 -0.623070  | C -0.425100 -7.276810 -0.623070              | C -2.266280 -1.262350 -5.984360              | C -3.880070 -4.138800 -3.227960              | C -0.493090 -7.193430 -5.670400              |
| H -0.703970 -8.147820 -0.022140  | H -0.703970 -8.147820 -0.022140              | H -2.781350 -0.281690 -5.916160              | H -4.927580 -4.427010 -3.097140              | H -0.805880 -8.038860 -0.053420              |
| C -0.903160 -6.812640 -0.625650  | C -0.903160 -6.812640 -0.625650              | C -3.201590 -2.355610 -5.408370              | H -2.894560 -4.633070 -2.351140              | C -0.872660 -6.901270 -0.730930              |
| H -1.665030 -7.322190 -0.027570  | H -1.665030 -7.322190 -0.027570              | H -2.715100 -3.357700 -5.579600              | H -3.172060 -5.307400 -1.534960              | H -1.629710 -7.521040 -0.240260              |
| C -1.261170 -5.692520 -1.397480  | C -1.261170 -5.692520 -1.397480              | H -3.399810 -2.248780 -4.330920              | C -1.548890 -4.263220 -2.519440              | C -1.277610 -5.812270 -1.526580              |
| C -2.297810 -5.344200 -1.398640  | C -2.297810 -5.344200 -1.398640              | H -4.174840 -2.309940 -5.928500              | H -0.793850 -4.649530 -1.827420              | H -2.341890 -5.601270 -1.660700              |
| C -0.252470 -4.830590 -6.701150  | C -0.252470 -4.830590 -6.701150              | C -1.990220 -1.586810 -7.473450              | C -0.740140 -5.369930 -4.573700              | C -0.114430 -5.265510 -5.069830              |
| H -0.009570 -5.706610 -7.328330  | H -0.009570 -5.706610 -7.328330              | H -1.451670 -0.778230 -7.991600              | H -0.527740 -5.043640 -5.606960              | H -1.138730 -5.677580 -5.103750              |
| H -0.112430 -3.928060 -7.225880  | H -0.112430 -3.928060 -7.225880              | H -1.389240 -2.509280 -7.557050              | H -0.182940 -5.797710 -4.152330              | H -0.271320 -5.225990 -6.104760              |
| H -1.354600 -4.758840 -6.633960  | H -1.354600 -4.758840 -6.633960              | H -2.950180 -1.752710 -7.994840              | H -1.501170 -6.170080 -4.616270              | H -0.517080 -5.958990 -4.494080              |
| [c-c]-Pz-PCIPr-2<br>-3164.585032 | TS-[b-c]-PCPr<br>-3164.567537<br>1 (-256.35) | TS-[b-c]-PCPr<br>-3164.564624<br>1 (-220.80) | TS-[c-d]-PCPr<br>-3164.567404<br>1 (-248.99) | TS-[c-d]-PCPr<br>-3164.565067<br>1 (-215.50) |
| C -0.444720 -1.104280 -3.469420  | C -1.609470 -0.308126 -3.290634              | C -0.721263 -0.042028 -3.500250              | C -0.636023 -1.355249 -3.724778              | C -0.805845 -1.155686 -3.680938              |
| C -1.343350 -0.048520 -3.446800  | C -0.574581 -0.724528 -3.291366              | C -0.507113 -1.488243 -3.562196              | C -0.092060 -0.089232 -3.699354              | C -0.012246 -0.055661 -3.643961              |
| C -2.730920 -0.474030 -3.387500  | C -0.727288 -0.067836 -3.475457              | C -0.930629 -1.742626 -3.454469              | C -1.513320 -0.405549 -3.427537              | C -1.413400 -0.364667 -3.442421              |
| C -2.658880 -1.933980 -3.377140  | C -0.486038 -1.370342 -3.574144              | C -2.727383 -0.337669 -2.469025              | C -1.637792 -1.849455 -3.284679              | C -1.440934 -1.819912 -3.348936              |
| C -1.251160 -2.322700 -3.430560  | C -0.956450 -1.602355 -3.466806              | C -2.295626 -1.496001 -1.716516              | C -0.312987 -2.439400 -3.472079              | C -0.072191 -2.318060 -3.502247              |
| C -0.787510 -1.063120 -2.783500  | C -2.723533 -0.192311 -2.435138              | C -2.553637 -2.706621 -1.845784              | C -1.943200 -1.435013 -3.201482              | C -2.093702 -1.160950 -3.108831              |
| C -1.244970 -2.200220 -2.016530  | C -3.219917 -1.361692 -1.712203              | C -1.400955 -2.806912 -2.734196              | C -2.343635 -2.582331 -2.390457              | C -2.541346 -2.304336 -3.218807              |
| C -0.465900 -3.385980 -1.976730  | C -2.590119 -2.603351 -1.877199              | C -0.457827 -3.761372 -2.081376              | C -1.429120 -3.615940 -2.142764              | C -1.697093 -3.407881 -2.141167              |
| C -0.799550 -3.444530 -2.703570  | C -1.443616 -2.730155 -2.774099              | C -0.920731 -3.519327 -2.177812              | C -0.880282 -3.551822 -2.708772              | C -0.369434 -3.418688 -2.750347              |
| C -1.733940 -4.205130 -1.877660  | C -0.514178 -3.664550 -2.149612              | C -1.412672 -3.327254 -2.934871              | C -0.824568 -4.105299 -1.697988              | C -0.531113 -4.067773 -1.802613              |
| C -3.085480 -8.334640 -1.821540  | C -0.867978 -3.444640 -2.245576              | C -2.553765 -1.839869 -2.201493              | C -2.094172 -3.540475 -1.510923              | C -1.844237 -3.598988 -1.650136              |
| C -3.595580 -2.685000 -2.589280  | C -1.378124 -2.287659 -2.974557              | C -1.820308 -0.475026 -2.776648              | C -2.516387 -4.022218 -2.321902              | C -2.313582 -2.465462 -2.441960              |
| C -4.539990 -1.999250 -1.767210  | C -2.530839 -1.794457 -2.233631              | C -1.727078 -1.672362 -1.962313              | C -3.273179 -1.521755 -1.450358              | C -3.163547 -1.667660 -1.572880              |
| C -4.568590 -0.595110 -1.762870  | C -1.835922 -0.549520 -2.745737              | C -0.465854 -2.525811 -1.964609              | C -2.210409 -0.434806 -2.558982              | C -2.212036 -0.307663 -2.570900              |
| C -3.677490 -0.173680 -2.990920  | C -1.767396 -1.725384 -1.894144              | C -0.742140 -1.721557 -2.522560              | C -1.673798 -1.682960 -2.831267              | C -1.776007 -0.558175 -1.988405              |
| C -4.55110 -1.537820 -1.960300   | C -0.519154 -2.587185 -1.837472              | C -2.853478 -0.819446 -1.599505              | C -0.296256 -2.178126 -4.440086              | C -0.424585 -2.275727 -3.328485              |
| C -2.007100 -2.147040 -2.061730  | C -0.702951 -1.826648 -2.438142              | C -1.857966 -1.810277 -1.614717              | C -0.502363 -1.059606 -3.169044              | C -0.476811 -1.224948 -3.054159              |
| C -0.995840 -1.190870 -2.727650  | C -2.827413 -0.943279 -1.534841              | C -2.326022 -3.556852 -0.665432              | C -2.542686 -2.57581 -2.604975               | C -2.583090 -0.835582 -2.452110              |
| C -1.134480 -0.119060 -2.018730  | C -1.814012 -1.915026 -1.525234              | C -2.828636 -3.187177 -0.621562              | C -1.814076 -0.945302 -2.567074              | C -1.716351 -1.182569 -2.404315              |
| C -0.295670 -1.200630 -1.978860  | C -2.373108 -3.465228 -0.720580              | C -3.514280 -1.873040 -0.759648              | C -1.355553 -4.218176 -0.816460              | C -1.615491 -0.495074 -2.083327              |
| C -0.314330 -4.115100 -0.720990  | C -2.863437 -3.112757 -0.578125              | C -3.644962 -1.043690 -0.016547              | C -2.255716 -3.835630 -0.230360              | C -2.446047 -3.648558 -0.256050              |
| C -1.014080 -3.718480 -0.465350  | C -3.526433 -1.799893 -0.754212              | C -1.772800 -3.707482 -1.007272              | C -3.218683 -2.740813 -0.027623              | C -3.730789 -2.481126 -0.071053              |
| C -1.835830 -2.487600 -0.425430  | C -3.647143 -0.937140 -0.383900              | C -1.250579 -4.214644 -0.226189              | C -3.208698 -2.109437 -1.315023              | C -3.331125 -1.808789 -1.195166              |
| C -1.895930 -1.743250 -0.799680  | C -1.720974 -3.679394 -1.084537              | C -0.205422 -4.465665 -0.328100              | C -2.620967 -3.374849 -1.059014              | C -2.413164 -3.513762 -0.315542              |
| C -3.792180 -3.864520 -5.343880  | C -1.194026 -4.210908 -0.371720              | C -1.030395 -4.192680 -0.810045              | C -1.906002 -3.848146 -0.987328              | C -1.728444 -3.974338 -0.843174              |
| C -3.163100 -4.349810 -0.650140  | C -0.265749 -4.438766 -0.238683              | C -3.169219 -1.402727 -0.872184              | C -0.564121 -4.443407 -0.789079              | C -3.341964 -4.049287 -0.681214              |
| C -1.736700 -4.741980 -0.589190  | C -1.089963 -4.120005 -0.887899              | C -3.504814 -0.646951 -0.270455              | C -0.036871 -4.516895 -0.540772              | C -2.309399 -4.461689 -0.627628              |
| C -1.044430 -4.621280 -0.659420  | C -3.184884 -0.139539 -0.852712              | C -3.298729 -2.112846 -0.193883              | C -3.068801 -0.704125 -0.388436              | C -3.155791 -0.526499 -0.434449              |
| C -4.771990 -0.124570 -0.512550  | C -3.510871 -0.689697 -0.267778              | C -2.782661 -2.667817 -1.022078              | C -3.239843 -0.158007 -0.921242              | C -3.337960 -0.072474 -0.848769              |
| C -5.034530 -0.571980 -0.715680  | C -3.278406 -2.145682 -0.152462              | C -0.009856 -2.722740 -0.475915              | C -3.380264 -1.310967 -1.059262              | C -3.380452 -1.508816 -0.935645              |
| C -4.982570 -2.050900 -0.717650  | C -2.748189 -2.657448 -1.076021              | C -0.832079 -2.604728 -0.671603              | C -3.348800 -2.120392 -0.122490              | C -3.247458 -2.314554 -0.268899              |
| C -4.687540 -2.727090 -0.509220  | C -0.050970 -2.768459 -0.370896              | C -2.156243 -1.947895 -0.533417              | C -0.592505 -2.386683 -1.180174              | C -4.081806 -2.494572 -1.028129              |
| C -1.342250 -2.351810 -0.688450  | C -0.897053 -2.603027 -0.768018              | C -2.484521 -1.412283 -0.749262              | C -0.074997 -2.645048 -0.123389              | C -0.179914 -2.665184 -0.262483              |
| C -2.035130 -2.398730 -0.555740  | C -2.209562 -1.922948 -0.606233              | C -3.424203 -0.385762 -0.329470              | C -1.348656 -2.348147 -0.403685              | C -1.587500 -2.261320 -0.475720              |
| C -3.430870 -1.878820 -0.619970  | C -2.524193 -1.414294 -0.690279              | C -3.073319 -1.022566 -0.901837              | C -2.138153 -1.793695 -0.664083              | C -2.291939 -1.685209 -0.638455              |
| C -4.008840 -1.136100 -0.559950  | C -3.400780 -0.485371 -0.274                 |                                              |                                              |                                              |

|                                                                                                                                                                                                                                                                                                            |                                 |                                |                                |                                 |                                 |
|------------------------------------------------------------------------------------------------------------------------------------------------------------------------------------------------------------------------------------------------------------------------------------------------------------|---------------------------------|--------------------------------|--------------------------------|---------------------------------|---------------------------------|
| H 1.794480 -2.975490 7.630820                                                                                                                                                                                                                                                                              | H 0.417412 -5.617517 5.042297   | C -0.908068 -7.497184 2.022929 | H -0.615888 -8.506937 2.359272 | H -2.625592 -3.151550 6.778407  | H -0.392052 -6.004966 4.557129  |
| C -0.099920 -3.357600 6.37050                                                                                                                                                                                                                                                                              | D 2.101229 -5.342433 4.581996   | H -0.615888 -8.506937 2.359272 | H -0.615888 -8.506937 2.359272 | C -3.322267 -4.645728 5.362734  | H 0.386645 -4.815187 5.619466   |
| H -0.690950 -3.305620 7.556510                                                                                                                                                                                                                                                                             | C -0.503005 -4.939479 2.435951  | H -1.980707 -7.362186 2.560694 | H -4.210392 -4.904457 5.945748 | C 0.695574 -4.906794 2.141842   | C 0.695574 -4.906794 2.141842   |
| C -0.729820 -3.614990 5.403770                                                                                                                                                                                                                                                                             | C -1.583679 -5.234115 3.308941  | H -0.796261 -7.464222 0.923526 | C 3.061686 -5.299771 4.144194  | C -0.218688 -5.988445 1.986633  | C -0.218688 -5.988445 1.986633  |
| H -1.813080 -3.764920 5.359560                                                                                                                                                                                                                                                                             | H -1.716642 -4.647685 4.221762  | C -0.591972 -0.596378 3.339804 | H -3.750914 -6.062877 3.771940 | H -1.208475 -5.932095 2.444847  | H -1.208475 -5.932095 2.444847  |
| C 0.029190 -3.682020 4.223250                                                                                                                                                                                                                                                                              | C -2.508189 -6.243614 2.994688  | C -1.606634 -0.455062 3.314523 | C -1.916269 -4.973755 3.400721 | C 0.105749 -7.108975 1.208050   | C 0.105749 -7.108975 1.208050   |
| H -0.472770 -3.881710 3.271000                                                                                                                                                                                                                                                                             | H -3.342319 -6.444289 3.672788  | C 0.302648 -3.698882 4.318092  | H -1.735081 -5.477059 2.447120 | H -0.622660 -7.916635 1.092488  | H -0.622660 -7.916635 1.092488  |
| C 1.996090 -4.882620 2.152270                                                                                                                                                                                                                                                                              | C -2.361777 -6.991987 1.811604  | C -0.751032 -4.304187 5.061016 | C 0.862367 -4.738899 2.249052  | C 1.358685 -7.190297 0.571049   | C 1.358685 -7.190297 0.571049   |
| H 1.025700 -4.750420 1.631730                                                                                                                                                                                                                                                                              | H -0.679667 -7.783619 1.571022  | H -1.541710 -4.847309 4.538217 | H 0.198803 -5.013177 1.403540  | H 1.615203 -8.066882 -0.029957  | H 1.615203 -8.066882 -0.029957  |
| C 3.094750 -5.167600 1.096200                                                                                                                                                                                                                                                                              | C -1.289557 -6.718377 0.939536  | C -0.826361 -4.172751 6.455326 | H 1.778301 -4.323091 1.787333  | C 3.227605 -6.311166 0.708775   | C 3.227605 -6.311166 0.708775   |
| H 3.312100 -4.315200 0.434900                                                                                                                                                                                                                                                                              | H -1.165491 -7.301969 0.023498  | H -1.657434 -4.632728 6.997137 | H 1.218458 -6.033472 3.025204  | H 3.251191 -6.183164 0.217899   | H 3.251191 -6.183164 0.217899   |
| H 4.036310 -5.459110 1.593550                                                                                                                                                                                                                                                                              | C -0.374783 -5.698377 1.242559  | C -0.826361 -4.172751 6.455326 | H 1.886751 -5.783195 3.868239  | C 1.949411 -5.001112 1.473788   | C 1.949411 -5.001112 1.473788   |
| H 2.775190 -6.008200 0.454440                                                                                                                                                                                                                                                                              | H 0.464920 -5.503437 0.573405   | H 0.100016 -3.344287 8.240463  | H 0.306028 -6.467015 3.471832  | H 2.683282 -4.200408 1.573880   | H 2.683282 -4.200408 1.573880   |
| C 1.896920 -6.109170 3.092940                                                                                                                                                                                                                                                                              | C 1.562110 -4.491050 6.516817   | C 1.208272 -2.840906 6.438017  | C 1.898085 -7.069194 2.108212  | C -1.751568 -5.137668 6.023329  | C -1.751568 -5.137668 6.023329  |
| H 2.811100 -6.201160 3.705930                                                                                                                                                                                                                                                                              | H 1.857617 -5.384311 7.093014   | H 1.978932 -2.275748 6.969496  | H 2.139334 -7.989729 2.666132  | H -1.573296 -5.913725 6.787142  | H -1.573296 -5.913725 6.787142  |
| H 1.031760 -6.054480 3.771770                                                                                                                                                                                                                                                                              | H 2.397311 -3.768624 6.563984   | C -1.279120 -2.956865 5.041553 | H 1.243644 -7.349578 1.262636  | H -1.924817 -4.181682 6.549651  | H -1.924817 -4.181682 6.549651  |
| H 1.808880 -7.026200 2.483920                                                                                                                                                                                                                                                                              | H 0.693141 -4.033742 7.024331   | H 2.119909 -2.491246 4.513855  | H 2.839474 -6.674535 1.687144  | H -2.683164 -5.398400 5.488565  | H -2.683164 -5.398400 5.488565  |
| <div> <div>TS-[b-c]-PCIPr<br/>-3164.555735<br/>1 (-178.09)</div> <div>TS-[b-c]*-PCIPr<br/>-3164.552193<br/>1 (-165.12)</div> <div>TS-[c-d]-PCIPr<br/>-3164.555344<br/>1 (-174.18)</div> <div>TS-[c-d]*-PCIPr<br/>-3164.553061<br/>1 (-159.52)</div> <div>[a-a]-open-PCPr<br/>-3055.1186<br/>0</div> </div> |                                 |                                |                                |                                 |                                 |
| C -1.438377 0.590532 3.347579                                                                                                                                                                                                                                                                              | C 0.692604 -0.093630 3.462117   | C -0.694204 1.181336 3.703902  | C -0.811781 1.241632 3.702027  | C -2.371887 0.997290 1.387828   | C -2.371887 0.997290 1.387828   |
| C -0.413707 -0.454997 3.353705                                                                                                                                                                                                                                                                             | C 0.473609 1.349874 3.569653    | C 0.093327 -0.047093 3.650876  | C 0.004715 0.030532 3.694603   | C -2.896716 0.842653 0.016034   | C -2.896716 0.842653 0.016034   |
| C 0.895665 0.199987 3.457548                                                                                                                                                                                                                                                                               | C 0.964172 1.603263 3.461300    | C 1.502088 1.302774 3.416958   | C 1.404542 0.442525 3.484325   | C -2.869250 -1.305033 -0.021598 | C -2.869250 -1.305033 -0.021598 |
| C 0.673448 1.641305 3.515837                                                                                                                                                                                                                                                                               | C -2.750011 0.224342 2.422230   | C 1.560841 0.749725 3.319225   | C 1.434149 1.894153 3.349180   | C -2.343355 -1.498463 0.344633  | C -2.343355 -1.498463 0.344633  |
| C -0.768529 1.884389 3.452160                                                                                                                                                                                                                                                                              | C -3.228926 1.404295 1.704617   | C 0.206566 2.315210 3.502074   | C 0.066539 2.390837 3.491029   | C -2.180358 -0.261911 2.124483  | C -2.180358 -0.261911 2.124483  |
| C -2.581494 0.457299 3.535550                                                                                                                                                                                                                                                                              | C -2.581952 2.636376 1.876482   | C -1.995932 1.912610 3.163544  | C -2.102567 1.232048 3.138023  | C -1.510931 2.085810 1.649746   | C -1.510931 2.085810 1.649746   |
| C -3.090886 1.605382 1.787218                                                                                                                                                                                                                                                                              | C -1.434764 2.741948 2.775144   | C -2.438797 2.368479 2.383150  | C -2.554360 2.352971 2.317567  | C -0.518666 2.055703 2.704999   | C -0.518666 2.055703 2.704999   |
| C -2.445319 2.846473 1.885328                                                                                                                                                                                                                                                                              | C -0.491096 3.666239 2.156701   | C -1.569933 3.450983 2.182572  | C -1.706334 3.449660 2.105141  | C -0.373604 0.898695 3.469752   | C -0.373604 0.898695 3.469752   |
| C -1.267624 2.992690 3.737366                                                                                                                                                                                                                                                                              | C 0.887780 3.424995 2.252773    | C -0.227744 3.432283 2.759988  | C 0.376631 3.477435 2.709692   | C -1.199147 -0.269090 3.177774  | C -1.199147 -0.269090 3.177774  |
| C -0.350776 3.894263 2.048452                                                                                                                                                                                                                                                                              | C 1.378979 2.256302 2.975255    | C 0.664432 4.058886 1.789657   | C 0.521760 4.097227 1.740868   | C -0.347730 -1.427537 3.429062  | C -0.347730 -1.427537 3.429062  |
| C 1.031932 3.662640 2.104347                                                                                                                                                                                                                                                                               | C 2.562772 1.750361 2.231392    | C 1.962182 3.595651 1.606819   | C 1.833912 3.621983 1.598214   | C -0.467444 -2.560418 2.624676  | C -0.467444 -2.560418 2.624676  |
| C 1.554240 2.526072 2.855386                                                                                                                                                                                                                                                                               | C 1.797296 -0.585464 2.726744   | C 2.426036 2.417581 2.389843   | C 2.304793 2.511882 2.421121   | C -1.459369 1.257625 1.568709   | C -1.459369 1.257625 1.568709   |
| C 2.675620 1.992543 2.093344                                                                                                                                                                                                                                                                               | C 1.709365 -1.748730 1.870567   | C 3.234389 1.599117 1.503542   | C 3.150611 1.687026 1.572896   | C -0.863102 -3.294514 0.447344  | C -0.863102 -3.294514 0.447344  |
| C 1.975652 -0.322576 2.708722                                                                                                                                                                                                                                                                              | C 0.460289 -2.621823 1.828627   | C 2.260460 -0.445497 2.536818  | C 2.199323 -0.348559 2.640963  | C -1.094045 -2.818003 -0.845103 | C -1.094045 -2.818003 -0.845103 |
| C 1.867488 -1.530284 1.915199                                                                                                                                                                                                                                                                              | C -0.758476 -1.832546 2.421797  | C 1.775339 -1.697110 1.958106  | C 1.752407 -1.616350 2.085152  | C -2.031936 -1.735873 -1.081028 | C -2.031936 -1.735873 -1.081028 |
| C 0.616661 -2.394449 1.937438                                                                                                                                                                                                                                                                              | C -2.867213 -0.905976 1.516167  | C 0.424239 -2.280892 2.345545  | C 0.411243 -2.237013 2.465864  | C -1.440966 -0.888924 -2.132235 | C -1.440966 -0.888924 -2.132235 |
| C -0.582732 -1.600652 2.559289                                                                                                                                                                                                                                                                             | C -1.869027 -1.894187 1.505731  | C -0.435860 -1.199913 3.068812 | C -0.488274 -1.160087 3.148762 | C -1.459033 0.531529 -2.107843  | C -1.459033 0.531529 -2.107843  |
| C -2.725344 -0.710193 1.681705                                                                                                                                                                                                                                                                             | C -2.350616 3.500368 0.724531   | C -2.528369 0.031612 2.519239  | C -2.596178 0.016937 2.518320  | C -0.758753 1.327825 -1.027655  | C -0.758753 1.327825 -1.027655  |
| C -1.723467 -1.694125 1.676342                                                                                                                                                                                                                                                                             | C -2.844459 3.161127 -0.577001  | C -1.741499 -1.132600 2.452738 | C -1.786332 -1.134110 2.503539 | C -0.932339 2.857662 0.554872   | C -0.932339 2.857662 0.554872   |
| C -2.259361 -1.636404 0.691424                                                                                                                                                                                                                                                                             | C -3.524343 1.858427 -0.760130  | C -1.505215 4.062593 0.876244  | C -1.628120 4.060413 0.782846  | C -1.153516 2.421236 -0.753609  | C -1.153516 2.421236 -0.753609  |
| C -2.797299 3.268899 -0.576371                                                                                                                                                                                                                                                                             | C -3.658865 0.992192 0.373614   | C -2.370920 3.705708 -0.196160 | C -2.462720 3.621568 -0.295404 | C 0.961879 0.465982 3.867520    | C 0.961879 0.465982 3.867520    |
| C -3.477569 1.957838 -0.681969                                                                                                                                                                                                                                                                             | C 1.745822 3.653189 1.094133    | C -3.284344 2.590681 0.012538  | C -3.354618 2.461085 -0.073488 | C 2.128079 1.231588 3.953132    | C 2.128079 1.231588 3.953132    |
| C -3.565766 1.137693 0.490554                                                                                                                                                                                                                                                                              | C 1.228639 4.197380 -0.125112   | C -3.264187 1.889755 1.279466  | C -3.345279 1.825705 1.211549  | C 1.968444 2.449951 2.712101    | C 1.968444 2.449951 2.712101    |
| C 1.847272 3.845571 0.907492                                                                                                                                                                                                                                                                               | C -0.227693 4.447209 -0.227619  | C 2.515046 3.460392 2.58693    | C 2.417250 3.497835 2.64851    | C 0.653097 2.815062 2.285601    | C 0.653097 2.815062 2.285601    |
| C 1.284259 4.338082 -0.313783                                                                                                                                                                                                                                                                              | C -1.058218 4.135920 0.896583   | C 1.795351 3.935261 -0.883934  | C 1.711041 3.924842 -0.904351  | C 0.721437 -3.277402 1.271874   | C 0.721437 -3.277402 1.271874   |
| C -0.176148 4.577945 -0.373775                                                                                                                                                                                                                                                                             | C 3.159583 -0.185259 0.844669   | C 0.424521 4.461455 -0.689989  | C 0.325179 4.425781 -0.752908  | C 0.028416 -2.897923 2.618103   | C 0.028416 -2.897923 2.618103   |
| C -0.964548 4.309864 0.790996                                                                                                                                                                                                                                                                              | C 3.497459 0.643684 -0.270216   | C -0.124840 4.468389 0.632769  | C -0.251727 4.457034 0.557245  | C 2.160992 -1.706269 3.487534   | C 2.160992 -1.706269 3.487534   |
| C 3.268977 0.000753 0.766285                                                                                                                                                                                                                                                                               | C 3.284838 2.102708 -0.148500   | C 3.144389 -0.594381 0.370475  | C 3.136861 -0.538797 0.500219  | C 0.977988 -0.997903 3.841985   | C 0.977988 -0.997903 3.841985   |
| C 3.562276 0.786148 -0.393787                                                                                                                                                                                                                                                                              | C 2.759850 2.616576 1.081574    | C 3.311342 -0.002140 -0.918744 | C 3.314720 0.021705 -0.800448  | C -0.018805 -2.761078 1.810233  | C -0.018805 -2.761078 1.810233  |
| C 3.468463 2.248607 -0.324517                                                                                                                                                                                                                                                                              | C -0.009605 -2.761334 0.351156  | C 3.387543 1.474254 -1.010226  | C 3.359062 1.496682 -0.931026  | C 1.278516 -3.283705 -1.511590  | C 1.278516 -3.283705 -1.511590  |
| C 2.863578 2.811650 0.900910                                                                                                                                                                                                                                                                               | C 0.837479 -2.599348 -0.788599  | C 3.301030 2.242332 0.195779   | C 3.231725 2.295757 0.250882   | C 1.540371 -3.774888 -0.140030  | C 1.540371 -3.774888 -0.140030  |
| C 0.094736 -2.588264 -0.485018                                                                                                                                                                                                                                                                             | C 2.159172 -1.947752 -0.624397  | C -0.439326 -2.501294 1.058964 | C -0.423625 -2.485883 1.163082 | C 0.479137 -3.721102 0.821078   | C 0.479137 -3.721102 0.821078   |
| C 0.902076 -2.483885 -0.686315                                                                                                                                                                                                                                                                             | C 2.477971 -1.453972 0.677843   | C 0.108317 -2.674743 -0.251602 | C 0.155367 -2.689227 -0.126153 | C -0.246379 1.251770 -2.547766  | C -0.246379 1.251770 -2.547766  |
| C 2.228731 -1.822455 -0.592563                                                                                                                                                                                                                                                                             | C -3.431703 -4.433607 -0.257455 | C 1.513544 -2.286085 -0.501718 | C 1.560909 -2.296982 -0.355258 | C 0.898208 0.601159 -3.104922   | C 0.898208 0.601159 -3.104922   |
| C 2.591805 -1.277399 0.678200                                                                                                                                                                                                                                                                              | C -3.071713 -1.029516 -0.991410 | C 2.257311 -1.731001 0.598208  | C 2.260945 -1.680420 0.742146  | C 0.915157 -0.871025 -3.131387  | C 0.915157 -0.871025 -3.131387  |
| C -3.336067 -0.290188 0.424605                                                                                                                                                                                                                                                                             | C -2.028079 -2.076564 -0.999675 | C -3.318966 0.444797 1.364266  | C -3.370347 0.387756 1.335446  | C -0.213914 -1.565182 -2.597105 | C -0.213914 -1.565182 -2.597105 |
| C -3.020224 -0.934465 -0.812023                                                                                                                                                                                                                                                                            | C -1.405719 -2.449347 0.242077  | C -3.402220 0.365590 1.89696   | C -3.415666 -0.459828 1.811569 | C 0.00171 3.308525 0.944097     | C 0.00171 3.308525 0.944097     |
| C -1.971969 -1.975209 0.815496                                                                                                                                                                                                                                                                             | C -3.450203 1.220661 -2.039246  | C -2.590233 1.690252 0.124844  | C -2.576353 -1.676130 0.166537 | C 1.459507 3.411584 -0.013991   | C 1.459507 3.411584 -0.013991   |
| C -1.302449 -2.291463 -0.417004                                                                                                                                                                                                                                                                            | C -2.802565 1.865187 -3.176713  | C -1.743869 1.932145 1.237488  | C -1.745772 -1.959035 1.305157 | C 1.208804 2.963161 -0.020406   | C 1.208804 2.963161 -0.020406   |
| C -3.448013 1.269024 -1.936378                                                                                                                                                                                                                                                                             | C -2.160037 3.099852 3.003311   | C -3.651112 1.761870 -1.118550 | C -3.681942 1.626091 1.189686  | C -0.077469 2.423324 -1.719573  | C -0.077469 2.423324 -1.719573  |
| C -2.842915 1.868571 -3.121341                                                                                                                                                                                                                                                                             | C -2.142096 3.729314 1.688196   | C -3.222983 2.109291 -2.469315 | C -3.233005 1.946072 -2.540479 | C 3.043177 2.827656 1.850800    | C 3.043177 2.827656 1.850800    |
| C -2.200229 3.111124 -3.021302                                                                                                                                                                                                                                                                             | C -0.849025 4.364167 -1.515555  | C -2.358677 3.195980 -2.666660 | C -2.388103 3.045759 2.750510  | C 4.314106 2.128196 1.845430    | C 4.314106 2.128196 1.845430    |
| C -2.138178 3.795352 -1.734309                                                                                                                                                                                                                                                                             | C -0.067897 4.130388 -2.742433  | C -1.895050 3.970569 -1.520902 | C -1.964973 3.860921 -1.617103 | C 4.469569 0.987572 3.637578    | C 4.469569 0.987572 3.637578    |
| C -0.842870 4.439543 -1.634332                                                                                                                                                                                                                                                                             | C 1.311080 3.890857 -2.625953   | C -0.514911 4.342644 -1.763522 | C -0.588542 4.256907 -1.841827 | C 3.358178 0.502808 3.452875    | C 3.358178 0.502808 3.452875    |
| C -0.103989 4.159379 -2.858948</                                                                                                                                                                                                                                                                           |                                 |                                |                                |                                 |                                 |

|             |           |           |             |           |           |             |           |           |             |           |           |             |           |           |
|-------------|-----------|-----------|-------------|-----------|-----------|-------------|-----------|-----------|-------------|-----------|-----------|-------------|-----------|-----------|
| C -1.285666 | 0.839566  | 2.710960  | C -1.584605 | 0.781023  | 2.571307  | C -1.485538 | 1.339680  | 3.191463  | C -1.530066 | 1.599618  | 3.227350  | C -2.389236 | 0.994586  | 1.357860  |
| C -0.517636 | -0.393964 | 2.796782  | C -0.893024 | -0.495229 | 2.649874  | C -0.543520 | 0.237149  | 3.254031  | C -0.645121 | 0.455478  | 3.351914  | C -2.903505 | 0.843654  | -0.019310 |
| C 0.911532  | -0.018051 | 2.799916  | C 0.553719  | -0.210268 | 2.736753  | C 0.805066  | 0.807958  | 3.244781  | C 0.729489  | 0.957775  | 3.328577  | C -2.880112 | -1.294371 | -0.069872 |
| C 0.964568  | 1.461716  | 2.846051  | C 0.689999  | 1.262527  | 2.831952  | C 0.686944  | 2.263652  | 3.167524  | C 0.685877  | 2.412317  | 3.180875  | C -2.361480 | -1.499216 | 1.298727  |
| C -0.395831 | 1.981262  | 2.804797  | C -0.634758 | 1.864400  | 2.744209  | C -0.736689 | 2.596423  | 3.140997  | C -0.719001 | 2.814566  | 3.133001  | C -2.202516 | -0.268933 | 2.106205  |
| C -2.438201 | 0.902681  | 1.913193  | C -2.691968 | 0.934745  | 1.724117  | C -2.657624 | 1.186094  | 2.439420  | C -2.703022 | 1.470579  | 2.472174  | C -1.530689 | 0.280691  | 1.632668  |
| C -2.738357 | 2.119039  | 1.167532  | C -2.884838 | 2.187915  | 1.004446  | C -3.146336 | 2.297262  | 1.626186  | C -3.130568 | 2.563729  | 1.607246  | C -0.546053 | 2.044114  | 2.695068  |
| C -1.891092 | 2.233406  | 1.268270  | C -1.979977 | 2.246287  | 1.180095  | C -2.431782 | 3.504616  | 1.578077  | C -2.355104 | 3.729815  | 1.503440  | C -0.406390 | 0.882651  | 3.454136  |
| C -0.700929 | 3.169709  | 2.111761  | C -0.837231 | 3.088314  | 2.076280  | C -1.202580 | 3.658364  | 2.350814  | C -1.124800 | 3.858072  | 2.279158  | C -1.229804 | -0.283078 | 3.148888  |
| C 0.355311  | 3.898019  | 1.421799  | C 0.290998  | 3.772787  | 1.459293  | C 1.097040  | 4.093462  | 1.529474  | C 1.199443  | 4.137007  | 1.460294  | C -0.380818 | -1.443498 | 3.398760  |
| C 1.671133  | 3.416175  | 1.467957  | C 1.572514  | 3.211791  | 1.550710  | C 2.610856  | 2.304168  | 1.592790  | C 2.620188  | 2.278265  | 1.622685  | C -0.495164 | -2.570533 | 2.585519  |
| C 1.979466  | 2.186165  | 2.196703  | C 1.774328  | 1.945691  | 2.253516  | C 2.691932  | 0.905589  | 1.642880  | C 2.631141  | 0.881868  | 1.740403  | C -1.479373 | -2.578240 | 1.522107  |
| C 2.993476  | 1.480205  | 1.432744  | C 2.780233  | 1.202665  | 1.514251  | C 1.788941  | 0.154837  | 2.486925  | C 1.684309  | 0.221213  | 2.610984  | C -0.875559 | -3.290016 | 0.400340  |
| C 2.948589  | 0.084615  | 1.355762  | C 2.658267  | -0.184962 | 1.391519  | C 1.527201  | -1.130594 | 1.862169  | C 1.360205  | -1.074772 | 2.044309  | C -1.097325 | -2.803998 | -0.890127 |
| C 1.912585  | -0.704732 | 2.049861  | C 1.545708  | -0.933165 | 2.011774  | C 0.354521  | -1.835191 | 2.228686  | C 0.154867  | -1.704475 | 2.434123  | C -2.032666 | -1.718747 | -1.126255 |
| C 1.641688  | -0.863556 | 1.181245  | C 1.250061  | -2.041424 | 1.088658  | C -0.796330 | -1.008108 | 2.629258  | C -0.955063 | -0.798260 | 2.785109  | C -1.433069 | -0.868965 | -2.168599 |
| C -0.497666 | -2.618677 | 1.132751  | C 0.028485  | -2.733156 | 0.966415  | C -2.894314 | -0.051853 | 1.703979  | C -2.996054 | 0.212163  | 1.793364  | C -1.449026 | 0.551015  | -2.135017 |
| C -1.063458 | -1.584089 | 2.294969  | C -1.477974 | -1.635798 | 2.043053  | C -1.986367 | -1.141152 | 1.762113  | C -2.144116 | -0.916289 | 1.910732  | C -2.066732 | 1.336946  | -1.053871 |
| C -2.742902 | -0.229390 | 1.044523  | C -3.017864 | -0.151522 | 0.806860  | C -2.266858 | 4.193501  | 0.382868  | C -2.146917 | 4.347739  | 0.198501  | C -0.943731 | 2.858955  | 0.546659  |
| C -1.985051 | -1.410974 | 1.108833  | C -2.332654 | -1.378236 | 0.869448  | C -2.905879 | 3.723800  | -0.889257 | C -2.801018 | 3.853953  | -0.975704 | C -1.155425 | 2.430284  | -0.765839 |
| C -1.569686 | 4.008445  | 0.074534  | C -1.557409 | 4.035402  | 0.028177  | C -3.672435 | 2.458554  | -0.830688 | C -3.630299 | 2.632377  | -0.864205 | C 0.925951  | 0.464886  | 3.858756  |
| C -2.170993 | 3.716273  | -1.192877 | C -2.112601 | 3.816131  | -1.274312 | C -3.726972 | 1.795135  | 0.412788  | C -3.729241 | 1.988596  | 0.411173  | C 2.094572  | 1.214407  | 3.543338  |
| C -3.055775 | 2.533316  | -1.298852 | C -3.058024 | 2.692284  | -1.459738 | C 1.843773  | 4.092195  | 0.275790  | C 1.953378  | 4.036527  | 0.214570  | C 1.941124  | 2.437604  | 2.722718  |
| C -3.272973 | 1.737487  | -0.131778 | C -3.377295 | 1.876797  | -0.320935 | C 1.242368  | 4.585270  | -0.955021 | C 1.382438  | 4.419518  | -1.040130 | C 0.628914  | 2.805664  | 2.288739  |
| C 2.503525  | 3.466264  | 0.271733  | C 2.462412  | 3.247445  | 0.396225  | C -0.196965 | 4.852542  | -0.959285 | C -0.837299 | 4.837949  | -1.074229 | C 0.696362  | -3.285181 | 2.143487  |
| C 2.033022  | 4.064707  | -0.943552 | C 2.087276  | 3.909074  | -0.819520 | C -0.928791 | 4.753874  | 0.268256  | C -0.781600 | 4.837134  | 0.149572  | C 2.000268  | -2.909395 | 2.595110  |
| C 0.636665  | 4.554489  | -0.997086 | C 0.724865  | 4.822121  | -0.922039 | C 0.932272  | 0.121471  | 0.446027  | C 2.838940  | 0.027586  | 0.585098  | C 2.170405  | -1.723471 | 3.477306  |
| C -0.182198 | 4.422113  | 0.170494  | C -0.154847 | 4.364066  | 0.201502  | C 3.202875  | 0.774802  | -0.794296 | C 3.148720  | 0.606776  | -0.682403 | C 0.941864  | -0.998162 | 3.824187  |
| C 3.270780  | -0.550600 | 0.089732  | C 3.004732  | -0.798746 | 0.121107  | C 3.122566  | 2.254253  | -0.864235 | C 3.144524  | 2.083236  | -0.823894 | C -0.014747 | -2.724993 | -1.847151 |
| C 3.692021  | 0.185102  | -1.063823 | C 3.522927  | -0.056400 | -0.987550 | C 2.778248  | 2.982946  | 0.317380  | C 2.829507  | 2.884899  | 0.317829  | C 1.280249  | -3.268245 | -1.542338 |
| C 3.714747  | 1.659838  | -0.981077 | C 3.626776  | 1.410967  | -0.856750 | C -0.501157 | -2.630177 | 0.456512  | C -0.731751 | -2.550120 | 0.693373  | C 1.532020  | -3.768135 | -0.172240 |
| C 3.326703  | 2.273614  | 0.251644  | C 3.215095  | 2.009017  | 0.375745  | C 0.320648  | -2.392670 | -0.709929 | C 0.108361  | -2.398151 | -0.476229 | C 0.463654  | -3.720001 | 0.781187  |
| C -0.243989 | -2.618162 | -0.167036 | C -0.605266 | -2.653068 | -0.362947 | C 1.667373  | -1.756309 | -0.664750 | C 1.486931  | -1.835780 | -0.443885 | C -0.234224 | 1.274115  | -2.561464 |
| C 0.543037  | -2.582740 | -1.370833 | C 0.239762  | -2.625857 | -1.529072 | C 2.190329  | -1.140214 | 0.546566  | C 0.832523  | -1.189268 | 0.739820  | C 0.913940  | 0.626548  | 3.114565  |
| C 1.957387  | -2.168424 | -1.294568 | C 1.669774  | -2.296901 | -1.375258 | C -3.578354 | 0.307615  | 0.466811  | C -3.652484 | 0.544913  | 0.534790  | C 0.930105  | -0.845649 | -3.150274 |
| C 2.422724  | -1.703578 | -0.031379 | C 2.097533  | -1.894670 | -0.077765 | C -3.407147 | -0.453875 | -0.712720 | C -3.512324 | -0.281105 | -0.613748 | C -0.203890 | -1.543942 | -2.628669 |
| C -3.260887 | 0.290157  | -0.201945 | C -3.444406 | 0.433626  | -0.445580 | C -2.463164 | -1.578363 | -0.684562 | C -2.628743 | -1.450513 | -0.514386 | C 0.385933  | 3.299483  | 0.948421  |
| C -3.050115 | -0.403864 | -1.425087 | C -3.215325 | -0.234865 | -1.679468 | C -1.781833 | -1.929725 | 0.533607  | C -1.974827 | -1.780758 | 0.720773  | C 1.452460  | 3.416532  | -0.000967 |
| C -2.184093 | -1.604428 | -1.406218 | C -2.420931 | -1.483538 | -1.659705 | C -3.771799 | 1.663529  | -2.016775 | C -3.762421 | 1.787427  | -0.211077 | C 1.211148  | 2.977622  | -1.393657 |
| C -1.599347 | -2.062953 | -0.156611 | C -1.923740 | -2.017457 | -0.400329 | C -2.313024 | 2.110963  | -3.287352 | C 3.173534  | 2.144357  | -3.297171 | C 0.072103  | 2.438771  | -1.724007 |
| C -1.372006 | 1.849394  | -2.549784 | C -3.124004 | 2.045144  | -2.734786 | C -2.476713 | 3.303858  | -3.340826 | C -2.376767 | 3.294378  | -3.400234 | C 3.022212  | 2.836386  | 1.871720  |
| C -2.456153 | 2.341173  | -3.739078 | C -2.354663 | 2.536866  | -3.874564 | C -2.285819 | 4.091730  | -2.127665 | C -2.154244 | 4.129158  | -2.224330 | C 4.292982  | 2.120531  | 1.871228  |
| C -1.616329 | 3.461526  | -3.640558 | C -1.457452 | 3.602504  | -3.701188 | C -0.946537 | 4.646192  | -2.161521 | C -0.787929 | 4.612437  | -2.272104 | C 4.442455  | 0.965112  | 2.654398  |
| C -1.434681 | 4.121782  | -2.351904 | C -1.299997 | 4.211988  | -2.384355 | C -0.306261 | 4.195114  | -3.392941 | C -0.162895 | 4.070819  | -3.474124 | C 3.325058  | 0.485355  | 3.461347  |
| C -0.048795 | 4.538429  | -2.254866 | C 0.101136  | 4.542796  | -2.210008 | C 0.056125  | 3.662351  | -3.387418 | C 1.180995  | 3.670936  | -3.440512 | C 3.340914  | -0.964594 | 3.426354  |
| C 0.625410  | 4.142401  | -3.485594 | C 0.810273  | 4.143331  | -3.419796 | C 1.822509  | 3.972314  | -2.151425 | C 1.943971  | 3.801864  | -2.204349 | C 4.468255  | -1.381597 | 2.598177  |
| C 1.949937  | 3.684303  | -3.436795 | C 2.102269  | 3.660974  | -3.324692 | C 2.753877  | 3.861569  | -2.106195 | C 2.816118  | 2.647753  | -2.096719 | C 3.443317  | -2.500757 | 1.760970  |
| C 2.642106  | 3.602764  | -2.154181 | C 2.726579  | 3.447826  | -2.014797 | C 2.567500  | 2.067055  | -3.314087 | C 2.597549  | 1.806479  | -3.266537 | C 3.089699  | -3.243769 | 1.727043  |
| C 3.475564  | 2.416383  | -2.172990 | C 3.490994  | 2.215424  | -2.033429 | C 2.628065  | 0.669170  | -3.248738 | C 2.620905  | 0.410506  | -3.133395 | C 2.857549  | -3.664847 | 0.358079  |
| C 3.300903  | 1.763714  | -3.466158 | C 3.341548  | 1.612180  | -3.353713 | C 2.930011  | 0.017140  | -1.971014 | C 2.845597  | -0.192233 | -1.823574 | C 3.967865  | -3.180824 | -0.455821 |
| C 3.282891  | 0.363304  | -3.543707 | C 3.245858  | 0.217945  | -3.476872 | C 2.168879  | -1.214108 | -1.907156 | C 2.022445  | -1.378393 | -1.706781 | C 3.728132  | -2.177849 | -1.758461 |
| C 3.442589  | -0.432183 | -2.331449 | C 3.300093  | -0.620651 | -2.284860 | C 1.434620  | -1.322596 | -3.167353 | C 1.293056  | -1.509759 | -2.968055 | C 2.368673  | -2.719146 | -2.286271 |
| C 2.580547  | -1.595149 | -2.445709 | C 2.379709  | -1.727285 | -2.476972 | C 0.139749  | -1.846874 | -3.167951 | C -0.026789 | -1.966077 | -2.957731 | C 2.193117  | -1.522324 | -3.008471 |
| C 1.881275  | -1.512752 | -3.721163 | C 1.748821  | -1.566313 | -3.780196 | C -0.430809 | -2.299662 | -1.918035 | C 0.628224  | -2.328224 | -1.692969 | C 3.450831  | -0.784409 | -3.063307 |
| C 0.539779  | -1.914085 | -3.797711 | C 0.391622  | -1.884868 | -3.930475 | C -1.837766 | -1.967659 | -1.912531 | C -2.017839 | -1.928277 | -2.717021 | C 3.435264  | -0.617038 | -3.029723 |
| C -0.140098 | -2.399494 | -2.603291 | C -0.371790 | -2.364414 | -2.784812 | C -2.138843 | -1.303269 | -3.714485 | C -2.275055 | -3.111081 | -3.011595 | C 2.161632  | 1.327057  | -3.016842 |
| C -1.502611 | -1.925100 | -2.623506 | C -1.701853 | -1.808646 | -2.853419 | C -0.303817 | -0.229109 | -3.203700 | C -3.119013 | -0.194968 | -3.100468 | C 2.311195  | 2.489033  | -2.162924 |
| C -1.676695 | -1.147819 | -3.848979 | C -1.772359 | -0.987529 | -4.061428 | C -3.651932 | 0.221152  | -1.961984 | C -3.715453 | 0.344811  | -1.887128 | C 3.670602  | 2.492254  | -1.634622 |
| C -2.482747 | -0.803616 | -3.845967 | C -2.510834 | -0.201849 | -4.057912 | C -0.808587 | 2.242076  | -0.850387 | C -0.754216 | 2.078372  | -4.841855 | C 3.908037  | -2.897095 | -3.010996 |
| C -3.142436 | 0.393135  | -5.613014 | C -3.206027 | 0.600497  | -2.844938 | C -1.580414 | 0.999699  | -4.802719 | C -1.588935 | 0.881402  | -4.742659 | C 2.780138  | -3.317069 | 0.524446  |

|             |           |           |             |           |           |             |           |           |             |           |           |             |           |            |
|-------------|-----------|-----------|-------------|-----------|-----------|-------------|-----------|-----------|-------------|-----------|-----------|-------------|-----------|------------|
| C -3.276480 | 1.713924  | -0.122021 | C -3.383250 | 1.732920  | -0.327083 | C 1.223346  | 4.512125  | -0.938849 | C 1.470848  | 4.334538  | -0.885315 | C -3.275856 | 1.684443  | -0.129708  |
| C 2.487548  | 3.486362  | 0.269998  | C 2.438757  | 3.126309  | 0.495008  | C -0.218809 | 4.847426  | -0.945384 | C 0.074014  | 4.819698  | -0.958282 | C 2.489434  | 3.548727  | 0.256625   |
| C 0.212351  | 4.074708  | -0.948273 | C 2.053547  | 3.868777  | -0.669728 | C -0.952502 | 4.739165  | 0.280338  | C -0.718215 | 4.809221  | 0.235441  | C 2.002516  | 4.109150  | -0.967473  |
| C 0.611963  | 4.554337  | -1.008372 | C 0.0683290 | 4.428836  | -0.729894 | C 2.947174  | 0.139759  | 0.452471  | C 2.660239  | -0.176447 | 0.626231  | C 0.595159  | 4.568615  | -1.026091  |
| C -0.205017 | 4.422370  | 0.164689  | C -0.193465 | 4.218554  | 0.382112  | C 3.214687  | 0.798460  | -0.785226 | C 3.047283  | 0.432847  | -0.605336 | C -0.218457 | 4.426333  | 0.144122   |
| C 3.281486  | -0.526683 | 0.109764  | C 0.304997  | -0.882232 | -0.072003 | C 3.122609  | 2.277323  | -0.850716 | C 3.115892  | 1.912154  | -0.690549 | C 3.295129  | 4.075714  | 0.145956   |
| C 3.697999  | 0.205942  | -1.047893 | C 3.541620  | -0.054460 | -1.124176 | C 2.769276  | 2.990956  | 0.332609  | C 2.791513  | 2.685477  | 0.467919  | C 3.687978  | 4.224897  | -1.022639  |
| C 3.710812  | 1.681347  | -0.973224 | C 3.626221  | 1.400932  | -0.887929 | C -0.463164 | -2.641632 | 0.453593  | C -1.023231 | -2.586025 | 0.501876  | C 3.705406  | 1.722650  | -0.965781  |
| C 3.319108  | 2.299456  | 0.256198  | C 3.208110  | 1.902958  | 0.385014  | C 0.359506  | -2.392084 | -0.712592 | C -0.131294 | -2.432933 | -0.629651 | C 3.327724  | 2.365345  | 0.257816   |
| C -0.218104 | -2.619019 | -0.135328 | C -0.551138 | -2.742177 | -0.687721 | C 1.700066  | -1.745516 | -0.666587 | C 1.268282  | -1.936565 | -0.524307 | C -0.266884 | -2.537553 | -0.130432  |
| C 0.568397  | -2.584827 | -1.339149 | C 0.291178  | -2.620270 | -1.848527 | C 2.214687  | -1.127121 | 0.546250  | C 1.793756  | -1.358347 | 0.702893  | C 0.545690  | -2.578848 | -1.304907  |
| C 1.979506  | -2.160285 | -1.264966 | C 1.717478  | -2.285221 | -1.672011 | C -3.567322 | 0.271491  | 0.460349  | C -3.793326 | 0.644883  | 0.347093  | C 1.956711  | -2.134767 | -1.213425  |
| C 2.440678  | -1.685482 | -0.003904 | C 2.142496  | -1.973862 | -0.348773 | C -3.385962 | -0.485356 | -0.729632 | C -3.644586 | -0.144852 | -0.825580 | C 2.427542  | -1.654595 | 0.061913   |
| C -3.254597 | 0.266422  | -0.184578 | C -3.432078 | 0.300909  | -0.546941 | C -2.432086 | -1.601797 | -0.693109 | C -2.818342 | -1.356364 | -0.736783 | C -3.281570 | 0.241405  | -0.191333  |
| C -0.039783 | 0.432095  | -1.404475 | C -3.195542 | -0.272732 | -1.826643 | C -1.751245 | -1.950197 | 0.525443  | C -2.230495 | -1.760860 | 0.515423  | C -3.088160 | -0.453539 | -1.426386  |
| C -2.165400 | -1.626128 | -1.379932 | C -2.384159 | -1.508188 | -1.896899 | C -3.765157 | 1.632443  | -2.019873 | C -3.744685 | 1.981896  | -2.152639 | C -2.225675 | -1.649973 | -1.425488  |
| C -1.576523 | -0.279370 | -0.128463 | C -1.877706 | -2.123170 | -0.679612 | C -2.278022 | 2.087777  | -3.287814 | C -3.089247 | 2.357290  | -3.400332 | C -1.614812 | -2.053325 | -0.181885  |
| C -3.142686 | 1.807968  | -2.540808 | C -3.131546 | 0.278858  | -2.713861 | C -2.480422 | 3.286883  | -3.336367 | C -2.237600 | 3.471516  | -3.428919 | C -3.156857 | 1.525209  | -2.556402  |
| C -2.465426 | 2.304678  | -3.732906 | C -2.373631 | 2.661948  | -3.815145 | C -2.298721 | 4.072956  | -2.120601 | C -2.025482 | 4.252614  | -2.214920 | C -2.472619 | 2.277266  | -3.747190  |
| C -1.633408 | 3.431242  | -3.640597 | C -1.490331 | 3.723853  | -3.565804 | C -0.964801 | 4.638496  | -2.149834 | C -0.637595 | 4.672648  | -2.191802 | C -1.640813 | 3.404168  | -3.656346  |
| C -1.456016 | 4.099579  | -2.355614 | C -1.339315 | 4.237840  | -2.207856 | C -0.317345 | 4.196207  | -3.381263 | C 0.010025  | 4.146310  | -3.388824 | C -1.470828 | 4.077359  | -2.372709  |
| C -0.073155 | 4.526564  | -2.261339 | C 0.057082  | 4.574292  | -2.010146 | C 1.047710  | 3.874764  | -3.373610 | C 1.131859  | 3.682611  | -3.318160 | C -0.090981 | 4.519500  | -2.281230  |
| C 0.603542  | 4.128819  | -3.490063 | C 0.778015  | 4.274850  | -3.246177 | C 1.810456  | 3.987614  | -2.135633 | C 2.040601  | 3.733464  | -2.049623 | C 0.588186  | 4.117765  | -3.510865  |
| C 1.931267  | 3.680294  | -3.439266 | C 2.069356  | 3.748748  | -3.190206 | C 2.751248  | 2.884871  | -2.091719 | C 2.863562  | 2.536835  | -1.952383 | C 1.917291  | 3.677607  | -3.453870  |
| C 2.624373  | 3.180452  | -2.156553 | C 2.698242  | 3.504381  | -1.895705 | C 2.574086  | 2.921252  | -3.302319 | C 2.654263  | 1.749084  | -3.169578 | C 2.616441  | 3.636077  | -2.171754  |
| C 3.466029  | 2.429822  | -2.169153 | C 3.478218  | 2.286272  | -2.003205 | C 2.681243  | 0.694876  | -3.240952 | C 2.609465  | 0.349969  | -3.080078 | C 3.453260  | 2.453439  | -2.169461  |
| C 3.295539  | 1.768941  | -3.458579 | C 3.334518  | 1.777561  | -3.363349 | C 2.951571  | 0.041495  | -1.964695 | C 2.754781  | -0.309809 | -1.786777 | C 2.384339  | 1.774137  | -3.452964  |
| C 3.287195  | 0.368106  | -3.528443 | C 3.257604  | 0.394786  | -3.587261 | C 2.200444  | -1.196307 | -1.906265 | C 1.874782  | -1.459940 | -1.747169 | C 3.272479  | 0.367184  | -3.498306  |
| C 3.452584  | -0.419754 | -3.211990 | C 3.324968  | -0.526992 | -2.458909 | C 1.469484  | -1.307485 | -3.167480 | C 1.912931  | -1.511614 | -3.039742 | C 3.438666  | -0.399276 | -2.786465  |
| C 2.598661  | -1.589193 | -2.419420 | C 2.418790  | -1.628789 | -2.729964 | C 0.178817  | -1.842213 | -3.170446 | C -0.147224 | -1.906333 | -3.096527 | C 2.573522  | -1.578485 | -2.367985  |
| C 1.898630  | -1.518580 | -3.695255 | C 1.783846  | -1.382149 | -4.017767 | C -0.390588 | -2.302831 | -1.922481 | C -0.814448 | -2.284689 | -1.870072 | C 1.883211  | -1.522079 | -3.649138  |
| C 0.560048  | -1.929718 | -3.769753 | C 0.438971  | -1.707300 | -4.190800 | C -1.800607 | -1.982055 | -1.920507 | C -2.182319 | -1.818936 | -1.932237 | C 0.548782  | -1.948779 | -3.746316  |
| C -0.116277 | -2.413313 | -2.726665 | C -0.324716 | -2.278735 | -3.082624 | C -2.104380 | -1.317839 | -3.181152 | C -2.359173 | -1.144014 | -3.211126 | C -0.136384 | -2.429870 | -2.554488  |
| C -1.482106 | -1.948923 | -2.595564 | C -1.662479 | -1.737873 | -3.111310 | C -3.013453 | -0.250996 | -3.209909 | C -3.147844 | 0.012491  | -3.290155 | C -1.514327 | -1.980654 | -2.614066  |
| C -1.661786 | -1.179332 | -3.825925 | C -1.745119 | -0.832273 | -4.256399 | C -3.633261 | 0.190868  | -1.968622 | C -3.767883 | 0.535334  | -2.081217 | C -1.675722 | -1.208236 | -3.843239  |
| C -2.475761 | -0.040775 | -3.827587 | C -2.498750 | 0.344164  | -4.166548 | C -0.800236 | 2.242974  | -4.844990 | C 0.615159  | 2.233779  | -4.852271 | C -2.490366 | -0.067365 | -3.844146  |
| C -3.137932 | 0.357947  | -2.596514 | C -3.197880 | 0.644701  | -2.928300 | C -1.561729 | 0.994257  | -4.802164 | C -1.506760 | 1.074210  | -4.830902 | C -3.167310 | 0.336845  | -2.616674  |
| C 0.035184  | 2.357755  | -5.141964 | C -0.190735 | 2.725401  | -5.104386 | C -2.744355 | 0.921795  | -4.037112 | C -2.721845 | 1.138319  | -4.117257 | C 0.032999  | 2.338995  | -5.152495  |
| C -0.834494 | 1.183047  | -5.239947 | C -0.731680 | 1.618583  | -5.365310 | C 0.624291  | 1.905320  | -4.834015 | C 0.764121  | 1.747347  | -4.776315 | C -0.835700 | 1.531987  | -5.245888  |
| C -2.061077 | 1.161658  | -4.546984 | C -1.989328 | 1.591591  | -4.731077 | C -1.258561 | 3.369145  | -4.130628 | C -0.980912 | 3.411796  | -4.169336 | C -2.067336 | 1.133458  | -4.558747  |
| C 1.421233  | 1.891439  | -5.091260 | C 1.547106  | 2.179289  | -5.047590 | C 0.745837  | 0.447042  | -4.780675 | C 0.726775  | 0.285206  | -4.701838 | C 1.416717  | 1.878642  | -5.096331  |
| C -0.361660 | 3.458975  | -4.357343 | C -0.186073 | 3.757767  | -4.221591 | C 1.528436  | 2.709946  | -4.112371 | C 1.716913  | 2.462142  | -4.022876 | C -0.371257 | 3.436276  | -4.373640  |
| C 1.409871  | 0.428877  | -5.161196 | C 1.464714  | 0.736117  | -5.278525 | C -0.606828 | -0.115824 | -4.767290 | C -0.676892 | -0.130549 | -4.743124 | C 1.406711  | 0.407405  | -5.145850  |
| C 2.350598  | 2.545747  | -4.256908 | C 2.468027  | 2.686742  | -4.109020 | C 1.761792  | 0.142697  | -3.998775 | C 1.640233  | -0.396858 | -3.869556 | C 2.343434  | 2.535270  | -4.260399  |
| C 0.014714  | -0.009309 | -5.248531 | C 0.054565  | 0.388580  | -5.470368 | C -0.879983 | -1.246826 | -3.976409 | C -1.101716 | -1.214694 | -3.953587 | C 0.014302  | -0.063841 | -5.246579  |
| C 2.323641  | -0.315099 | -4.398560 | C 2.311119  | -0.136061 | -4.566102 | C 0.078316  | -3.255042 | -1.740003 | C 0.564350  | -3.230731 | -1.804089 | C 3.230987  | -0.327305 | -4.363779  |
| C -0.398867 | -1.168897 | -4.560891 | C -0.449851 | -0.813531 | -4.932547 | C -0.292050 | 4.405961  | -1.537550 | C -0.150756 | 4.426308  | -1.523697 | C -0.400846 | -1.195357 | -4.555474  |
| C -0.357431 | -2.937846 | 4.400272  | C -0.797690 | -3.303908 | 1.812699  | C -0.993765 | -3.974156 | -2.571860 | C 0.597293  | -4.221618 | -1.656980 | C -0.386058 | -3.015718 | 2.476389   |
| C 0.485812  | -3.125698 | 3.719347  | C -1.827703 | -4.461407 | 1.473453  | C -0.111428 | -3.860740 | 3.980368  | C 0.613372  | -5.164556 | 0.602918  | C 0.450924  | -3.181695 | 3.754288   |
| H 1.151535  | -2.249328 | 3.800454  | H -2.346867 | -4.154479 | 0.547691  | H -0.293766 | -3.203639 | 4.479721  | H -0.168736 | -5.136823 | -0.160086 | H 1.249388  | -2.419874 | 3.795983   |
| C -0.402303 | -3.145833 | 4.982272  | H -1.122608 | -5.801678 | 1.180257  | C -1.951765 | -4.572399 | 4.747930  | C 1.629799  | -6.132693 | 0.514824  | C -0.383263 | -3.110815 | 3.054406   |
| H -1.048606 | -4.040146 | 5.005932  | H -0.613384 | -6.195976 | 2.075488  | H -1.953933 | -4.464779 | 5.836990  | H 1.624224  | -6.847908 | -0.313290 | H -1.751164 | -3.882282 | 0.503608   |
| H -1.045149 | -2.250474 | 5.048734  | H -0.376017 | -5.701067 | 0.372084  | C -2.889136 | -5.421718 | 4.118908  | C 2.649620  | -6.179516 | 1.482318  | H -0.894910 | -2.129774 | 5.097952   |
| C -1.302162 | -4.115524 | 2.192938  | C -0.028316 | -3.634630 | 3.098821  | H -3.623884 | -5.961532 | 4.714357  | H 3.443831  | -6.928701 | 1.411542  | C -1.334246 | -4.163986 | 2.214198   |
| C -2.620702 | -4.087987 | 2.748389  | C 1.163880  | -4.394179 | 3.053167  | C -2.878823 | -5.534405 | 2.716887  | C 2.641070  | -5.252671 | 2.540143  | C -2.692055 | -4.693829 | 2.592808   |
| H -2.963561 | -3.192846 | 3.274437  | H 1.584927  | -4.683094 | 2.087008  | C -3.605365 | -6.181406 | 2.216381  | H 3.428064  | -5.278501 | 3.300133  | H -3.082500 | -3.170956 | 3.029404   |
| C -3.482964 | -5.192568 | 2.618515  | C 1.824595  | -4.774727 | 4.235138  | C -1.939920 | -4.829462 | 1.950699  | C 1.624650  | -4.284166 | 2.626524  | C -3.541811 | -5.201895 | 2.409264   |
| H -4.085944 | -5.149592 | 3.051776  | C 2.748398  | -5.356800 | 4.173533  | H -1.943939 | -4.911805 | 0.860733  | H 1.638914  | -3.564604 | 3.449521  | H -4.592046 | -5.133763 | 2.705884   |
| C -0.858991 | -6.344187 | 1.930669  | C 1.303985  | -4.405108 | 5.488453  | C 1.353113  | -4.619598 | 1.552551  | C -1.746511 | -3.882900 | 2.635180  | C -3.042563 | -6.389283 | 1.843845   |
| C -3.729955 | -7.201355 | 1.823824  | H 1.819340  | -4.696480 | 4.607623  | H -2.008168 | -5.171741 | 0.970309  | H -2.546473 | -3.123247 | 2.689885  | H -3.708313 | -7.247585 | 1.695257</ |

|                                                                                                                                                                                                                                                                                                                                                                                                                                      |                                 |                                 |                                 |                                 |
|--------------------------------------------------------------------------------------------------------------------------------------------------------------------------------------------------------------------------------------------------------------------------------------------------------------------------------------------------------------------------------------------------------------------------------------|---------------------------------|---------------------------------|---------------------------------|---------------------------------|
| C 1.907995 3.674077 -3.457611                                                                                                                                                                                                                                                                                                                                                                                                        | C 1.792937 3.635402 -2.795950   | C 2.061828 3.627555 -3.431269   | C 1.744731 3.654814 -2.811813   | C 1.998091 3.581184 -3.499971   |
| C 2.608660 3.638580 -2.176054                                                                                                                                                                                                                                                                                                                                                                                                        | C 2.538024 3.537593 -1.545869   | C 2.766006 3.597277 -2.120785   | C 2.495185 3.575618 -1.563800   | C 2.673972 3.559610 -2.205057   |
| C 3.451341 2.468019 -2.172198                                                                                                                                                                                                                                                                                                                                                                                                        | C 3.387085 2.364318 -1.630934   | C 3.513438 2.377190 -2.072597   | C 3.370941 2.421881 -1.649404   | C 3.483604 2.358517 -2.151504   |
| C 2.383669 1.777418 -3.454127                                                                                                                                                                                                                                                                                                                                                                                                        | C 3.177879 1.746904 -2.936496   | C 3.376888 1.687510 -3.351756   | C 3.171807 1.797639 -2.953483   | C 3.314542 1.642144 -3.411954   |
| C 3.279837 0.370389 -3.496628                                                                                                                                                                                                                                                                                                                                                                                                        | C 3.179398 0.346147 -3.049813   | C 3.331095 0.281413 -3.382234   | C 3.205142 0.397608 -3.064694   | C 3.267991 0.236088 -3.412490   |
| C 3.451037 -0.392804 -2.755516                                                                                                                                                                                                                                                                                                                                                                                                       | C 3.401364 -0.479546 -1.873989  | C 3.429769 -0.474806 -2.147988  | C 3.448825 -0.421520 -1.887896  | C 3.396619 -0.494660 -2.165085  |
| C 2.591956 -1.576579 -2.361507                                                                                                                                                                                                                                                                                                                                                                                                       | C 2.546081 -1.656151 -1.986432  | C 2.539809 -1.631504 -2.255566  | C 2.621332 -1.617025 -1.996521  | C 2.504285 -1.652325 -2.226826  |
| C 1.900024 -1.526196 -3.642117                                                                                                                                                                                                                                                                                                                                                                                                       | C 1.802310 -1.548189 -3.233892  | C 1.900660 -1.573248 -3.564269  | C 1.871544 -1.527982 -3.242193  | C 1.833311 -1.620766 -3.520719  |
| C 0.567731 -1.959691 -3.737311                                                                                                                                                                                                                                                                                                                                                                                                       | C 0.468570 -1.984041 -3.297725  | C 0.560824 -1.965433 -3.706722  | C 0.548079 -1.994279 -3.301343  | C 0.490321 -2.014464 -3.622073  |
| C -0.113700 -2.441572 -2.543686                                                                                                                                                                                                                                                                                                                                                                                                      | C -0.165103 -2.528917 -2.105844 | C -0.181301 -2.414659 -2.536806 | C -0.069537 -2.552041 -2.106738 | C -0.223281 -2.439150 -2.425394 |
| C -1.493940 -1.999378 -2.602712                                                                                                                                                                                                                                                                                                                                                                                                      | C -1.550218 -2.086402 -2.091476 | C -1.542379 -1.926902 -2.656896 | C -1.463860 -2.139696 -2.087943 | C -1.586557 -1.953047 -2.522837 |
| C -1.660639 -1.238450 -3.833337                                                                                                                                                                                                                                                                                                                                                                                                      | C -1.767011 -1.261938 -3.274883 | C -1.638515 -1.168515 -3.901345 | C -1.703372 -1.322806 -3.272049 | C -1.712503 -1.220144 -3.779684 |
| C -2.481027 -0.094045 -3.835646                                                                                                                                                                                                                                                                                                                                                                                                      | C -2.593164 -0.130906 -3.192460 | C -2.422645 -0.006871 -3.944335 | C -2.554989 -0.210947 -3.188822 | C -2.497317 -0.059374 -3.827980 |
| C -3.158773 0.309523 -2.608336                                                                                                                                                                                                                                                                                                                                                                                                       | C -3.228184 0.210190 -1.924967  | C -3.136836 0.431622 -2.749870  | C -3.194416 0.117551 -1.920229  | C -3.182138 0.404454 -2.626011  |
| C 0.028827 2.314476 -5.151434                                                                                                                                                                                                                                                                                                                                                                                                        | C 0.0143778 2.351014 -4.482121  | C 0.208783 2.307697 -5.183756   | C 0.0167168 2.324074 -4.490139  | C 0.102930 2.226897 -5.179313   |
| C -0.834037 1.130945 -5.241541                                                                                                                                                                                                                                                                                                                                                                                                       | C -1.003720 1.168830 -4.596161  | C -0.685264 1.151070 -5.296285  | C -1.000027 1.122412 -4.599372  | C -0.793637 1.068894 -5.245935  |
| C -2.064828 1.107145 -4.553220                                                                                                                                                                                                                                                                                                                                                                                                       | C -2.208553 1.105885 -3.866552  | C 1.542073 1.173593 -4.657241   | C -2.201280 1.033079 -3.866398  | C -2.034206 1.105365 -4.576983  |
| C 1.414967 1.861247 -5.095792                                                                                                                                                                                                                                                                                                                                                                                                        | C 1.246547 1.903272 -4.499966   | C 1.977674 1.812313 -5.066697   | C 1.232997 1.908106 -4.511058   | C 1.474751 1.732989 -5.085373   |
| C -0.380213 3.419292 -4.374501                                                                                                                                                                                                                                                                                                                                                                                                       | C -0.527628 3.415402 -3.639246  | C -0.195442 3.428899 -4.343986  | C 0.572682 3.380792 -3.647861   | C -0.282747 3.367632 -4.444638  |
| C 1.412346 0.397492 -5.142331                                                                                                                                                                                                                                                                                                                                                                                                        | C 1.248719 0.443637 -4.617959   | C 1.248719 0.443637 -4.617959   | C 1.268376 0.448495 -4.627437   | C 1.427757 0.268694 -5.087504   |
| C 2.339111 2.532213 -4.262204                                                                                                                                                                                                                                                                                                                                                                                                        | C 2.197571 2.536538 -3.670289   | C 2.487944 2.464175 -4.205747   | C 2.171546 2.563867 -3.685294   | C 2.405138 2.401725 -4.259981   |
| C 0.022000 -0.053256 -5.240751                                                                                                                                                                                                                                                                                                                                                                                                       | C -0.142791 -0.009955 -4.683522 | C 0.133883 -0.059870 -5.249438  | C -0.112460 -0.036270 -4.687652 | C 0.026415 -0.141447 -5.193758  |
| C 2.331060 -0.338653 -4.359762                                                                                                                                                                                                                                                                                                                                                                                                       | C 2.200267 -0.316149 -3.908919  | C 2.396705 -0.399159 -4.275864  | C 2.239269 -0.288085 -3.920134  | C 2.311979 -0.462253 -4.268763  |
| C -0.386527 -1.212551 -4.546095                                                                                                                                                                                                                                                                                                                                                                                                      | C -0.520256 -1.202055 -4.033142 | C -0.337863 -1.193121 -4.562535 | C -0.460733 -1.236272 -4.034423 | C 0.428680 -1.266460 -4.719865  |
| C -0.356463 3.027552 2.485072                                                                                                                                                                                                                                                                                                                                                                                                        | C -0.458083 -3.335760 3.176085  | C -0.404026 -3.240076 2.429061  | C -0.390469 -3.360790 3.208618  | C -0.304837 -3.220479 2.526868  |
| C 0.487612 -3.165435 3.777590                                                                                                                                                                                                                                                                                                                                                                                                        | C 0.530338 -3.489693 4.313571   | C 0.337070 -3.234739 3.749451   | C 0.587974 -3.495629 3.694046   | C 0.502150 -3.230136 3.821685   |
| H 1.134359 -2.271930 3.843738                                                                                                                                                                                                                                                                                                                                                                                                        | H 1.384484 -2.800712 4.198193   | H 0.721232 -2.292960 3.990771   | H 1.299983 -2.651826 4.311801   | H 0.993731 -2.245362 3.922836   |
| C -0.406461 -3.185646 5.038427                                                                                                                                                                                                                                                                                                                                                                                                       | C -0.144803 -3.231540 5.695384  | C -1.380136 4.318679 2.182534   | C -0.204036 -3.336974 5.703887  | C -0.316499 -3.476241 5.108950  |
| H -1.060007 -0.474822 5.053308                                                                                                                                                                                                                                                                                                                                                                                                       | H -0.988587 -0.934758 5.824126  | C -2.360888 4.623854 3.702631   | H -0.947208 -4.145153 5.818120  | H -0.809549 -4.462633 5.095961  |
| H -1.042615 -2.284470 5.096672                                                                                                                                                                                                                                                                                                                                                                                                       | H -0.573252 -2.211609 5.695164  | H -2.422319 4.010196 4.073813   | H -0.729397 -2.367582 5.742141  | H -1.085005 -2.698405 5.253477  |
| C -1.323434 -2.145784 2.211442                                                                                                                                                                                                                                                                                                                                                                                                       | C -1.368712 -4.459149 2.884733  | C -3.273921 -5.669818 2.980439  | C -1.364784 -4.432901 2.898745  | C -1.286605 -4.301344 2.214432  |
| C -2.644635 -4.106364 2.748014                                                                                                                                                                                                                                                                                                                                                                                                       | C -2.776716 -4.282660 2.782519  | H -4.028950 -5.874973 3.744868  | C -2.752587 -4.203951 3.112908  | C -2.465433 -4.480108 2.959113  |
| H -2.982130 -3.216152 3.240849                                                                                                                                                                                                                                                                                                                                                                                                       | H -3.205564 -3.287673 2.920172  | C -3.226430 -6.451490 1.807599  | H -3.084698 -3.230536 3.482525  | H -2.720596 -3.763263 3.742476  |
| C -3.528722 -5.182233 2.507968                                                                                                                                                                                                                                                                                                                                                                                                       | C -3.624841 -5.378055 2.551331  | H -3.936871 -7.270129 1.662766  | C -3.693597 -5.221366 2.885064  | C -3.343992 -5.535909 2.664777  |
| H -4.549129 -5.124785 2.896385                                                                                                                                                                                                                                                                                                                                                                                                       | H -4.705324 -5.219466 2.489086  | C -2.256944 -6.172970 0.826211  | H -4.753858 -5.028004 3.071221  | H -4.268439 -5.643924 3.238680  |
| C -3.104480 -6.322975 1.801307                                                                                                                                                                                                                                                                                                                                                                                                       | C -3.091010 -6.671638 2.404980  | H -2.203536 -6.781109 -0.081144 | C -3.275771 -6.481033 2.614695  | C -3.045830 -6.442441 1.629080  |
| H -3.793404 -7.156537 2.637944                                                                                                                                                                                                                                                                                                                                                                                                       | H -3.752077 -7.521909 2.216923  | C -1.347582 -5.117497 1.005572  | H -4.009969 -7.269146 2.228301  | H -3.731673 -7.263672 1.402983  |
| C -1.792685 -6.380097 1.294057                                                                                                                                                                                                                                                                                                                                                                                                       | C -1.697513 -6.865268 2.503527  | H -0.586023 -4.926766 0.246903  | C -1.907632 -6.71016 1.280204   | C -1.865286 -6.278871 0.880000  |
| H -1.458918 -7.257687 0.733328                                                                                                                                                                                                                                                                                                                                                                                                       | H -1.274468 -7.866413 2.382168  | C 1.530373 -4.239654 3.737071   | H -1.577189 -7.686261 1.796804  | H -1.626613 -6.976052 0.071810  |
| C -0.908247 -5.305189 1.496405                                                                                                                                                                                                                                                                                                                                                                                                       | C -0.848270 -5.778191 2.748035  | H 1.148346 -5.253229 3.515408   | C -0.960606 -5.708784 2.422504  | C -0.990631 -5.215590 1.160670  |
| H 0.104455 -5.347294 1.086287                                                                                                                                                                                                                                                                                                                                                                                                        | H 0.232881 -5.936873 2.799883   | H 2.216221 -3.965784 2.913168   | H 0.094088 -5.892075 2.206589   | H -0.073875 -5.899653 0.577502  |
| C 0.226185 -3.212221 5.942680                                                                                                                                                                                                                                                                                                                                                                                                        | C 0.941274 -4.515788 4.309751   | C 2.291535 -4.239942 5.076500   | H 0.495663 -3.382299 6.556949   | C 1.361654 -3.449294 5.980001   |
| C 1.410623 -4.403625 3.725494                                                                                                                                                                                                                                                                                                                                                                                                        | C 0.855215 -3.381678 6.857064   | H 3.129472 -4.957587 5.052339   | C 1.415126 -4.801127 4.378073   | C 1.634988 -4.240341 3.680493   |
| H 0.825874 -5.338291 3.682327                                                                                                                                                                                                                                                                                                                                                                                                        | H 1.297910 -4.393951 6.875479   | H 7.707777 -3.241408 5.298543   | H 0.772914 -5.689564 4.499955   | H 1.209706 -5.306828 3.573733   |
| H 2.082579 -4.371347 2.849408                                                                                                                                                                                                                                                                                                                                                                                                        | H 1.680267 -2.652711 6.768452   | H 1.627255 -4.522624 5.912940   | H 2.000257 -4.911938 3.448931   | H 2.271957 -4.083100 2.804481   |
| H 2.039174 -4.437083 4.632583                                                                                                                                                                                                                                                                                                                                                                                                        | H 0.358822 -3.214677 7.828425   | H -0.352892 -3.519263 4.564502  | H 2.123112 -4.777493 5.225081   | H 2.272589 -4.277754 4.582136   |
| <div> <div> <div>IM-[a-b]-PCPr</div> <div>-3055.069917</div> <div>0</div> </div> <div> <div>IM-[c-c]-PCPr-1</div> <div>-3055.067086</div> <div>0</div> </div> <div> <div>IM-[a-b]-PCPr</div> <div>-3055.063674</div> <div>0</div> </div> <div> <div>IM-[c-c]-PCPr-1</div> <div>-3055.060607</div> <div>0</div> </div> <div> <div>TS2-[a-b]-PCPr</div> <div>-3055.054214</div> <div>1 (-374.99) (BP86/6-31G* opt)</div> </div> </div> |                                 |                                 |                                 |                                 |
| C -1.161509 0.435714 2.580274                                                                                                                                                                                                                                                                                                                                                                                                        | C -1.172325 1.322690 2.836444   | C -1.296446 0.356914 2.482666   | C -1.538679 1.405849 2.683797   | C -1.411521 -0.130893 2.284162  |
| C -0.258305 -0.689739 2.544780                                                                                                                                                                                                                                                                                                                                                                                                       | C -0.509256 0.019984 2.855013   | C -0.301831 -0.688171 2.516062  | C -0.865349 0.114606 2.819291   | C -0.326126 -1.101009 2.257746  |
| C 1.087054 -0.172649 2.639926                                                                                                                                                                                                                                                                                                                                                                                                        | C 0.946377 0.268238 2.855619    | C -0.988976 -0.058709 2.672130  | C 0.579846 0.387831 2.964644    | C 0.910554 -0.443455 2.545679   |
| C 1.024052 1.286748 2.810789                                                                                                                                                                                                                                                                                                                                                                                                         | C 1.163604 1.708921 2.844359    | C 0.794461 1.394309 2.821354    | C 0.778405 1.830909 2.925720    | C 0.604064 0.964715 2.764561    |
| C -0.377246 1.666762 2.771237                                                                                                                                                                                                                                                                                                                                                                                                        | C -0.144658 2.363387 2.709602   | C -0.630537 1.653169 2.693516   | C -0.529718 2.465254 2.753264   | C -0.835330 1.155791 2.620090   |
| C -2.318701 0.476682 2.769602                                                                                                                                                                                                                                                                                                                                                                                                        | C -2.353544 1.504770 2.088174   | C -2.405514 0.285828 1.609851   | C -2.635081 1.544016 1.800951   | C -2.467641 -0.356612 1.355523  |
| C -2.697096 1.705712 1.007320                                                                                                                                                                                                                                                                                                                                                                                                        | C -2.543063 2.718753 1.297283   | C -2.854904 1.472016 0.900313   | C -2.753983 2.728836 0.960083   | C -2.970468 0.995616 0.726813   |
| C -1.946281 2.883223 1.278702                                                                                                                                                                                                                                                                                                                                                                                                        | C -1.554955 3.713837 1.292431   | C -2.216223 2.711113 1.099565   | C -1.783990 3.738678 1.025889   | C -2.414406 2.244854 1.048325   |
| C -0.766125 2.861048 1.133249                                                                                                                                                                                                                                                                                                                                                                                                        | C -0.337358 3.539049 2.078784   | C -1.084821 2.800886 2.014037   | C -0.655701 3.610101 1.942839   | C -1.330420 2.329610 2.011543   |
| C 0.239830 3.711628 1.502799                                                                                                                                                                                                                                                                                                                                                                                                         | C 0.761711 4.096378 1.296471    | C -0.123322 3.725609 1.420028   | C 0.513093 4.160312 1.262574    | C -0.414608 3.354516 1.534103   |
| C 1.593491 3.345154 1.541579                                                                                                                                                                                                                                                                                                                                                                                                         | C 2.017494 3.469580 1.304349    | C 1.252199 3.474832 1.532925    | C 1.768038 3.553822 1.423727    | C 0.970083 3.158850 1.675524    |
| C 1.997193 1.221178 2.212295                                                                                                                                                                                                                                                                                                                                                                                                         | C 2.227801 2.263479 2.094368    | C 1.722956 2.290244 2.245482    | C 1.908896 2.378508 2.272694    | C 1.484933 3.195828 2.305119    |
| C 3.070140 1.523222 1.422052                                                                                                                                                                                                                                                                                                                                                                                                         | C 3.099347 1.390932 1.314320    | C 2.808912 1.783660 1.519656    | C 2.869363 1.496333 1.618643    | C 2.697883 1.581456 1.585036    |
| C 3.133412 0.124395 1.261743                                                                                                                                                                                                                                                                                                                                                                                                         | C 2.883830 0.006679 1.313326    | C 3.069647 0.393826 1.388468    | C 2.670720 0.110116 1.640075    | C 2.994283 2.026852 1.362699    |
| C 2.147188 -0.736496 1.891450                                                                                                                                                                                                                                                                                                                                                                                                        | C 1.782586 -0.571760 2.087658   | C 2.128225 -0.538817 1.983877   | C 1.501704 -0.459817 1.321579   | C 2.106810 -0.808072 1.846889   |
| C 1.865396 -1.832429 0.954143                                                                                                                                                                                                                                                                                                                                                                                                        | C 1.248547 -1.675792 1.328743   | C 1.981409 -1.661183 1.046602   | C 1.063484 -1.594527 1.538352   | C 2.070642 -1.841754 0.834394   |
| C 0.575332 -2.343383 0.820510                                                                                                                                                                                                                                                                                                                                                                                                        | C -0.179939 -2.193879 1.504148  | C 0.748767 -2.281979 0.860514   | C -0.363515 -2.134924 1.582311  | C 0.881446 -2.533014 0.540525   |
| C -0.588275 -1.997703 1.805206                                                                                                                                                                                                                                                                                                                                                                                                       | C -1.046614 -1.054467 2.134739  | C -0.485607 -2.029176 1.783858  | C -1.307660 -0.991032 2.081832  | C -0.393713 -2.345327 1.379629  |
| C -2.560713 -0.623964 0.824519                                                                                                                                                                                                                                                                                                                                                                                                       | C -2.884341 0.399380 1.311460   | C -2.507483 -0.842127 0.672158  | C 3.064296 0.406451 1.016075    | C -2.676892 -1.257665 0.339902  |
| C -1.709752 -1.726528 0.762607                                                                                                                                                                                                                                                                                                                                                                                                       | C -2.216311 -0.840484 1.321063  | C -1.572426 -1.873745 0.677977  | C -2.383075 -0.819711 1.137463  | C -1.459134 -2.213453 0.284453  |
| C -1.675103 3.748540 1.138585                                                                                                                                                                                                                                                                                                                                                                                                        | C -1.208623 4.385414 0.044393   | C -1.961478 3.582506 -0.039667  | C -1.316156 4.375222 -0.200491  | C -2.181549 3.217478 -0.004045  |
| C -2.243080 3.495195 -1.152485                                                                                                                                                                                                                                                                                                                                                                                                       | C -1.915419 4.117649 -1.172024  | C -2.437978 3.263980 -1.353170  | C -1.886374 4.057860 -1.475292  | C -2.586340 2.975529 -1.353498  |
| C -3.041429 2.263143 -1.343332                                                                                                                                                                                                                                                                                                                                                                                                       | C -2.955948 3.065558 -1.169032  | C -3.118961 1.966257 -1.562888  | C -2.908127 2.989613 -1.546986  | C -3.177493 1.667006 -1.690634  |
| C -3.204621 1.377255 -0.229867                                                                                                                                                                                                                                                                                                                                                                                                       | C -3.212442 2.360383 0.052013   | C -3.263519 1.084218 -0.444505  | C -3.282591 2.319910 -0.363606  | C -3.216232 0.695626 -0.651650  |
| C 2.425876 3.520908 0.356962                                                                                                                                                                                                                                                                                                                                                                                                         | C 2.776641 3.352377 0.060592    | C 2.126115 3.704075 0.388508    | C 2.657101 3.410100 0.272174    | C 1.863807 3.526335 0.592975    |
| C 1.918602 4.143702 -0.827813                                                                                                                                                                                                                                                                                                                                                                                                        | C 2.308032 3.935418 -1.160142   | C 1.630913 2.647478 -0.830627   | C 2.313283 3.946184 -0.102091   | C 1.379970 4.157130 -0.592511   |
| C 0.489400 4.530762 -0.869301                                                                                                                                                                                                                                                                                                                                                                                                        | C 0.982819 4.595961 -1.167014   | C 0.178790 4.532323 -0.950396</ |                                 |                                 |



| [a-b]-PCIPr<br>-3055.08387<br>0 |                                 | [c-c]-PCIPr-1<br>-3055.081568<br>0 |                                 | [a-b]-PCPr<br>-3055.13067<br>0  |  | [c-c]-PCPr-1<br>-3055.126719<br>0 |  | [a-b]-PCIPr<br>-3055.129422<br>0 |  |
|---------------------------------|---------------------------------|------------------------------------|---------------------------------|---------------------------------|--|-----------------------------------|--|----------------------------------|--|
| C -1.335896 -0.355038 -2.296623 | C -1.362486 1.636700 2.837746   | C 0.463391 2.020696 -2.260191      | C -2.546382 0.831548 -2.273676  | C 0.448014 2.005936 -2.285000   |  |                                   |  |                                  |  |
| C -0.254422 -1.394548 2.376412  | C -0.895993 0.244916 2.936702   | C -0.165838 0.814407 -2.889759     | C -2.301607 -0.364605 -3.077166 | C -0.188394 0.799417 -2.907460  |  |                                   |  |                                  |  |
| C 1.027048 -0.619518 2.504319   | C 0.568077 0.262602 2.984160    | C -1.572871 0.800853 -2.368852     | C -2.483772 -1.532498 -2.218238 | C -1.592967 0.794233 -2.381042  |  |                                   |  |                                  |  |
| C 0.692452 0.769953 2.573767    | C 0.988517 1.669216 2.895369    | C -1.834717 2.077126 -1.720054     | C -2.848030 -1.069053 -0.879636 | C -1.847332 2.073942 -1.736130  |  |                                   |  |                                  |  |
| C -0.755246 0.931175 2.631706   | C -0.204617 2.513104 2.832003   | C -0.586050 2.825528 -1.655690     | C -2.888298 0.413663 -0.913981  | C -0.595381 2.817442 -1.679089  |  |                                   |  |                                  |  |
| C -2.390857 -0.417230 1.372684  | C -2.485061 1.953319 2.038248   | C 1.734723 2.005117 -1.670590      | C -1.760896 1.984131 -2.491234  | C 1.721508 1.987354 -1.708302   |  |                                   |  |                                  |  |
| C -2.925448 0.814854 0.793484   | C -2.474686 3.142673 1.192340   | C 2.005820 2.836411 -0.501590      | C -1.261881 2.735865 -1.355963  | C 2.000623 2.828060 -0.534692   |  |                                   |  |                                  |  |
| C -2.392377 2.063177 1.151447   | C -1.355828 3.983330 1.180479   | C 1.004392 3.656023 0.044299       | C -1.572407 2.308047 -0.056541  | C 1.004755 3.646222 0.012603    |  |                                   |  |                                  |  |
| C -1.283025 2.125498 2.091889   | C -0.199910 3.676170 2.017542   | C -0.319849 3.655109 -0.545245     | C -2.436403 1.166513 0.178044   | C -0.321628 3.649336 0.572501   |  |                                   |  |                                  |  |
| C -0.391601 3.184646 1.643579   | C 0.981003 4.029815 1.251334    | C -1.282591 3.748874 0.548498      | C -2.035897 0.566743 1.491402   | C -1.279893 3.750073 0.525141   |  |                                   |  |                                  |  |
| C 0.998786 3.030197 1.762491    | C 2.134237 3.220585 1.320077    | C -2.482044 3.027084 0.448799      | C -1.991260 -1.062521 1.527234  | C -2.483529 3.033191 0.471296   |  |                                   |  |                                  |  |
| C 1.550247 1.810853 2.335277    | C 2.133676 2.025508 2.162077    | C -2.770373 2.183613 -0.668546     | C -2.356363 -1.743611 0.246098  | C -2.778825 2.187508 -0.681639  |  |                                   |  |                                  |  |
| C 2.760600 1.491713 1.952533    | C 2.884621 0.996436 1.453854    | C -3.434030 0.991751 -0.178616     | C -1.436106 -2.849404 0.065107  | C -3.445732 0.999300 -0.185681  |  |                                   |  |                                  |  |
| C 3.062145 0.151300 1.305641    | C 2.452980 -0.357387 1.527592   | C -2.145480 -0.352628 -1.868248    | C -1.102677 -3.321296 -1.213006 | C -3.161383 -0.247512 -0.764776 |  |                                   |  |                                  |  |
| C 2.183024 -0.923648 1.764572   | C 1.322527 -0.736077 2.325475   | C -1.496671 -0.169652 -1.737970    | C -1.639657 -2.652151 -2.382328 | C -2.192882 -0.354652 -1.875407 |  |                                   |  |                                  |  |
| C 2.166877 -1.940027 0.704908   | C 0.703573 -1.941371 1.680727   | C -0.086411 -1.692185 -1.981647    | C 0.580838 -2.640294 -3.390213  | C -1.474397 -1.614057 -1.681683 |  |                                   |  |                                  |  |
| C 0.976152 -2.643896 0.396375   | C -0.894784 -1.958901 1.632136  | C 0.669371 -0.598970 -2.660939     | C -0.409052 -1.515939 -4.209091 | C -1.518831 -1.704133 -1.997370 |  |                                   |  |                                  |  |
| C -0.277842 -2.513353 1.206957  | C 1.580320 -0.771772 2.238572   | C 2.477655 0.745318 -1.478623      | C -1.289325 -0.361366 -4.058007 | C 0.643727 -0.614609 -2.682357  |  |                                   |  |                                  |  |
| C 0.976152 -2.643896 0.396375   | C -0.894784 -1.958901 1.632136  | C 0.669371 -0.598970 -2.660939     | C -0.409052 -1.515939 -4.209091 | C -1.518831 -1.704133 -1.997370 |  |                                   |  |                                  |  |
| C -2.418214 -1.430197 1.313004  | C -3.147761 0.907202 1.288003   | C 1.936449 -0.477471 -1.880141     | C -0.701630 1.979919 -3.498627  | C 2.459565 0.724496 -1.056592   |  |                                   |  |                                  |  |
| C -1.371029 -2.377997 0.191976  | C -2.677279 -0.421219 1.375049  | C 0.866820 3.770220 1.493638       | C -0.470560 0.829559 -4.264843  | C 1.911954 -0.496600 -1.902657  |  |                                   |  |                                  |  |
| C -2.193643 3.089236 1.134575   | C -0.886010 0.546428 -0.086769  | C 1.797104 1.046441 2.383093       | C -0.552785 2.351853 0.981752   | C 0.873136 3.764929 1.462090    |  |                                   |  |                                  |  |
| C -2.621507 2.892133 -1.216978  | C -1.585709 4.319944 -1.315216  | C 2.863027 2.293888 1.808374       | C 0.744331 2.909582 0.730161    | C 1.804105 3.139872 2.349966    |  |                                   |  |                                  |  |
| C -3.197437 1.580038 -1.592562  | C -2.766536 3.427201 -1.303487  | C 2.912045 2.122493 0.385822       | C 1.074774 3.354241 -0.604163   | C 2.864248 2.281191 1.773780    |  |                                   |  |                                  |  |
| C -3.298837 0.562472 -0.588969  | C -3.154531 2.827695 -0.063749  | C -2.991396 2.363260 1.682363      | C 0.082837 3.212499 -1.661714   | C 2.907109 2.105726 0.351604    |  |                                   |  |                                  |  |
| C 1.873701 3.470092 0.680420    | C 2.888437 2.932658 0.119238    | C -2.336599 2.499523 2.950076      | C -0.681147 -1.650150 1.938303  | C 2.90228 2.374949 1.669500     |  |                                   |  |                                  |  |
| C 1.351413 4.133343 -0.475887   | C 2.550305 3.510371 -1.142076   | C -1.067722 3.261771 3.013701      | C 0.394872 -0.908413 2.515466   | C -2.330065 2.512045 2.934331   |  |                                   |  |                                  |  |
| C -0.116031 4.296604 -0.601417  | C 1.342909 4.362146 -1.226113   | C -0.548213 3.830503 1.805139      | C 0.356483 0.582031 2.477995    | C -1.057745 3.269079 2.909056   |  |                                   |  |                                  |  |
| C -0.956339 3.784795 0.438696   | C 0.561645 4.562899 -0.042573   | C -3.001947 -1.426603 0.088625     | C -0.755843 1.239174 1.868047   | C -0.540443 3.832099 1.778761   |  |                                   |  |                                  |  |
| C 3.597718 -0.202505 0.000972   | C 2.496741 -1.180452 0.328144   | C -3.234919 -1.365731 1.502148     | C 0.265249 -3.740938 -1.497141  | C -3.022534 -1.419526 0.087676  |  |                                   |  |                                  |  |
| C 3.890554 0.793843 -0.986943   | C 3.054738 -0.688695 -0.898498  | C -3.528616 -0.050408 2.115761     | C 1.261618 3.781139 -0.470845   | C -3.250126 -1.353588 1.500833  |  |                                   |  |                                  |  |
| C 3.558527 2.206127 -0.688480   | C 3.495231 0.718441 -0.962376   | C -3.577635 1.102486 1.270335      | C 0.906656 -3.291058 0.877890   | C -3.536000 -0.835245 2.111784  |  |                                   |  |                                  |  |
| C 2.963128 2.516841 0.575535    | C 3.357321 1.532650 0.211407    | C 0.803947 -2.363945 -1.055002     | C -0.418296 -2.791544 1.104702  | C -3.583414 1.115503 1.263347   |  |                                   |  |                                  |  |
| C 0.621001 -0.827354 -0.968474  | C -1.492435 -2.118988 0.968474  | C 0.324669 -3.102428 0.074592      | C 0.935712 -1.039175 1.541559   | C 0.774578 -2.376117 -1.069966  |  |                                   |  |                                  |  |
| C 1.490650 -2.505698 -2.055464  | C -0.758663 -2.497302 -0.900729 | C -1.115351 -3.049353 0.378335     | C 2.100084 -1.742543 4.065531   | C 0.296564 -3.109050 0.064114   |  |                                   |  |                                  |  |
| C 2.753138 -1.805585 -1.742031  | C 0.729798 -2.481554 -0.857180  | C -1.955105 -2.257461 -0.469321    | C 1.920544 -2.927763 3.197073   | C -1.141907 -0.649363 0.373558  |  |                                   |  |                                  |  |
| C 3.027937 -1.491223 -0.371000  | C 1.384805 -2.090492 0.356473   | C 3.196494 0.833790 -0.211424      | C 0.588490 -3.322851 -2.844742  | C -1.981125 -2.256180 -0.473109 |  |                                   |  |                                  |  |
| C -2.967623 -0.827354 -0.883246 | C -3.567516 1.437440 0.000218   | C 3.440014 -0.316501 0.606597      | C 0.429256 2.748681 -2.988414   | C 3.183533 0.831990 -0.242736   |  |                                   |  |                                  |  |
| C -2.541008 -1.219125 -2.194694 | C -3.611612 0.617493 -1.173555  | C 2.350509 -1.595886 0.000731      | C 1.780688 2.407444 -3.323128   | C 3.425493 -0.335077 0.577369   |  |                                   |  |                                  |  |
| C -1.431568 -2.181613 -2.306726 | C -3.128508 -0.774763 1.083774  | C 0.843480 -1.619140 -0.992760     | C 2.023263 1.193625 -4.135041   | C 2.813482 -1.612918 0.177328   |  |                                   |  |                                  |  |
| C -0.845339 -2.680648 -1.094550 | C -2.627134 -1.248833 0.174100  | C 3.374374 1.213565 2.595536       | C 0.897827 0.409874 4.549191    | C 2.017251 -1.636199 -1.013188  |  |                                   |  |                                  |  |
| C -3.052314 1.130552 -2.943610  | C -3.078838 2.685852 -2.490594  | C 9.242151 0.987737 3.964689       | C 2.438961 3.292204 -1.067474   | C 3.373991 1.200858 2.562671    |  |                                   |  |                                  |  |
| C -2.412788 1.958417 -3.956428  | C -2.320999 2.858535 -3.728487  | C 1.908826 1.788627 4.505498       | C 3.502482 2.893741 -0.152309   | C 2.918003 0.980415 3.933470    |  |                                   |  |                                  |  |
| C -1.864323 2.200900 0.326043   | C -1.201581 3.698815 -3.740212  | C 1.311759 2.865777 3.969591       | C 3.184783 2.480936 1.149756    | C 1.928807 1.787501 4.475803    |  |                                   |  |                                  |  |
| C -1.928650 3.649278 -2.216061  | C 0.808187 4.405842 -2.513611   | C -0.102980 2.902777 4.008301      | C 1.790598 2.451349 1.580381    | C 1.322488 2.845789 3.666476    |  |                                   |  |                                  |  |
| C -0.691288 4.344259 -1.931969  | C 0.634945 4.421208 -2.469283   | C -3.818161 1.874868 5.007908      | C 1.603037 1.289613 2.429952    | C -0.090797 2.908817 3.982999   |  |                                   |  |                                  |  |
| C 0.141436 4.322836 -3.109973   | C 1.133210 3.742285 -3.668199   | C -1.582831 1.153942 4.947634      | C 2.886007 0.604473 2.527299    | C -0.370261 1.884858 4.986512   |  |                                   |  |                                  |  |
| C 1.530794 4.169315 -2.991084   | C 2.280608 2.932265 -3.576830   | C -2.544855 1.436701 3.895625      | C 2.922651 -0.795094 2.560940   | C -1.574442 1.168852 4.932766   |  |                                   |  |                                  |  |
| C 2.134504 4.029641 -1.670241   | C 2.964414 2.786622 -2.310375   | C -3.135599 0.177600 3.473438      | C 1.677457 -1.550912 2.498919   | C -2.539228 1.452698 3.873614   |  |                                   |  |                                  |  |
| C 3.224340 3.076997 -1.775535   | C 3.441096 1.392486 -2.218234   | C -2.540617 0.882150 4.281468      | C 1.926627 -2.739338 1.704223   | C -3.134869 0.194954 4.672500   |  |                                   |  |                                  |  |
| C 3.297177 2.628008 -1.160433   | C 3.043441 1.010368 3.425275    | C -2.705453 -2.130217 3.703516     | C 3.321125 -2.716309 1.273323   | C -2.543133 -0.865028 4.276204  |  |                                   |  |                                  |  |
| C 3.615398 1.290710 -3.441845   | C 2.630103 -0.644476 -3.372301  | C -2.579902 -2.360349 2.296424     | C 3.661355 -3.173044 -0.008552  | C -2.280795 -2.115943 3.700693  |  |                                   |  |                                  |  |
| C 3.880156 3.061895 -2.531176   | C 2.597643 -1.325542 -2.089191  | C -5.131143 -3.192488 1.740781     | C 2.621024 -3.668146 -0.902487  | C -2.963799 -2.384754 2.295386  |  |                                   |  |                                  |  |
| C 3.310134 0.928962 -2.727194   | C 1.437598 -2.207214 -2.067159  | C -0.571774 3.477604 2.801776      | C 2.947406 -3.245759 -2.251209  | C -1.553285 -3.186869 1.738065  |  |                                   |  |                                  |  |
| C 2.714277 -0.795270 -0.041343  | C 0.753459 -2.043314 -3.348895  | C 0.799545 -3.533600 2.508639      | C 4.190440 -2.484391 -2.190922  | C -0.951166 -3.472923 2.796211  |  |                                   |  |                                  |  |
| C 1.505477 -1.473716 -4.331339  | C -0.644344 -2.060768 -3.391792 | C 1.253530 3.301110 1.144217       | C 4.363012 -1.363581 3.017027   | C 0.778722 -3.535565 2.497892   |  |                                   |  |                                  |  |
| C 0.886682 -2.298740 -3.327784  | C -1.400460 -2.235484 -2.150271 | C 2.496513 -2.554567 1.206686      | C 3.294673 -0.963589 -3.926078  | C 1.228496 -3.380567 1.311053   |  |                                   |  |                                  |  |
| C -0.587516 -2.136108 -3.454569 | C -2.580420 -1.394451 -2.243102 | C 2.812459 -2.324765 2.609924      | C 3.256687 0.486328 -3.960228   | C 2.474836 -2.567323 1.187102   |  |                                   |  |                                  |  |
| C -0.834875 -1.215426 -4.531763 | C -2.551172 -0.708896 -3.530037 | C 3.382770 -1.103661 3.000732      | C 4.301342 0.984243 -3.927375   | C 2.797040 -2.334975 2.588484   |  |                                   |  |                                  |  |
| C -1.898929 -0.284469 -4.435242 | C -3.004808 0.621165 -3.619815  | C 3.658889 -0.077426 2.001476      | C 4.069566 2.132198 -2.300422   | C 3.374077 -1.115330 2.973754   |  |                                   |  |                                  |  |
| C -2.720788 -0.261318 -4.242742 | C -3.490400 1.298681 -2.425886  | C 0.868446 -0.886267 5.582731      | C 2.788481 2.823601 -2.394989   | C 3.650860 0.093036 1.970655    |  |                                   |  |                                  |  |
| C 0.105342 2.783081 -5.063784   | C 0.041933 2.069899 -5.158567   | C 1.928015 -1.035215 5.017361      | C 4.863303 0.652570 1.015250    | C 0.873453 -0.192312 5.562572   |  |                                   |  |                                  |  |
| C -0.465573 1.489514 -5.432934  | C -1.118336 1.192965 -5.137286  | C 2.937564 -0.449313 4.227581      | C 5.195473 1.082120 -0.344157   | C 1.927342 -1.035009 4.995579   |  |                                   |  |                                  |  |
| C -1.705166 1.086662 -4.892822  | C -2.283717 1.583410 -4.438728  | C -0.384318 -1.909497 5.20351      | C 4.527330 2.184800 -0.913758   | C 2.936401 -0.455623 4.200395   |  |                                   |  |                                  |  |
| C 1.558173 2.621458 -4.939356   | C 1.236220 1.225740 -5.052849   | C 0.865384 1.189498 5.331847       | C 4.900868 -0.810496 1.049359   | C -0.382719 -0.939233 5.050698  |  |                                   |  |                                  |  |
| C -0.584571 3.622747 -4.166020  | C -0.000001 3.308814 -4.467905  | C -0.100990 -2.253275 4.915        |                                 |                                 |  |                                   |  |                                  |  |
